# Supplementary material
Source: PubMed Central journal article supplement (PMC6448773)

# Cluster 1 – Resting

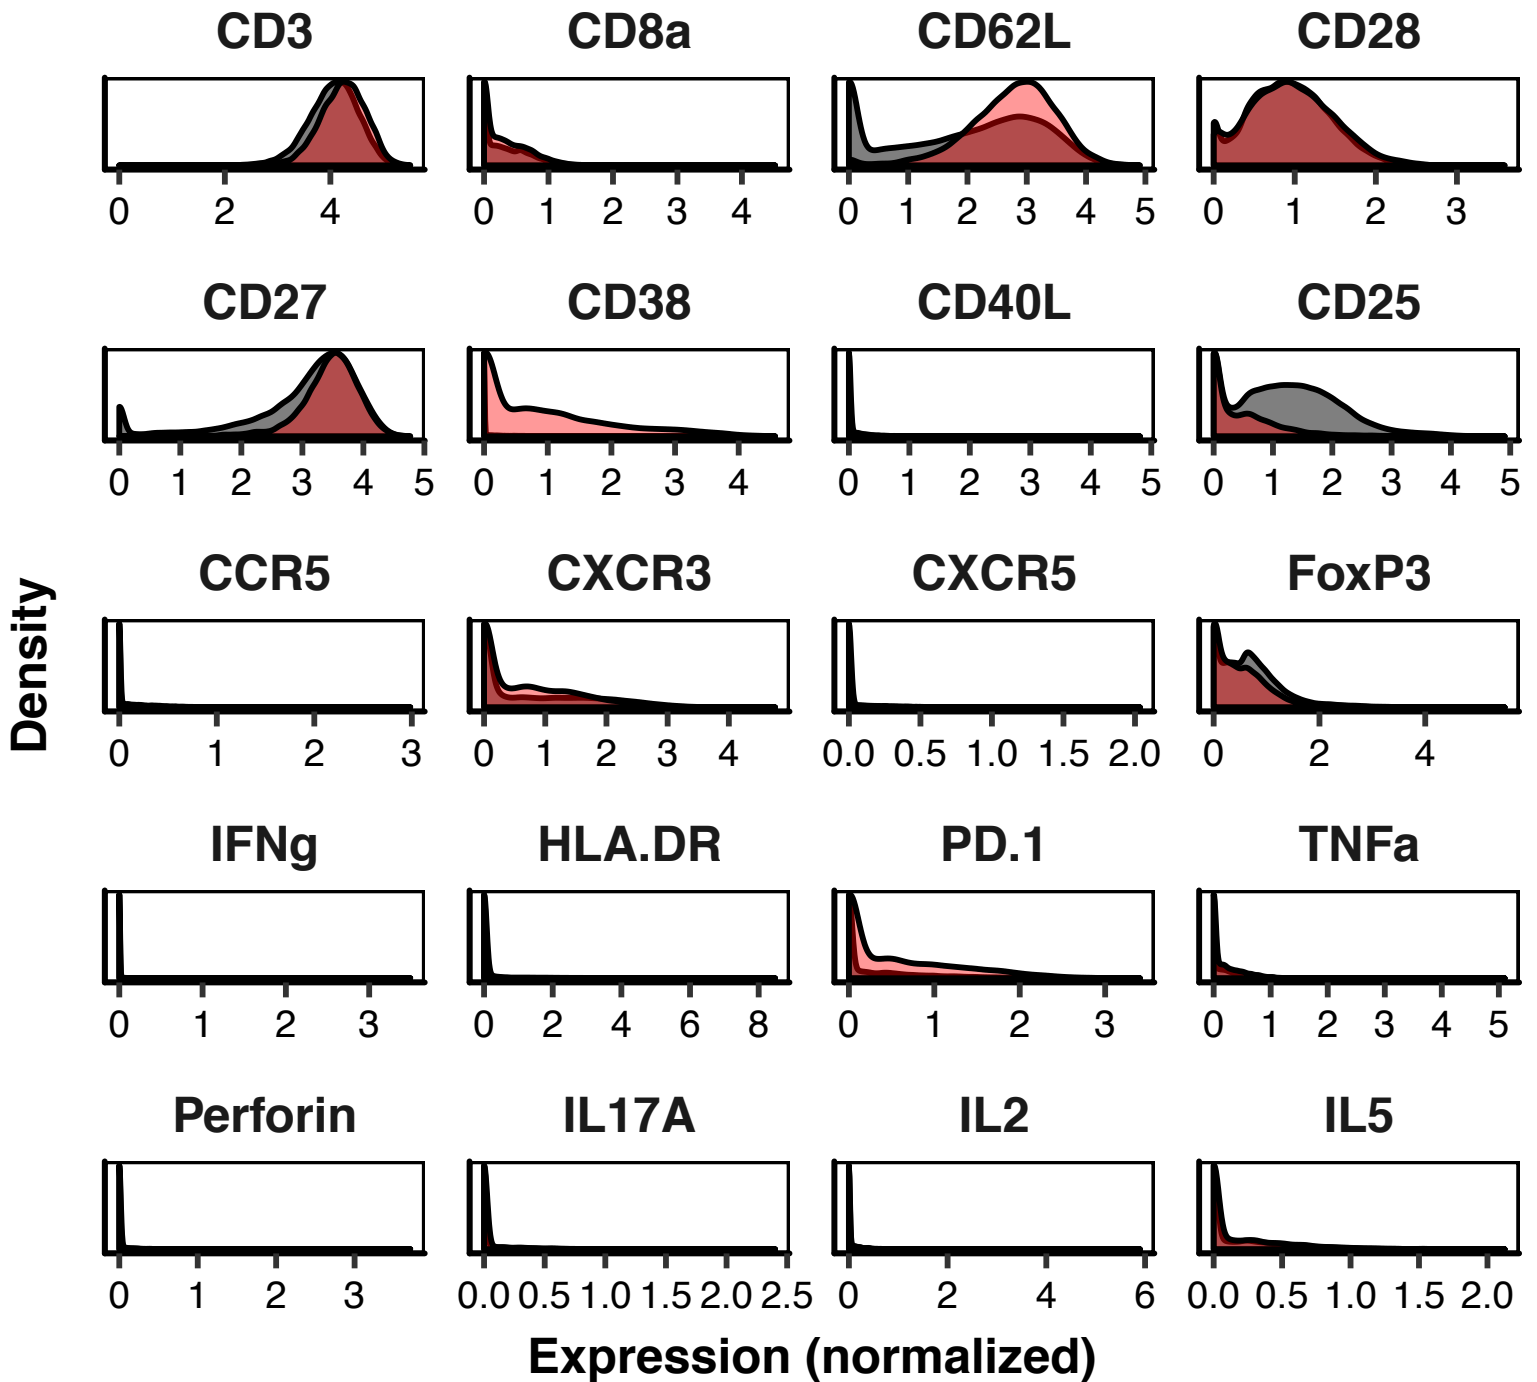

# Cluster 2 – Resting

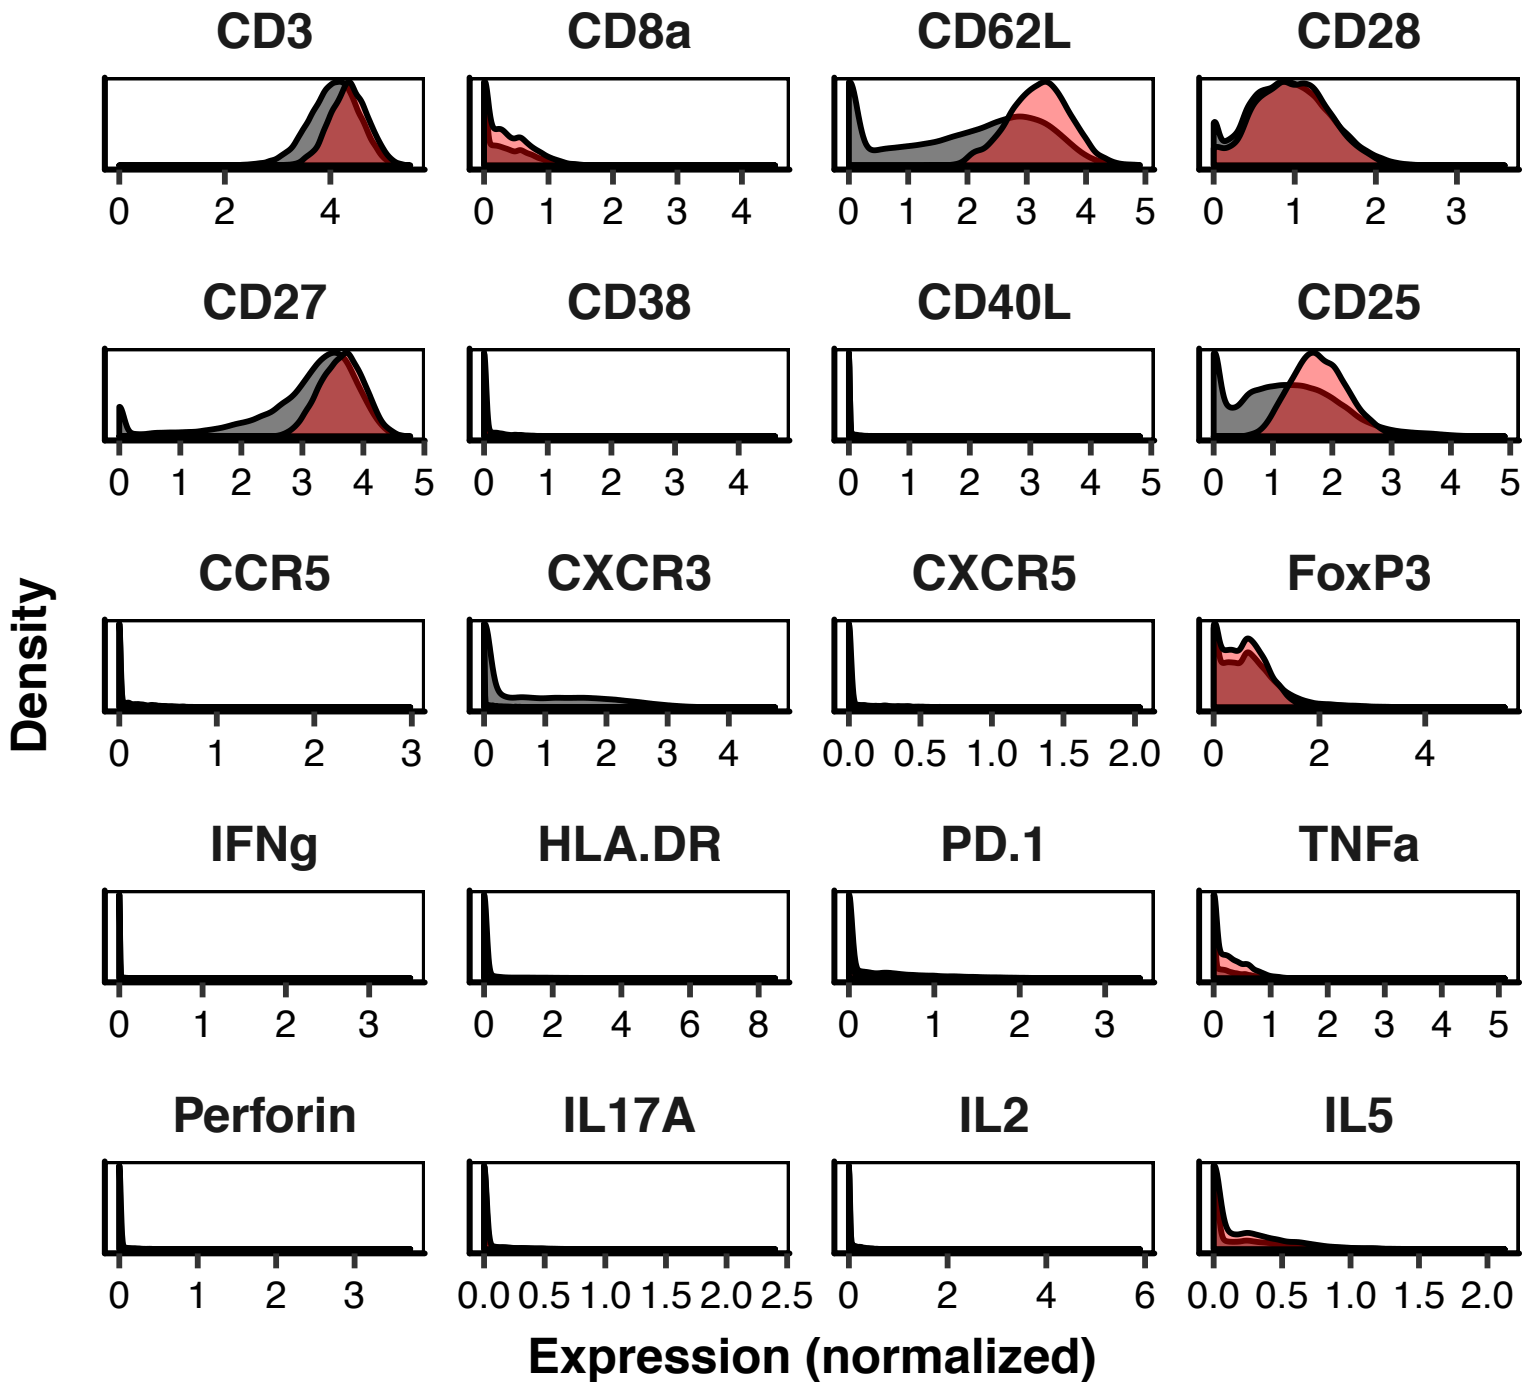

# Cluster 3 – Resting

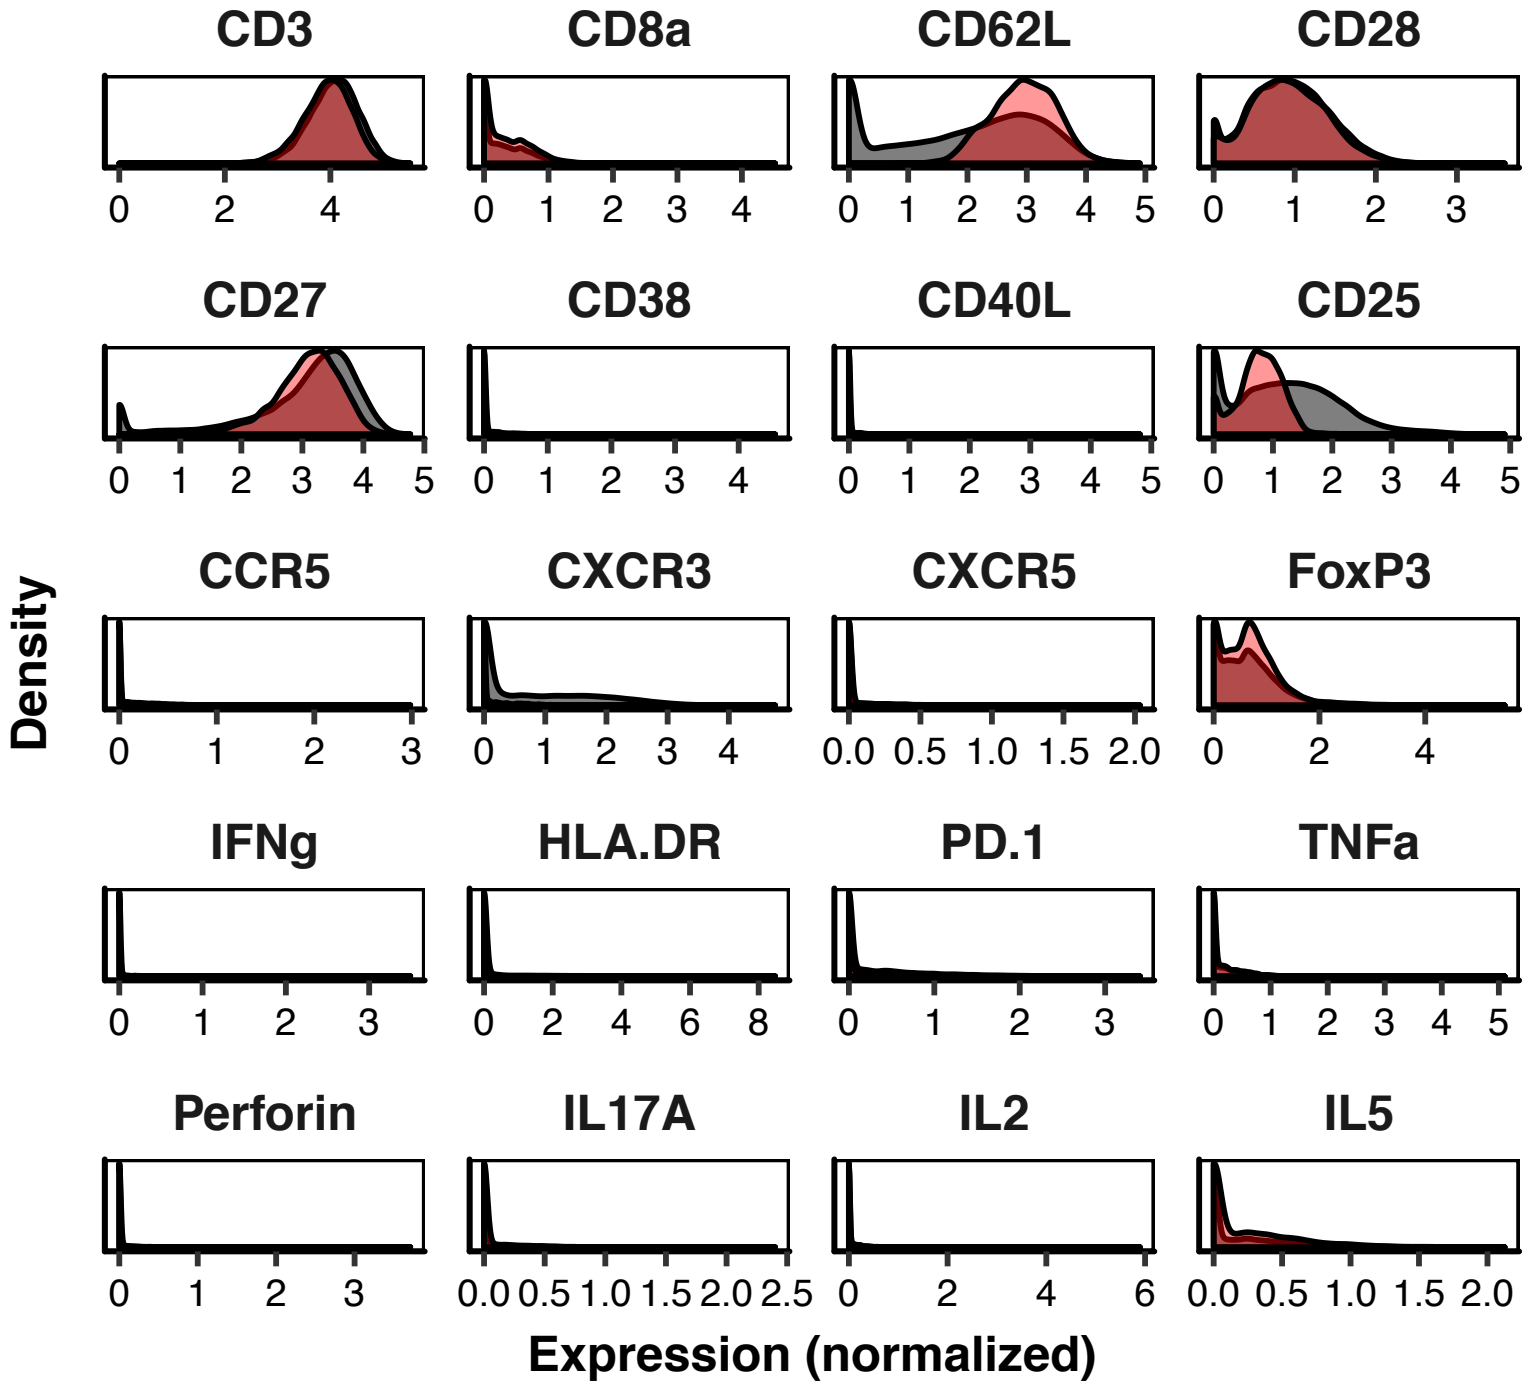

# Cluster 4 – Resting

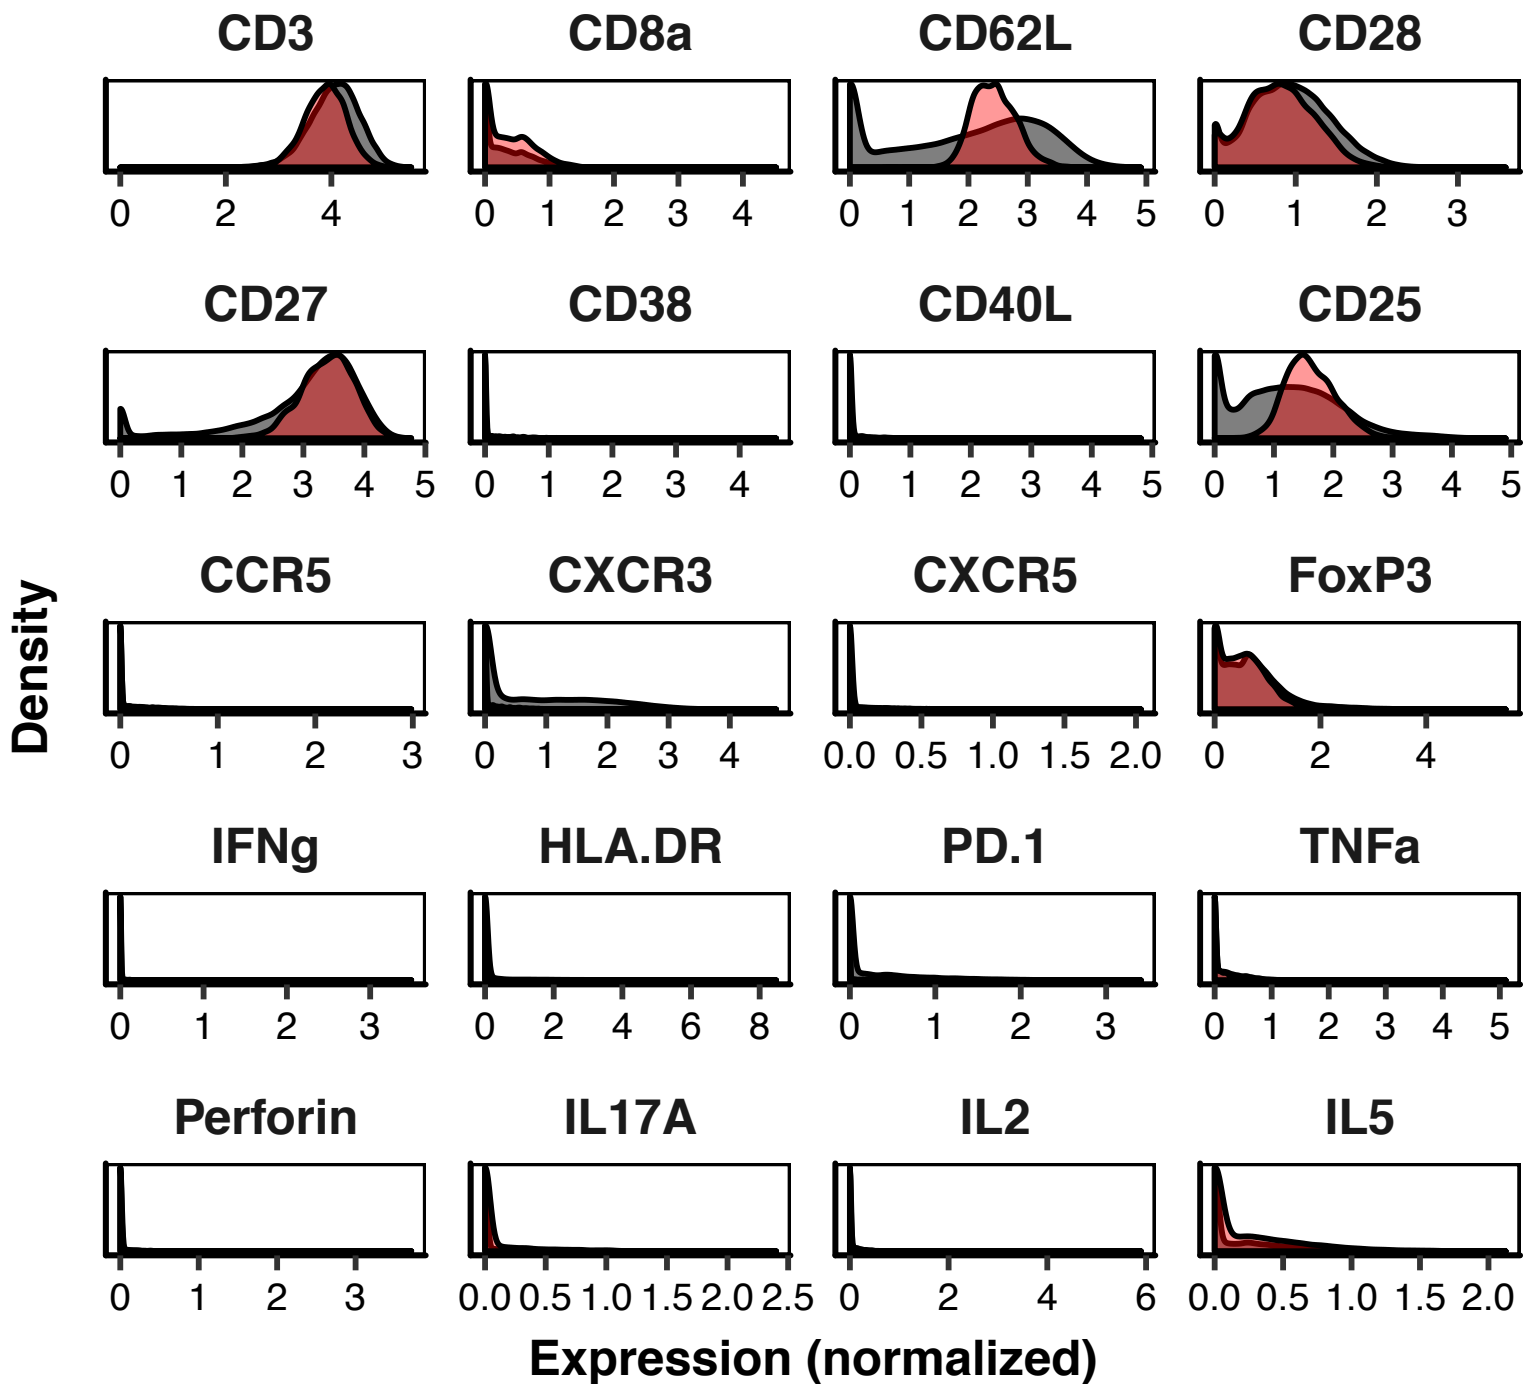

# Cluster 5 – Resting

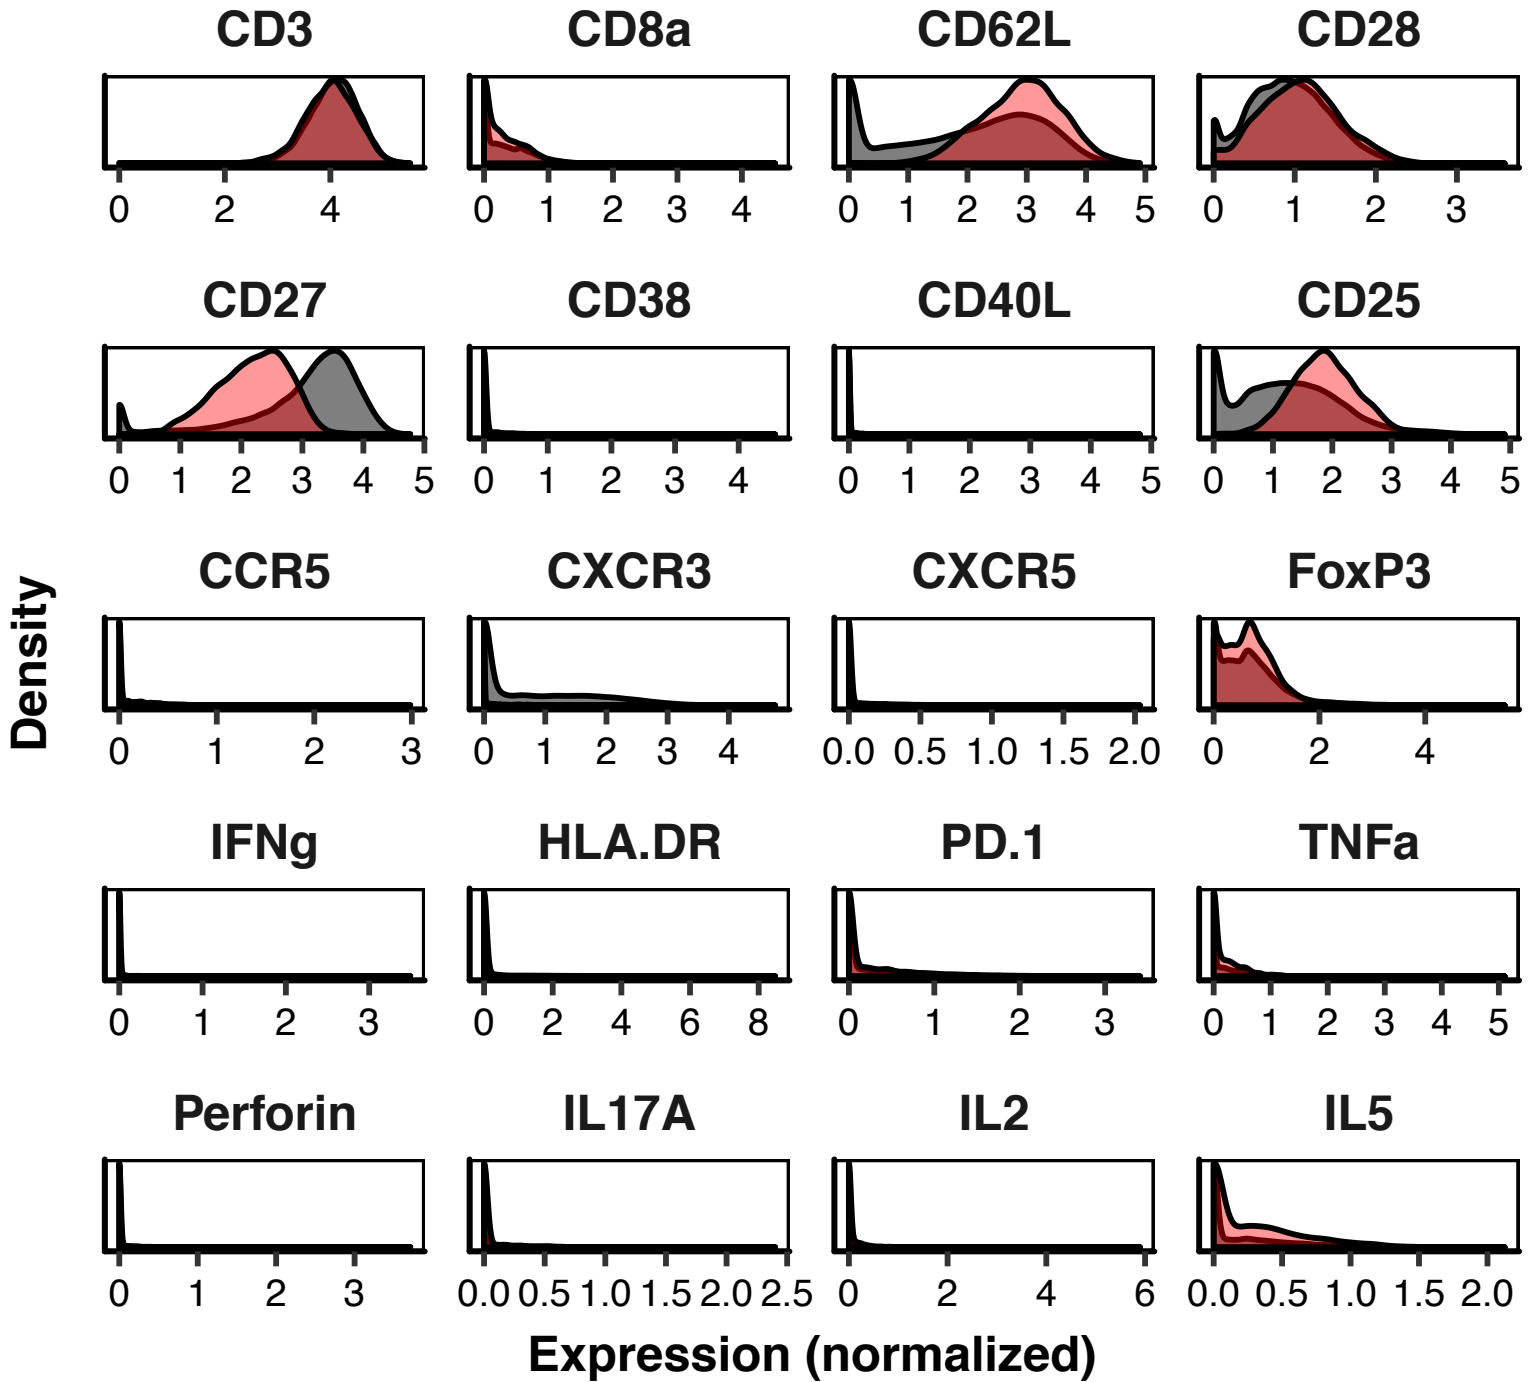

# Cluster 6 – Resting

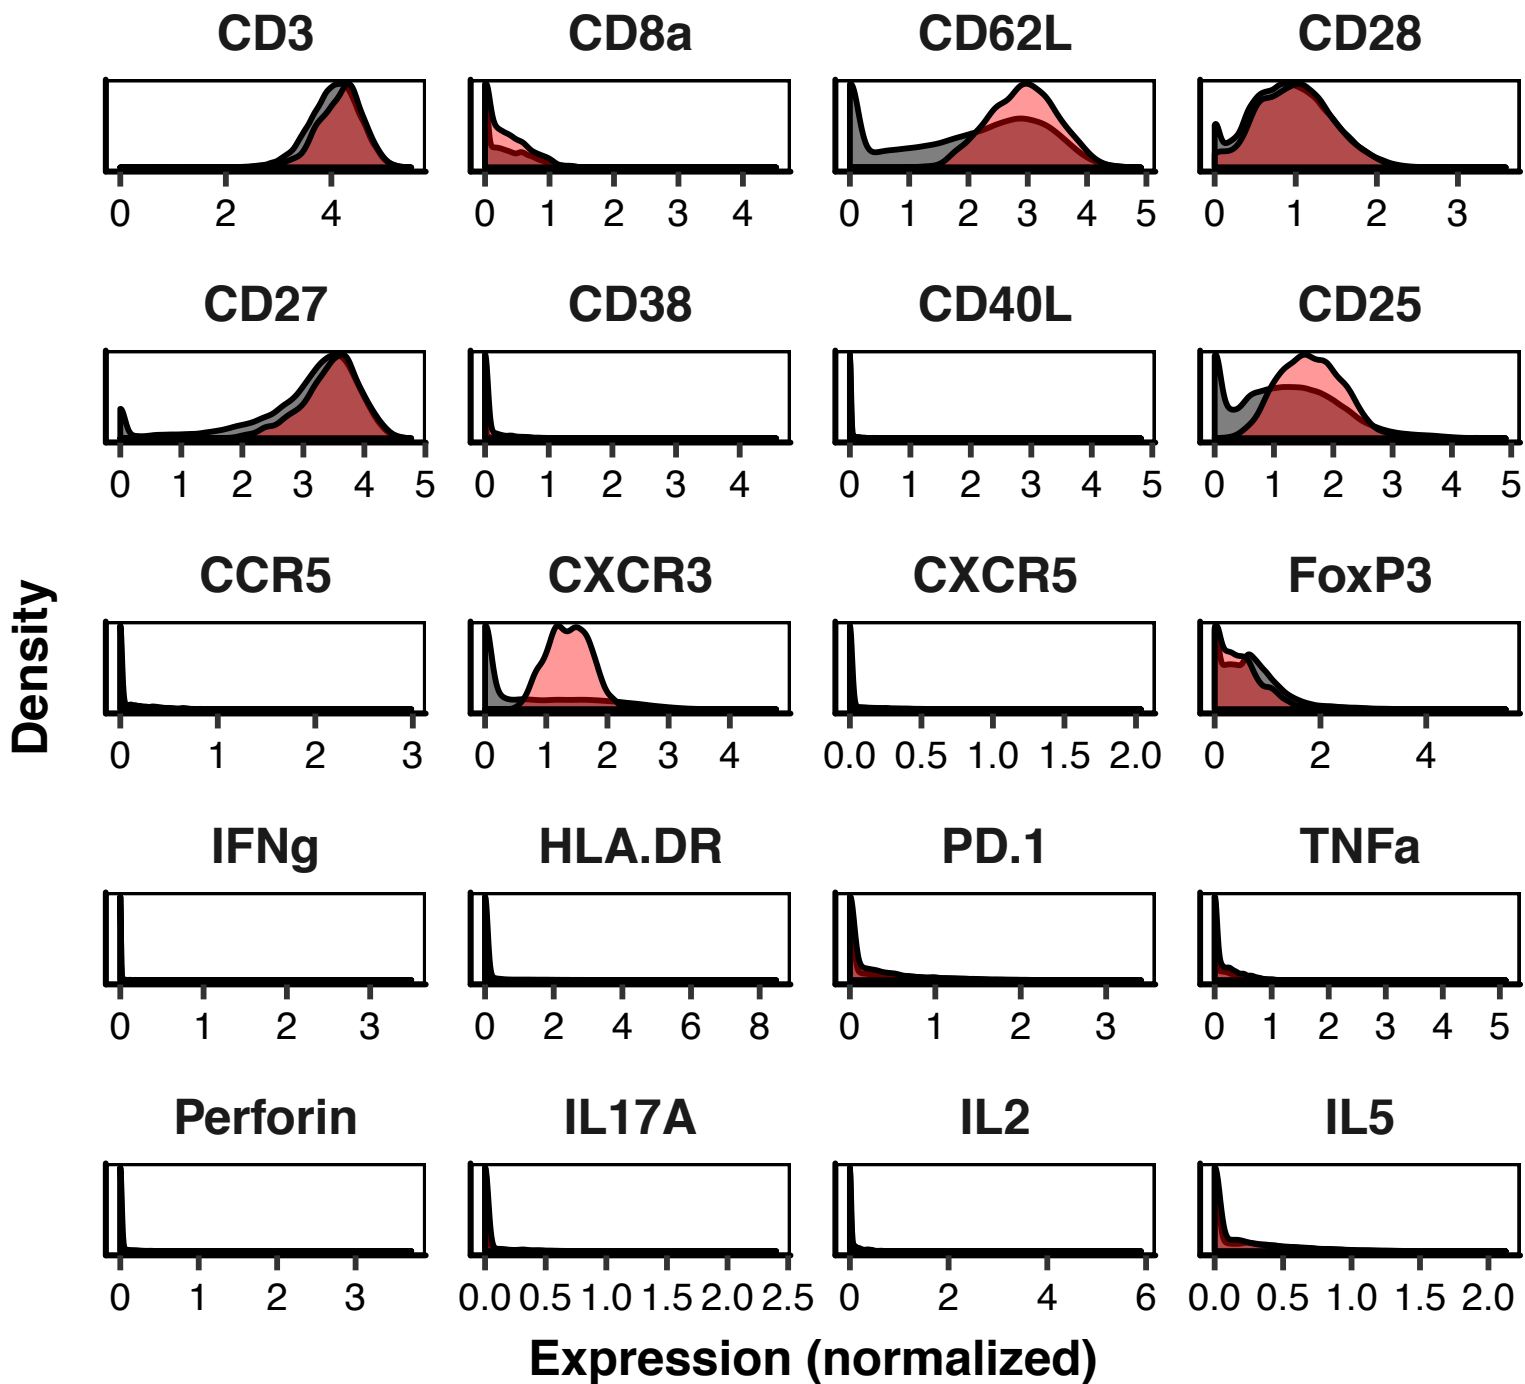

# Cluster 7 – Resting

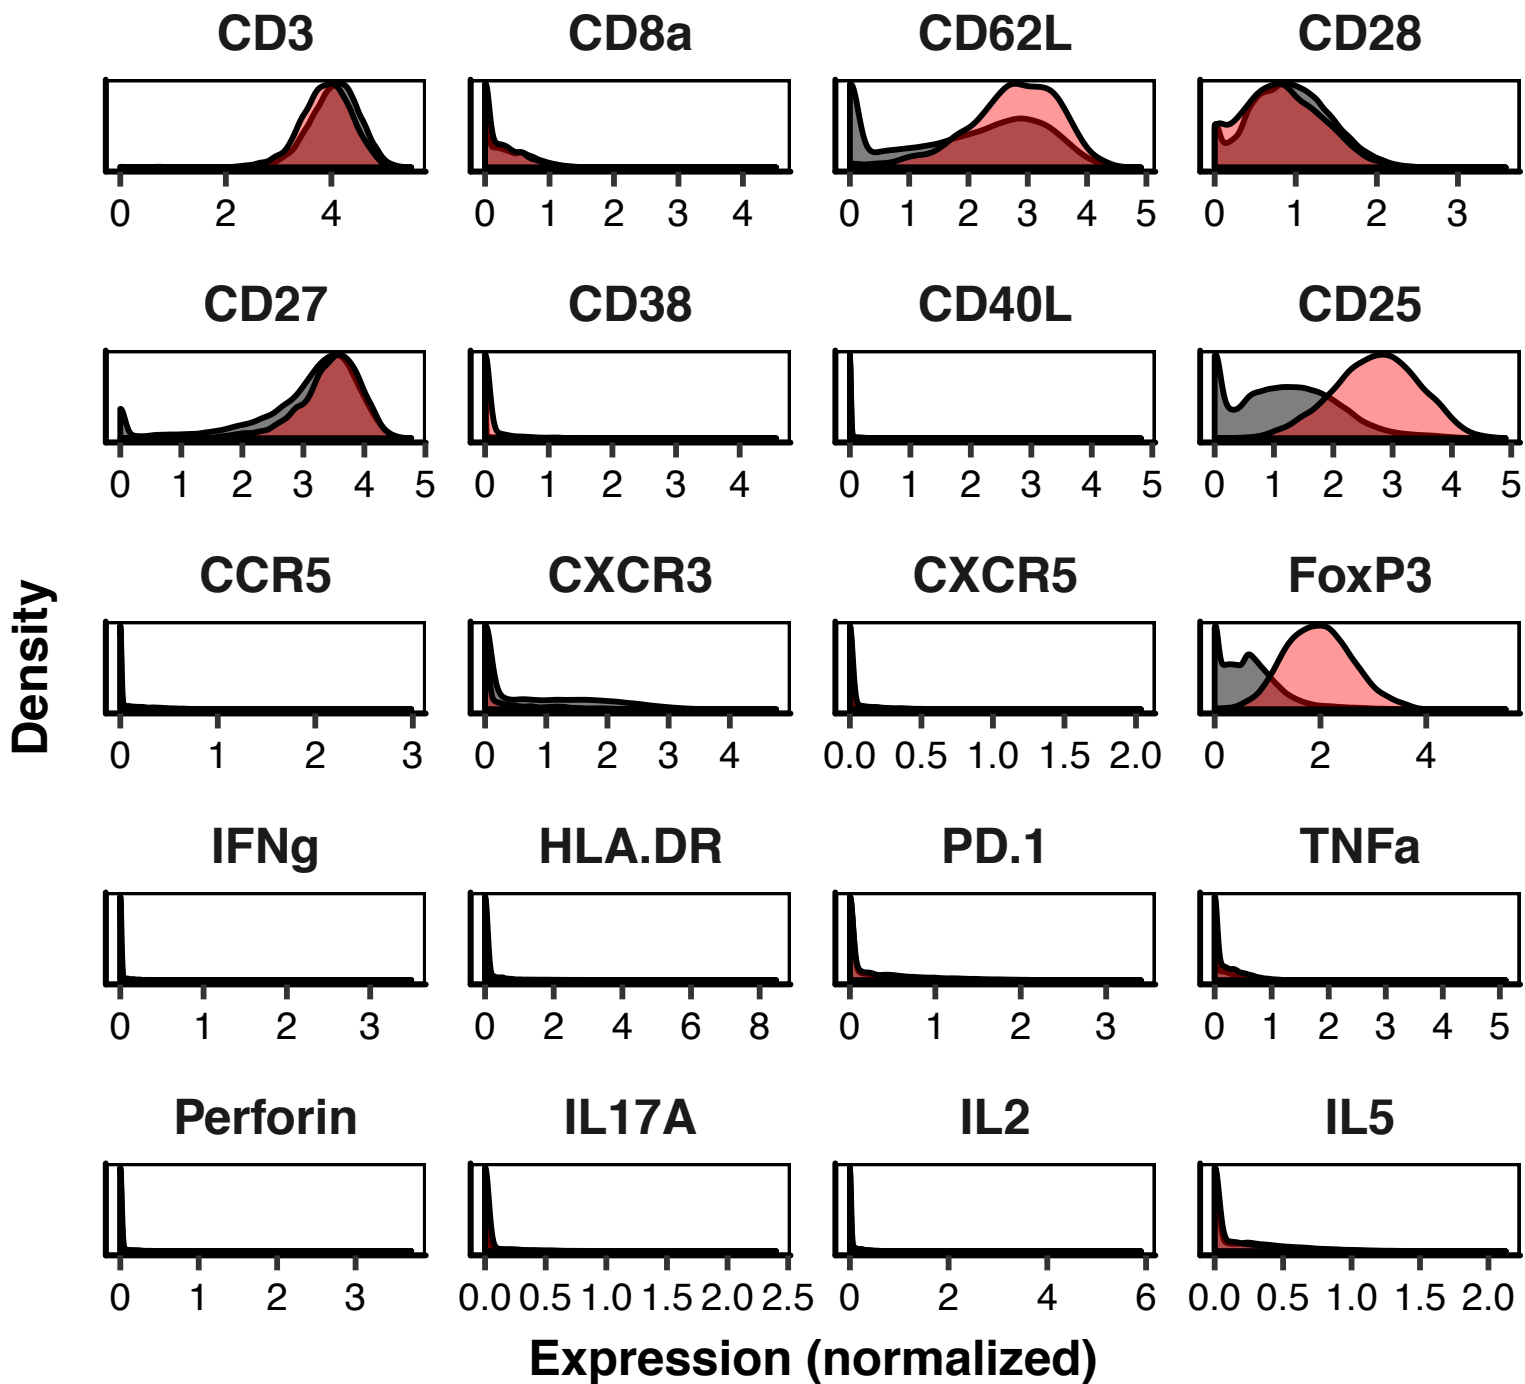

# Cluster 8 – Resting

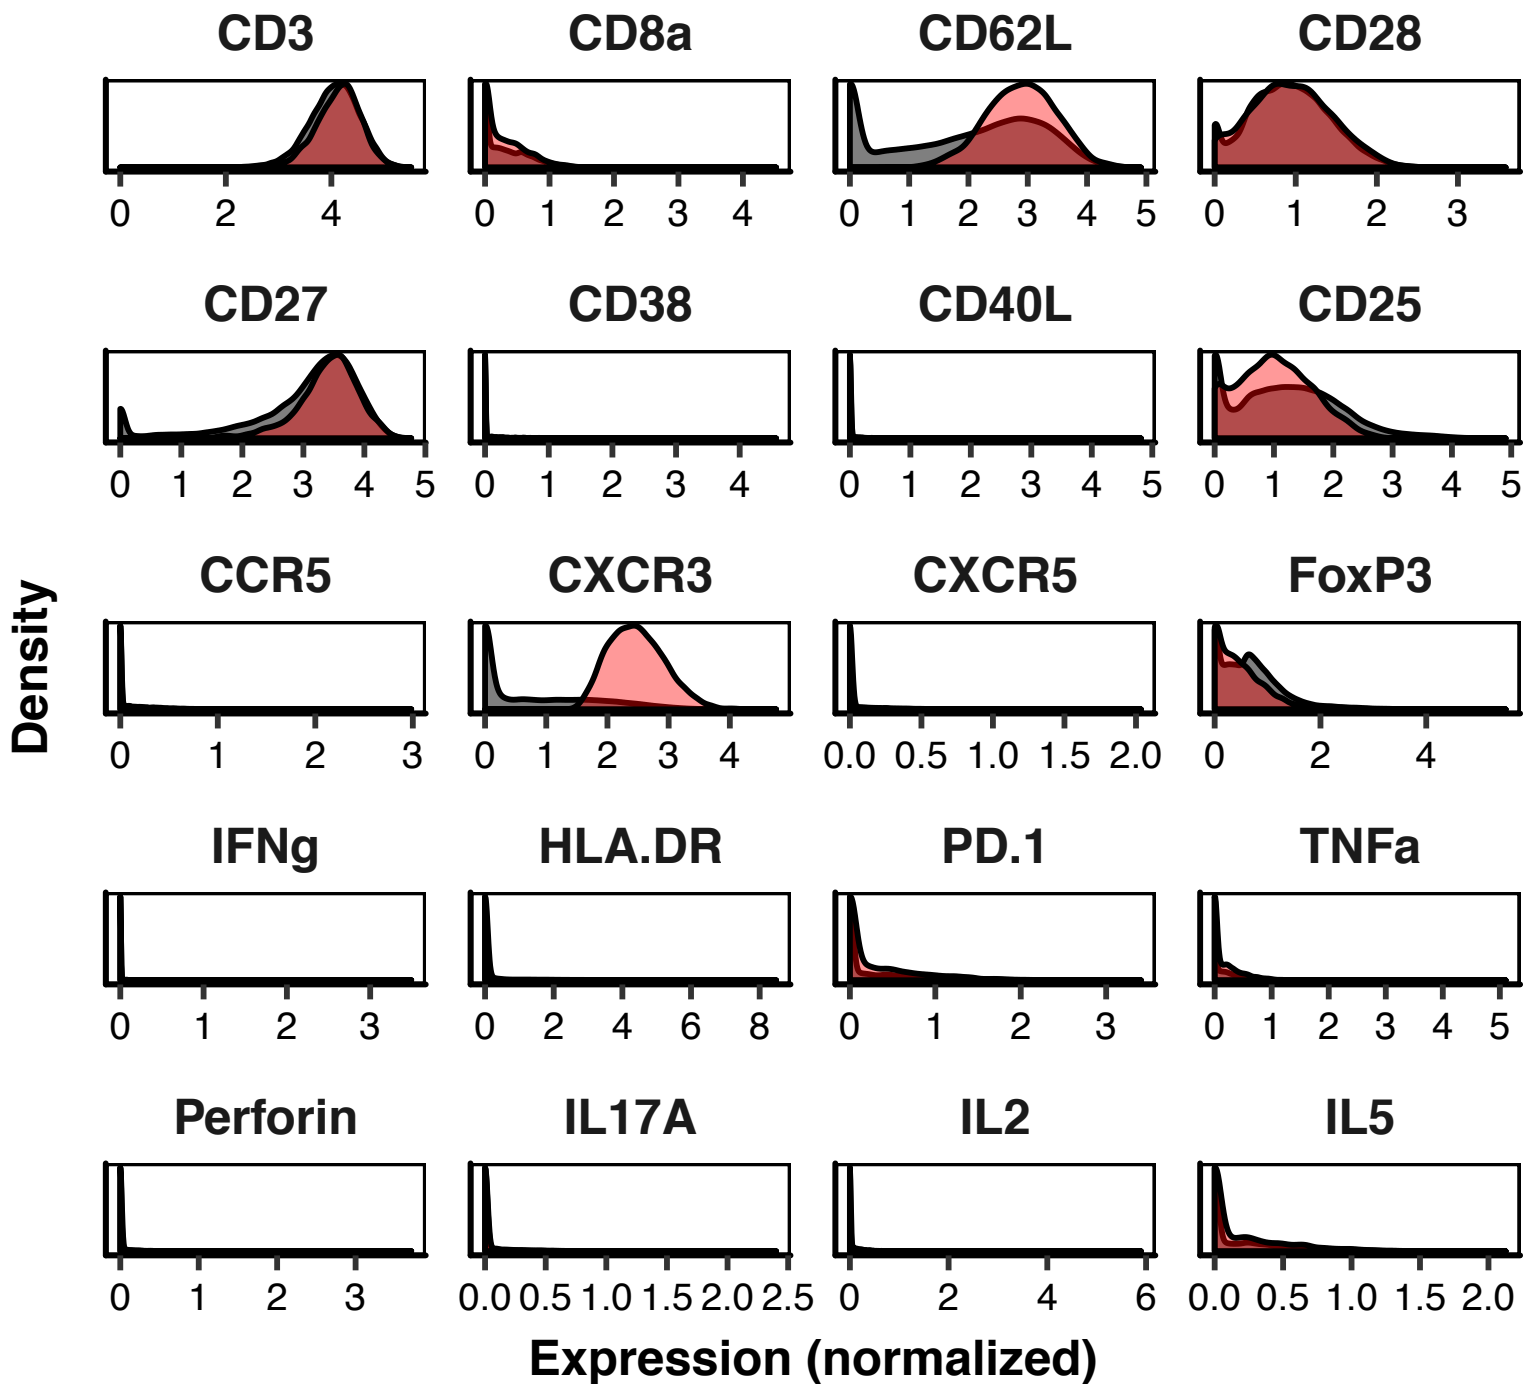



# Cluster 9 – Resting

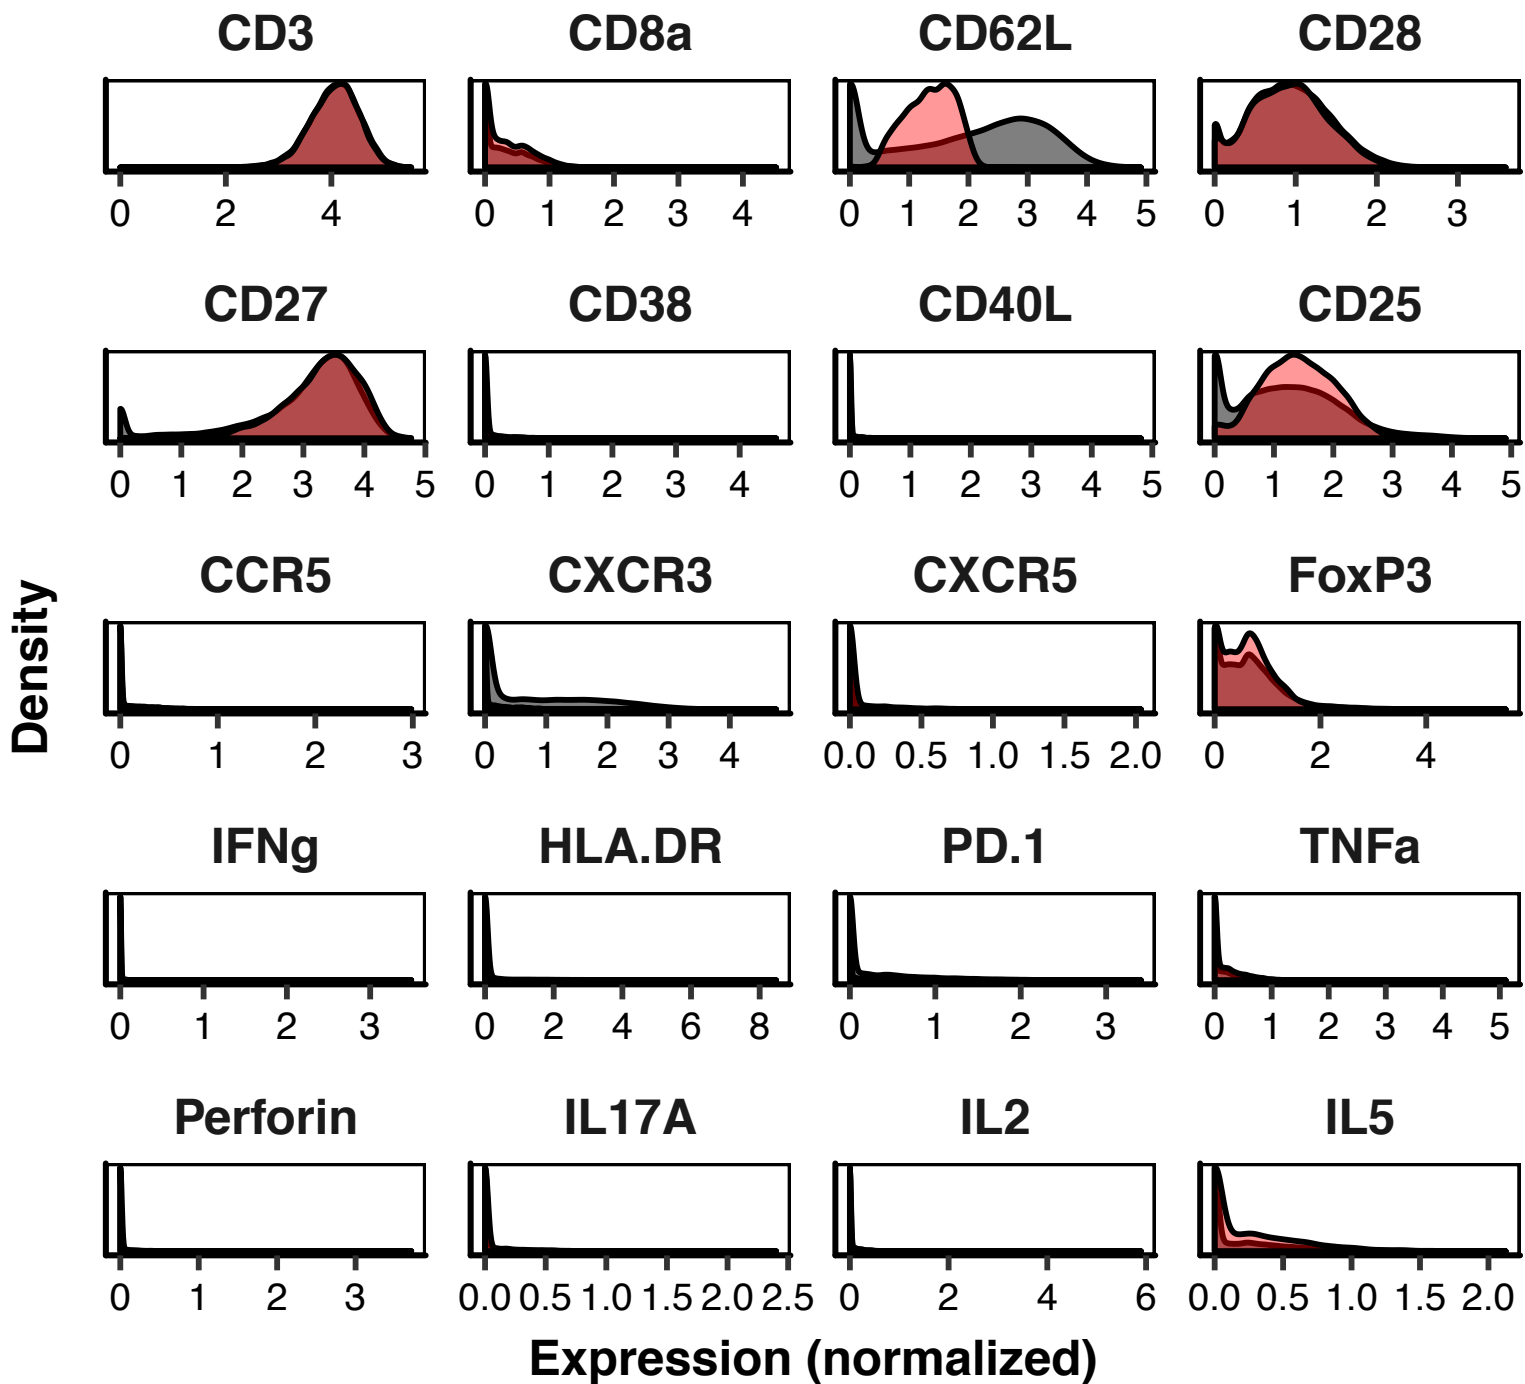

# Cluster 10 – Resting

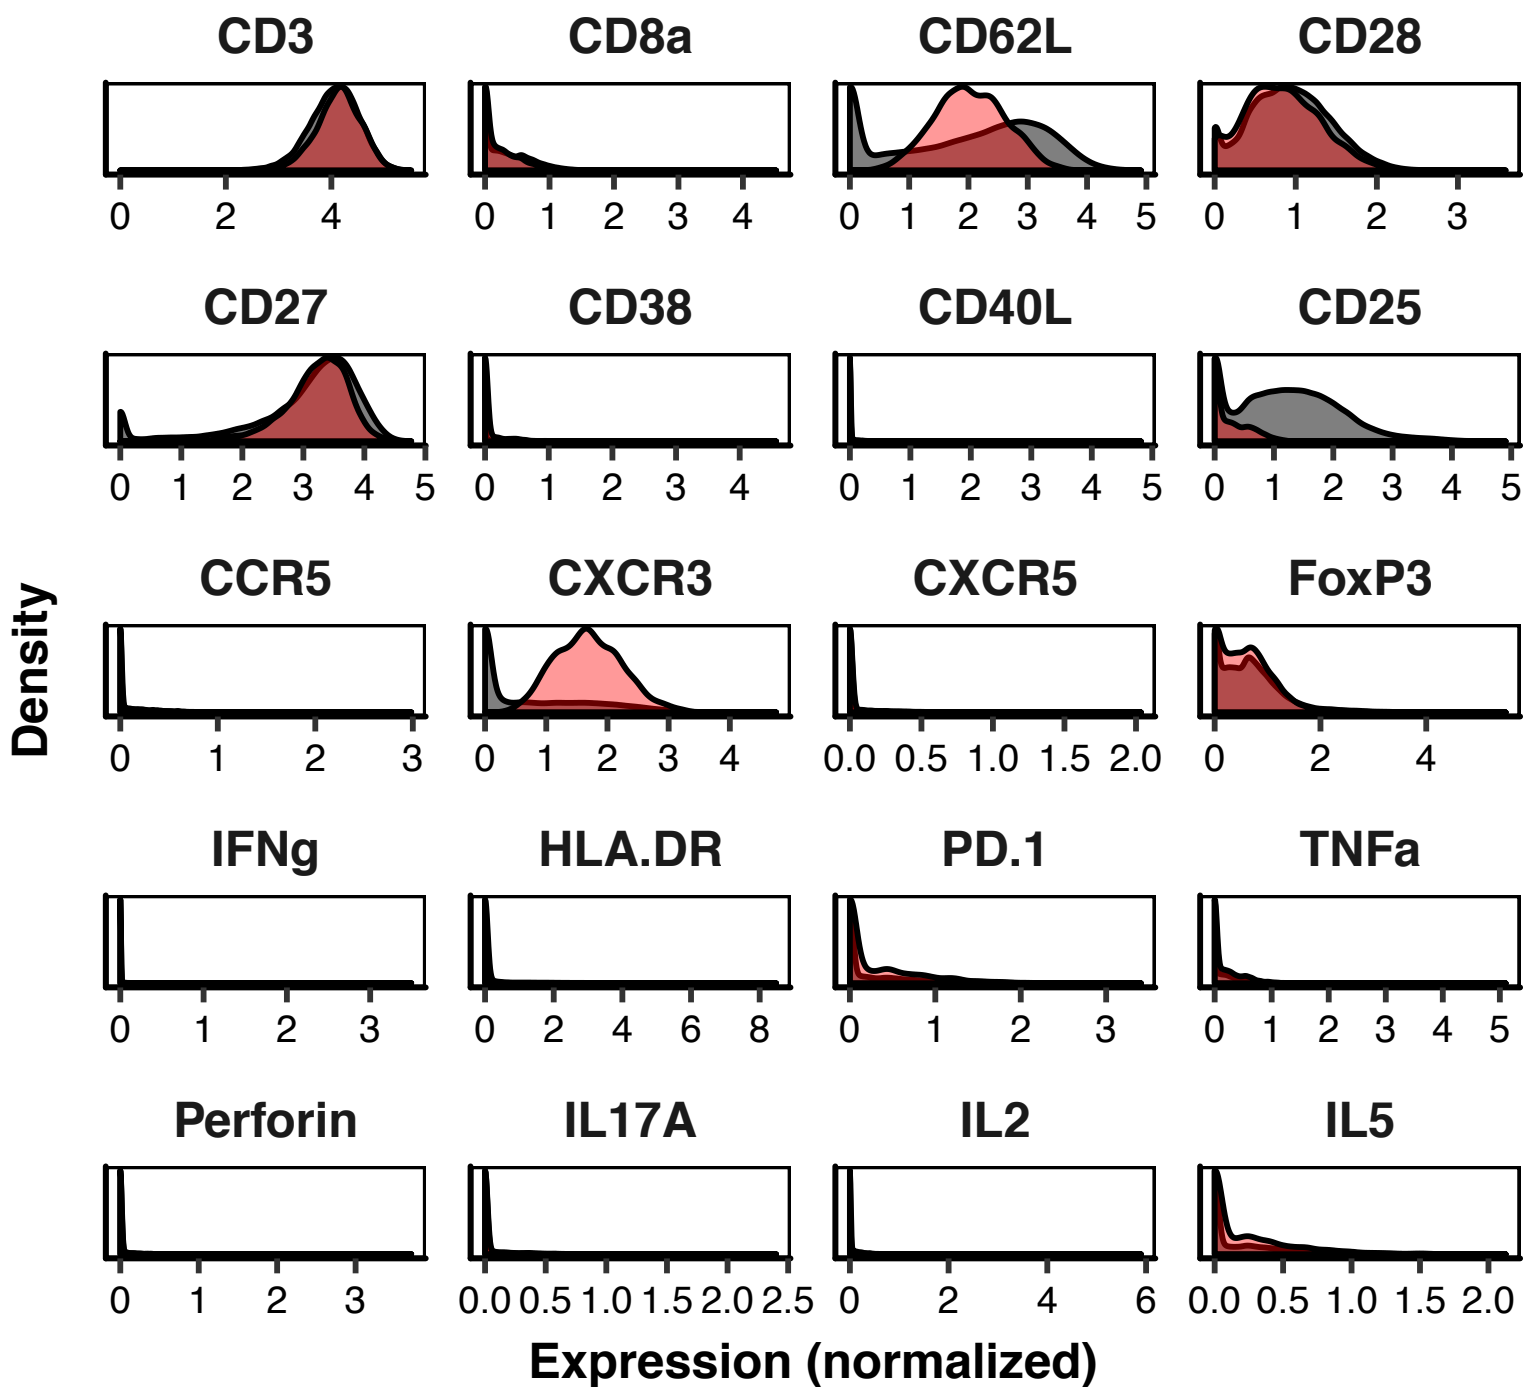

# Cluster 11 – Resting

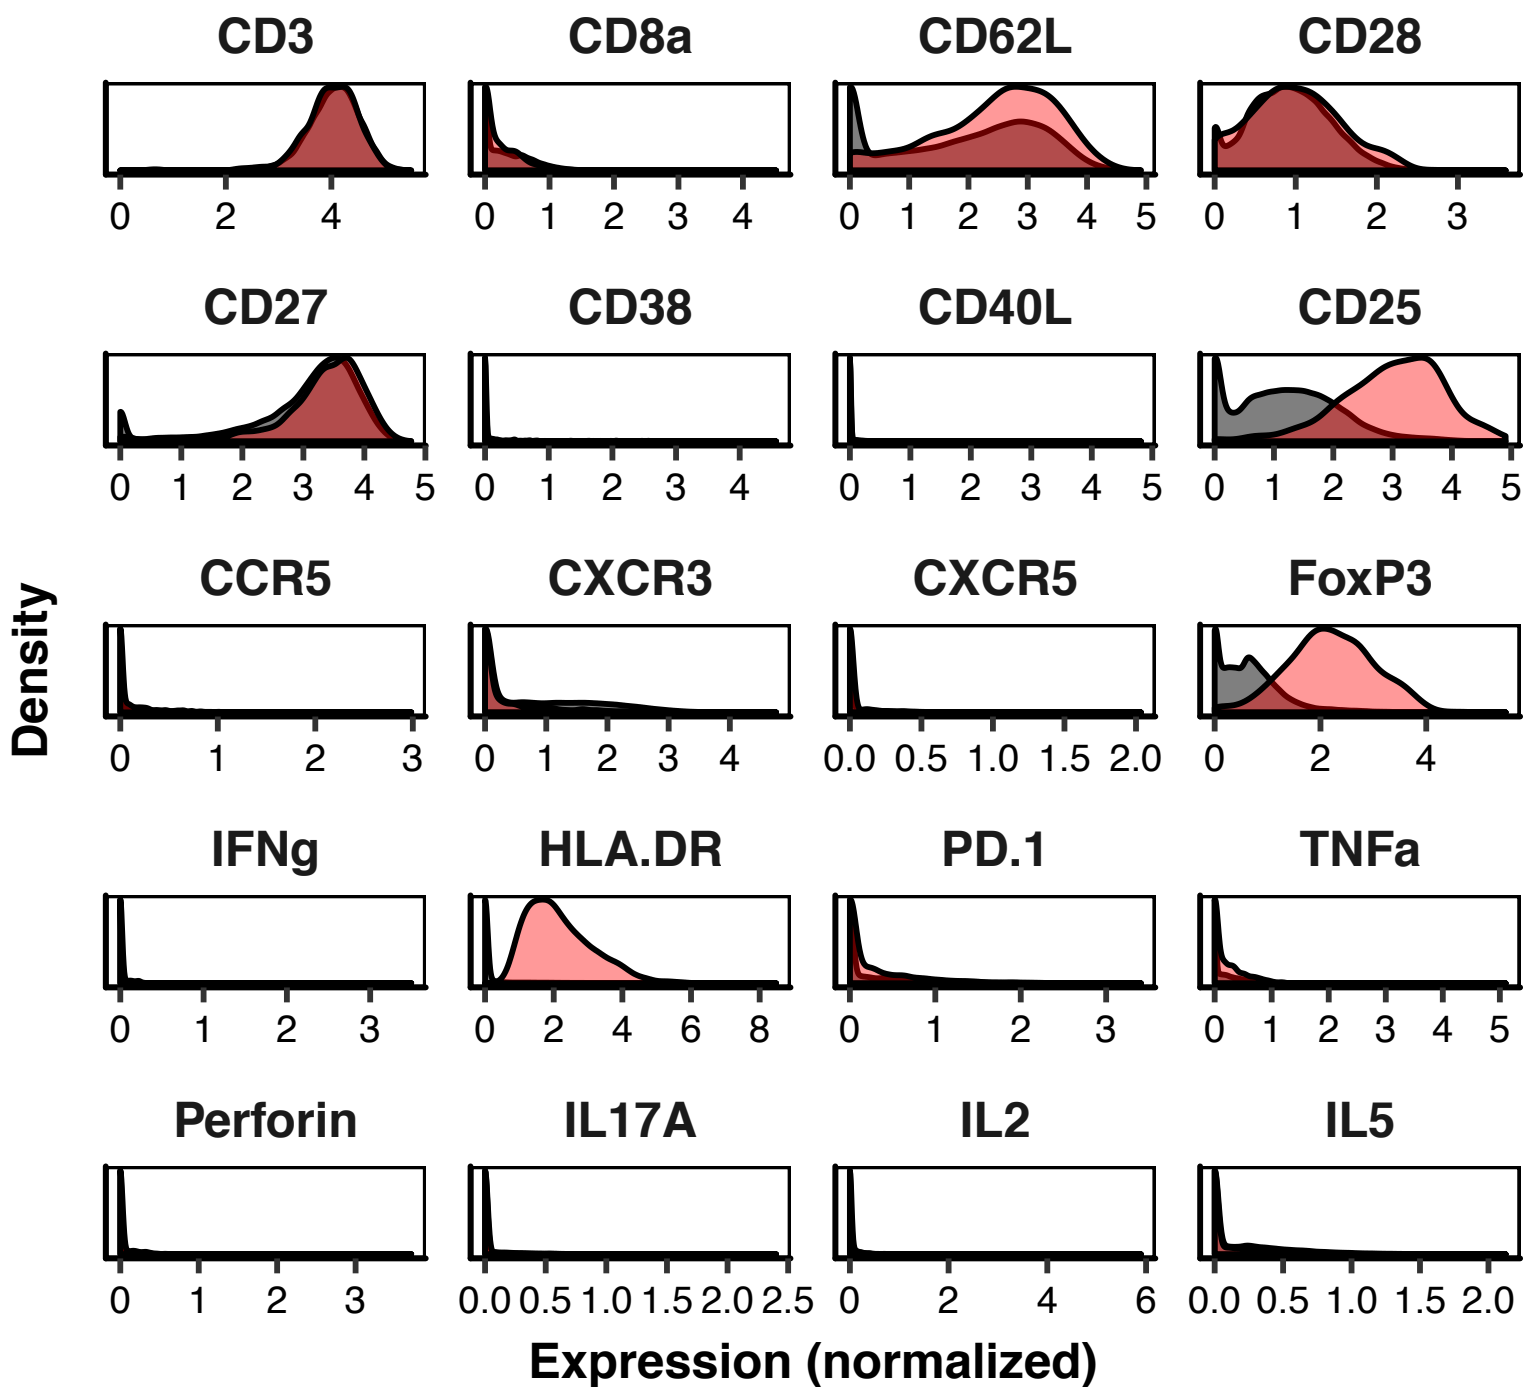

# Cluster 12 – Resting

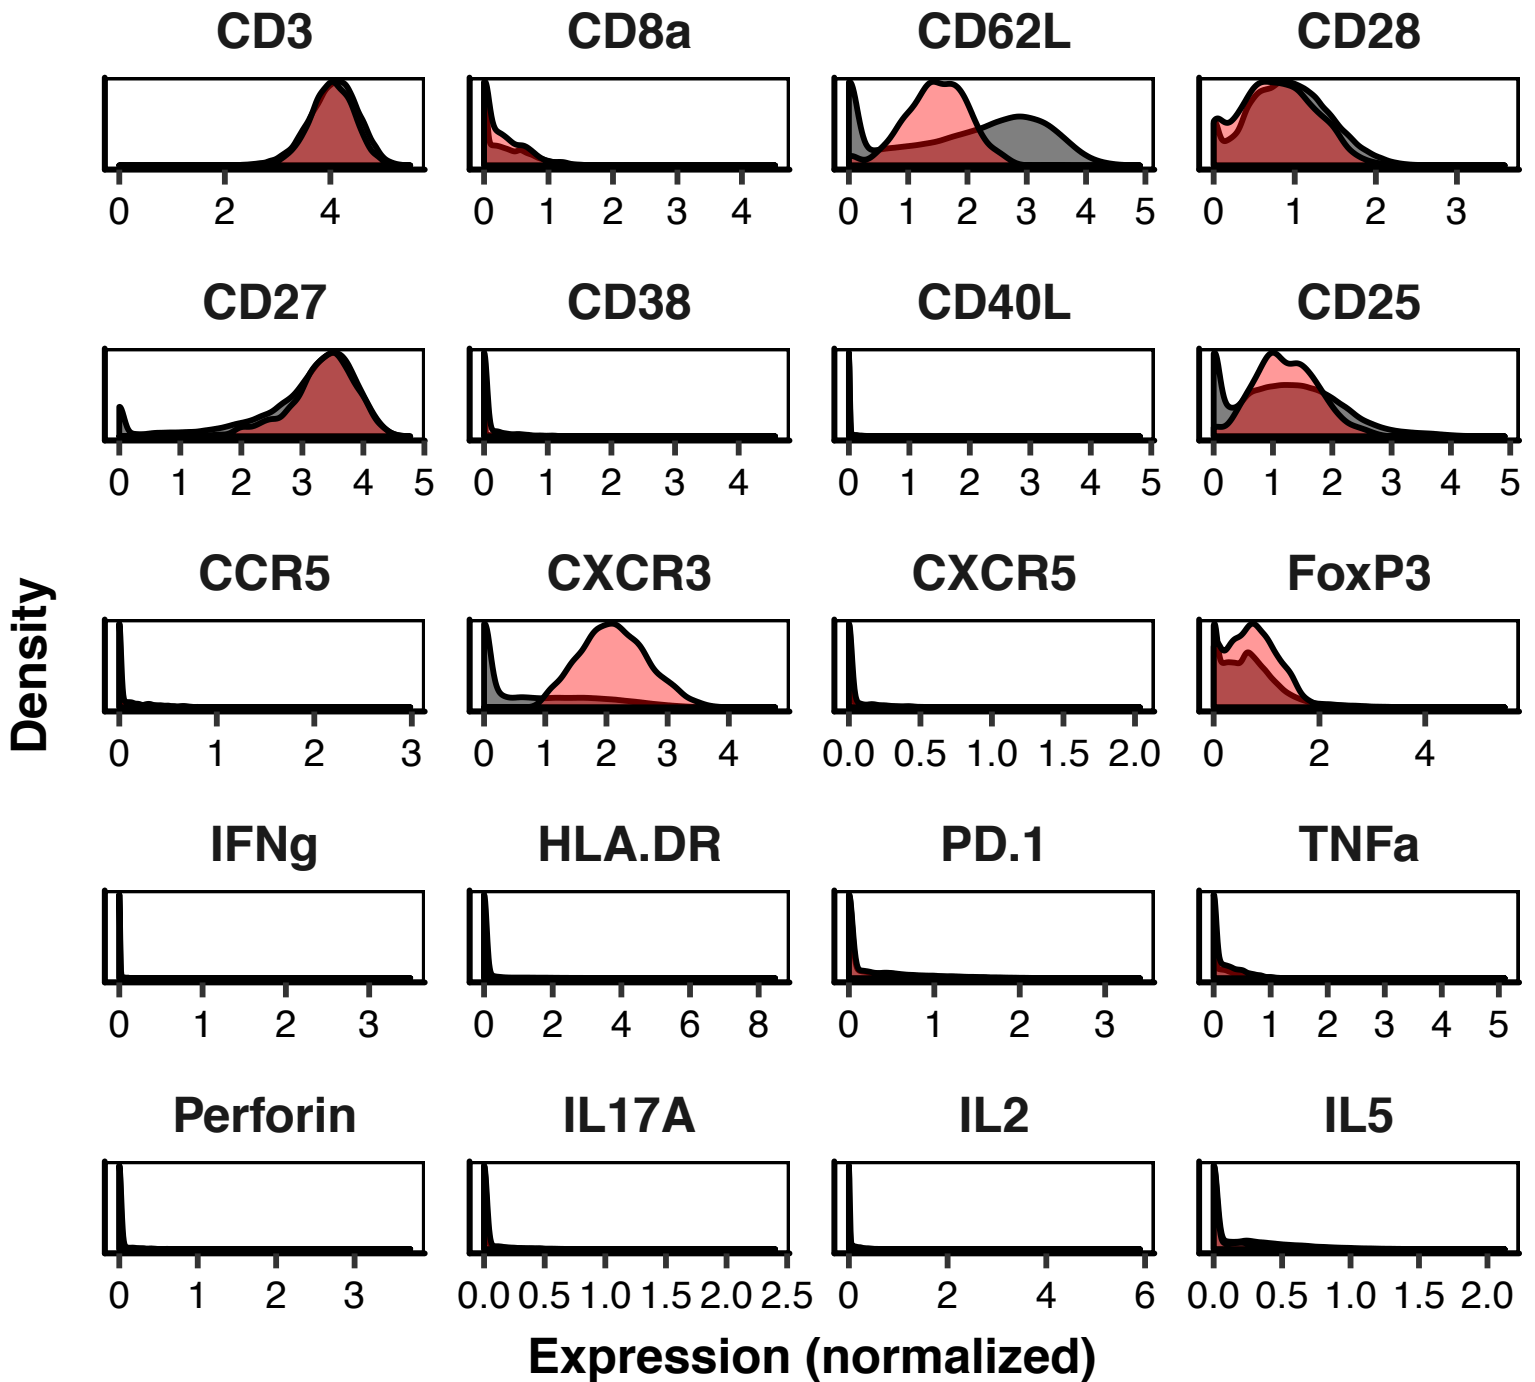

# Cluster 13 – Resting

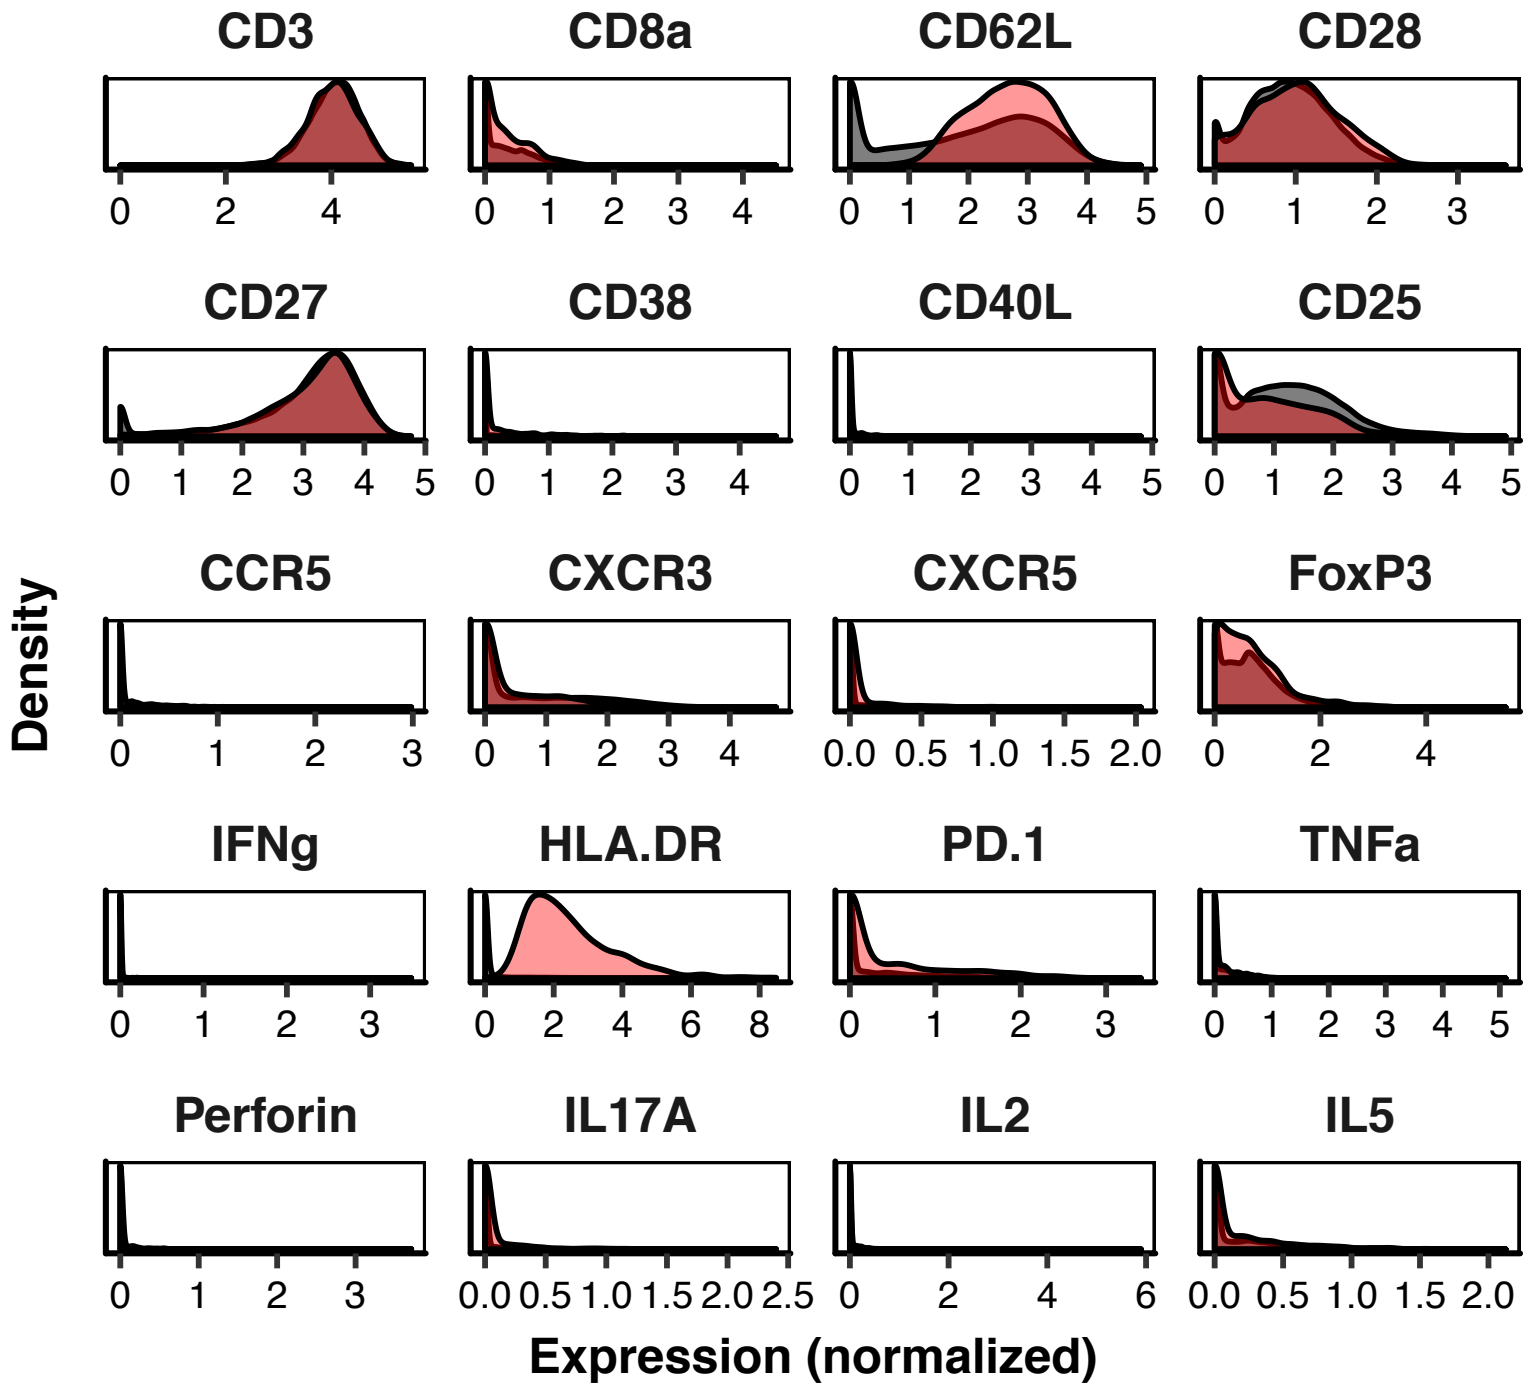

# Cluster 14 – Resting

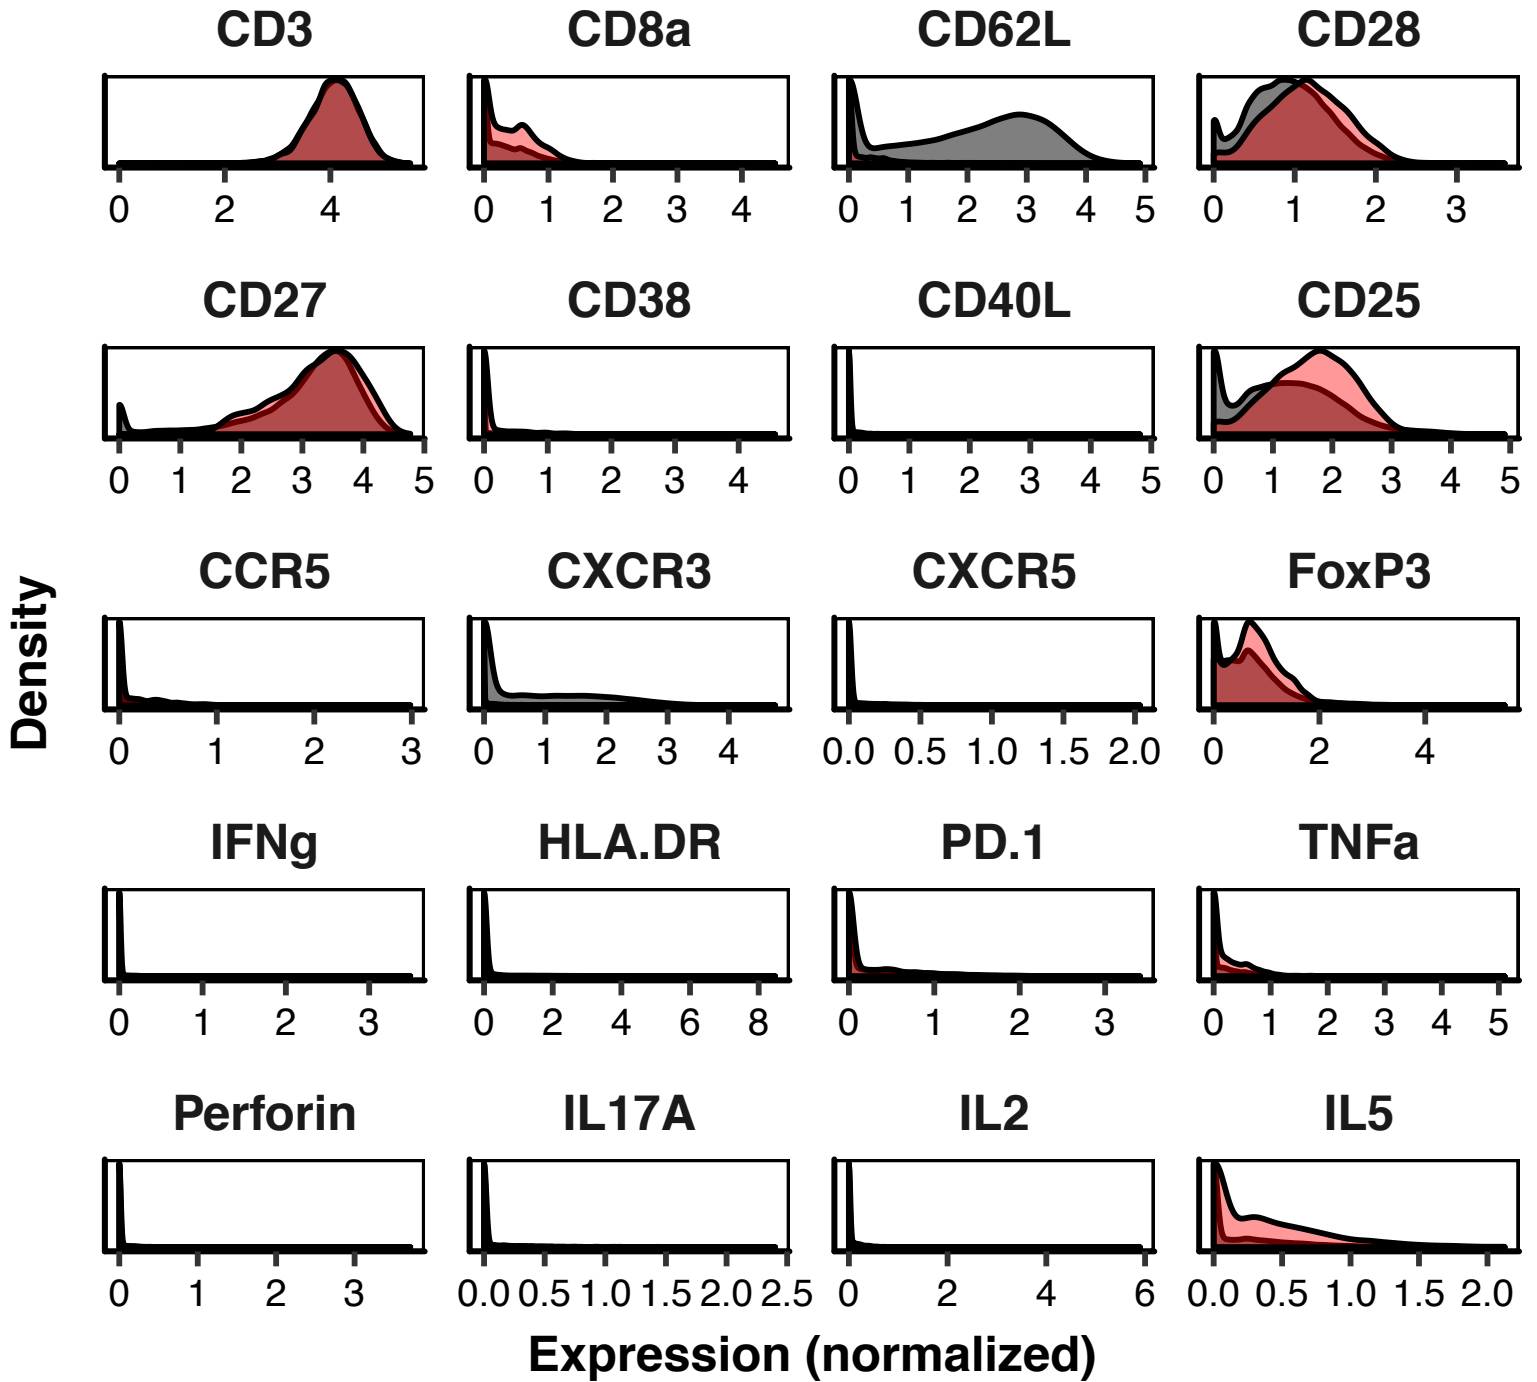

# Cluster 15 – Resting

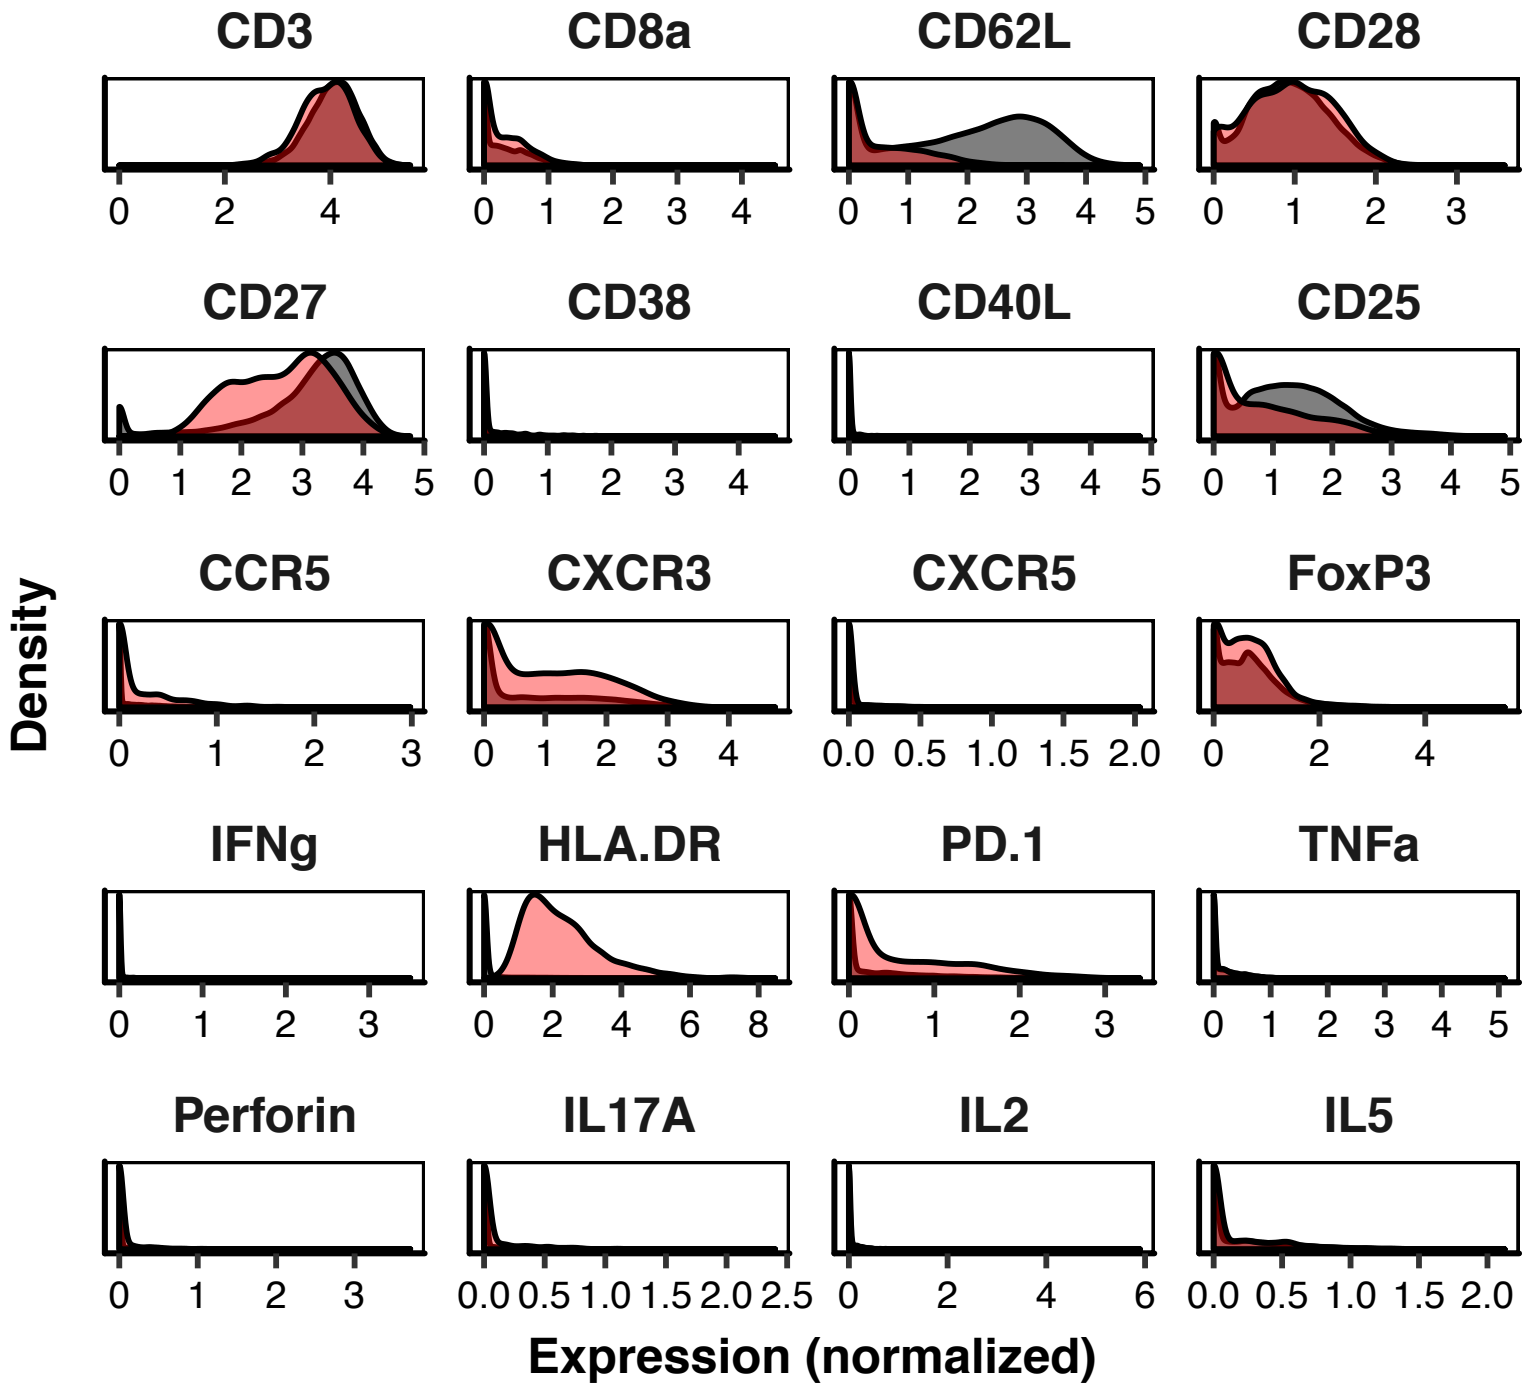

# Cluster 16 – Resting

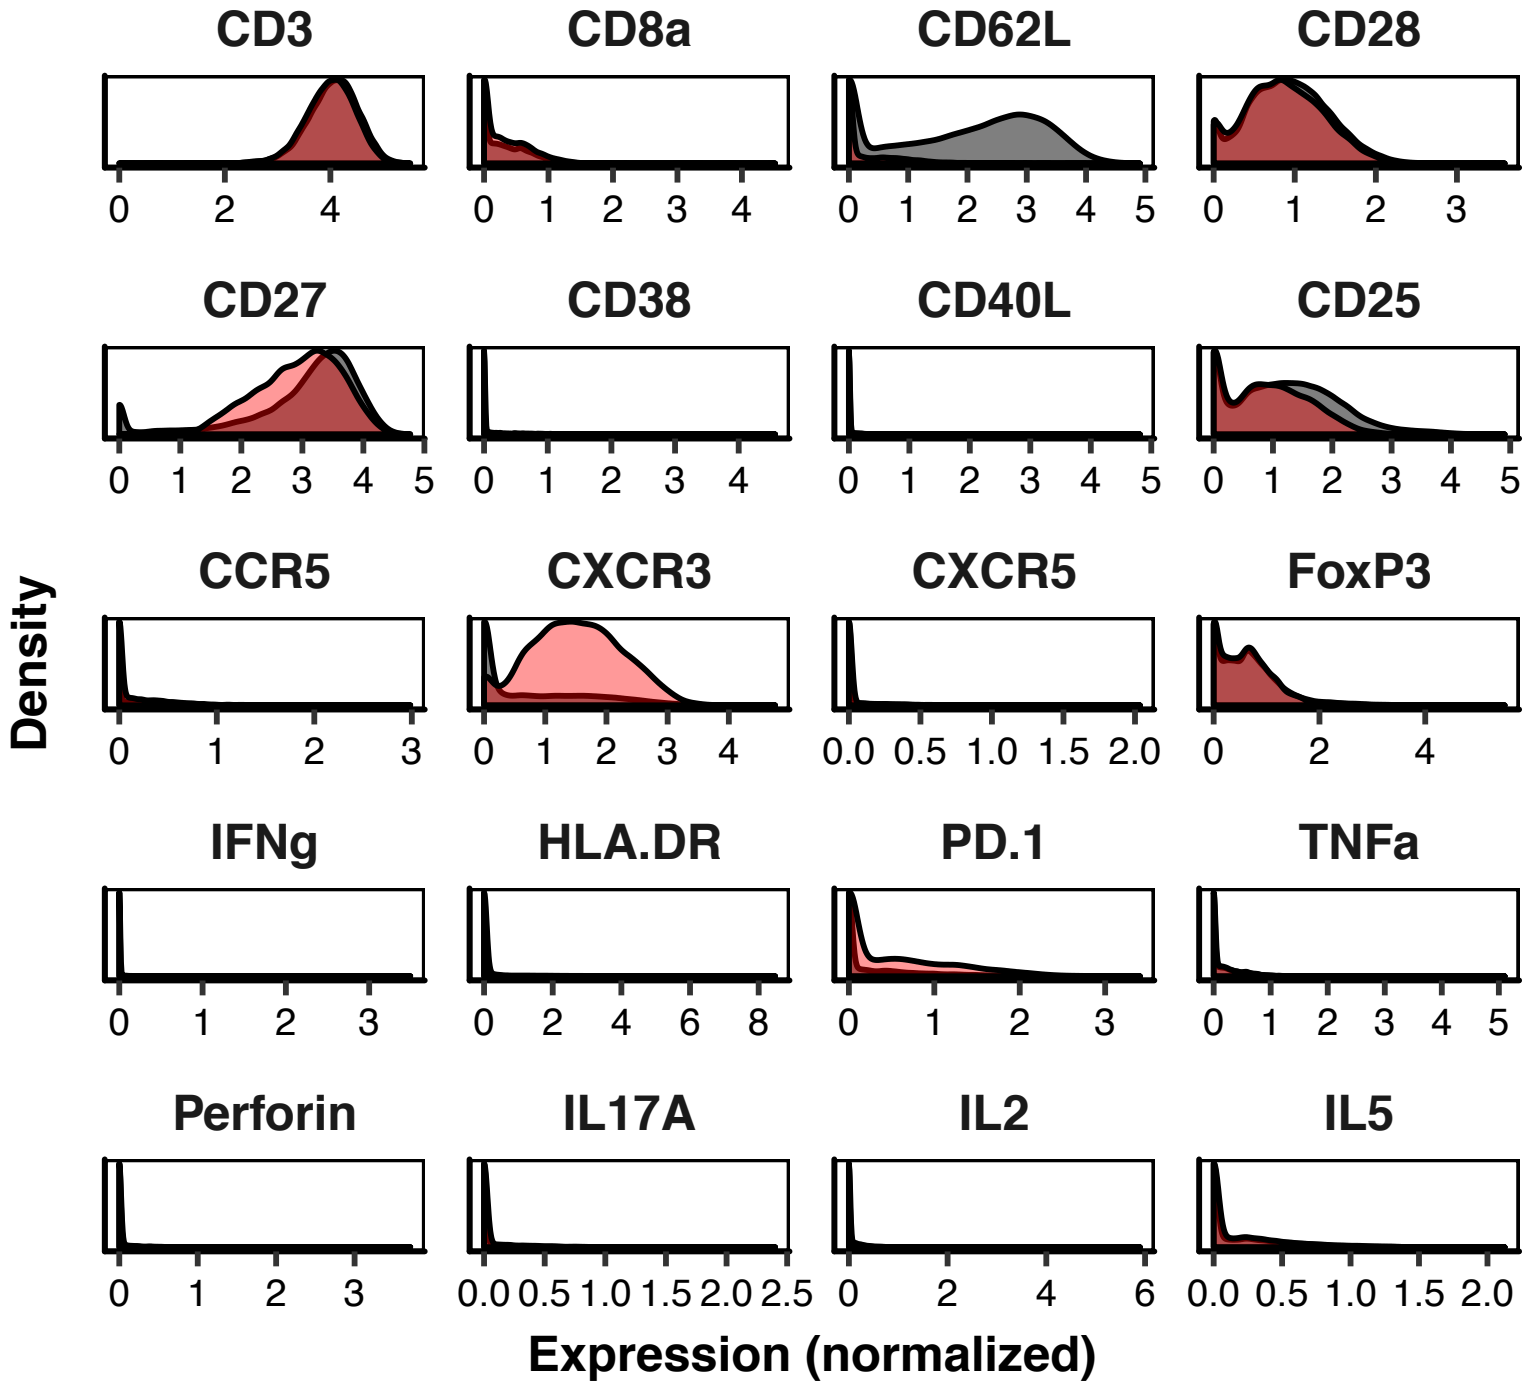



# Cluster 17 – Resting

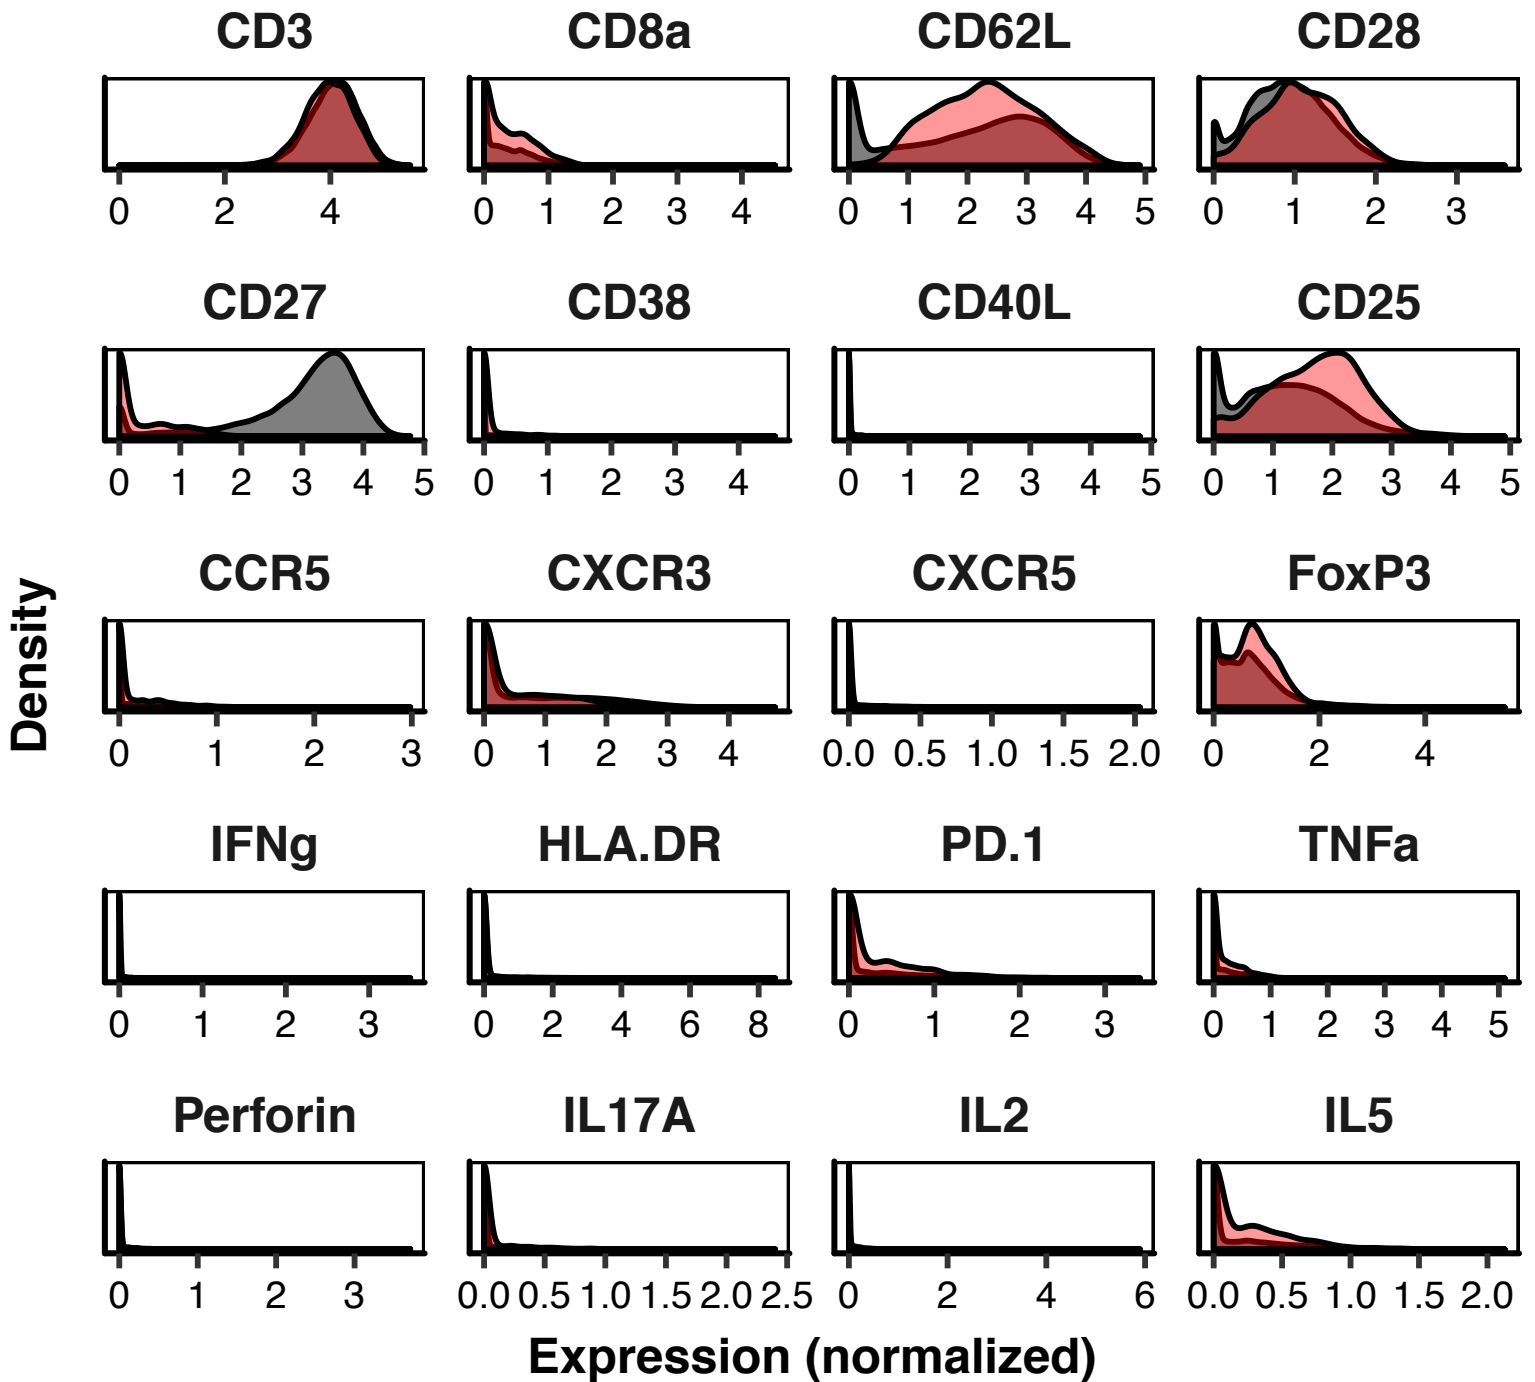

# Cluster 18 – Resting

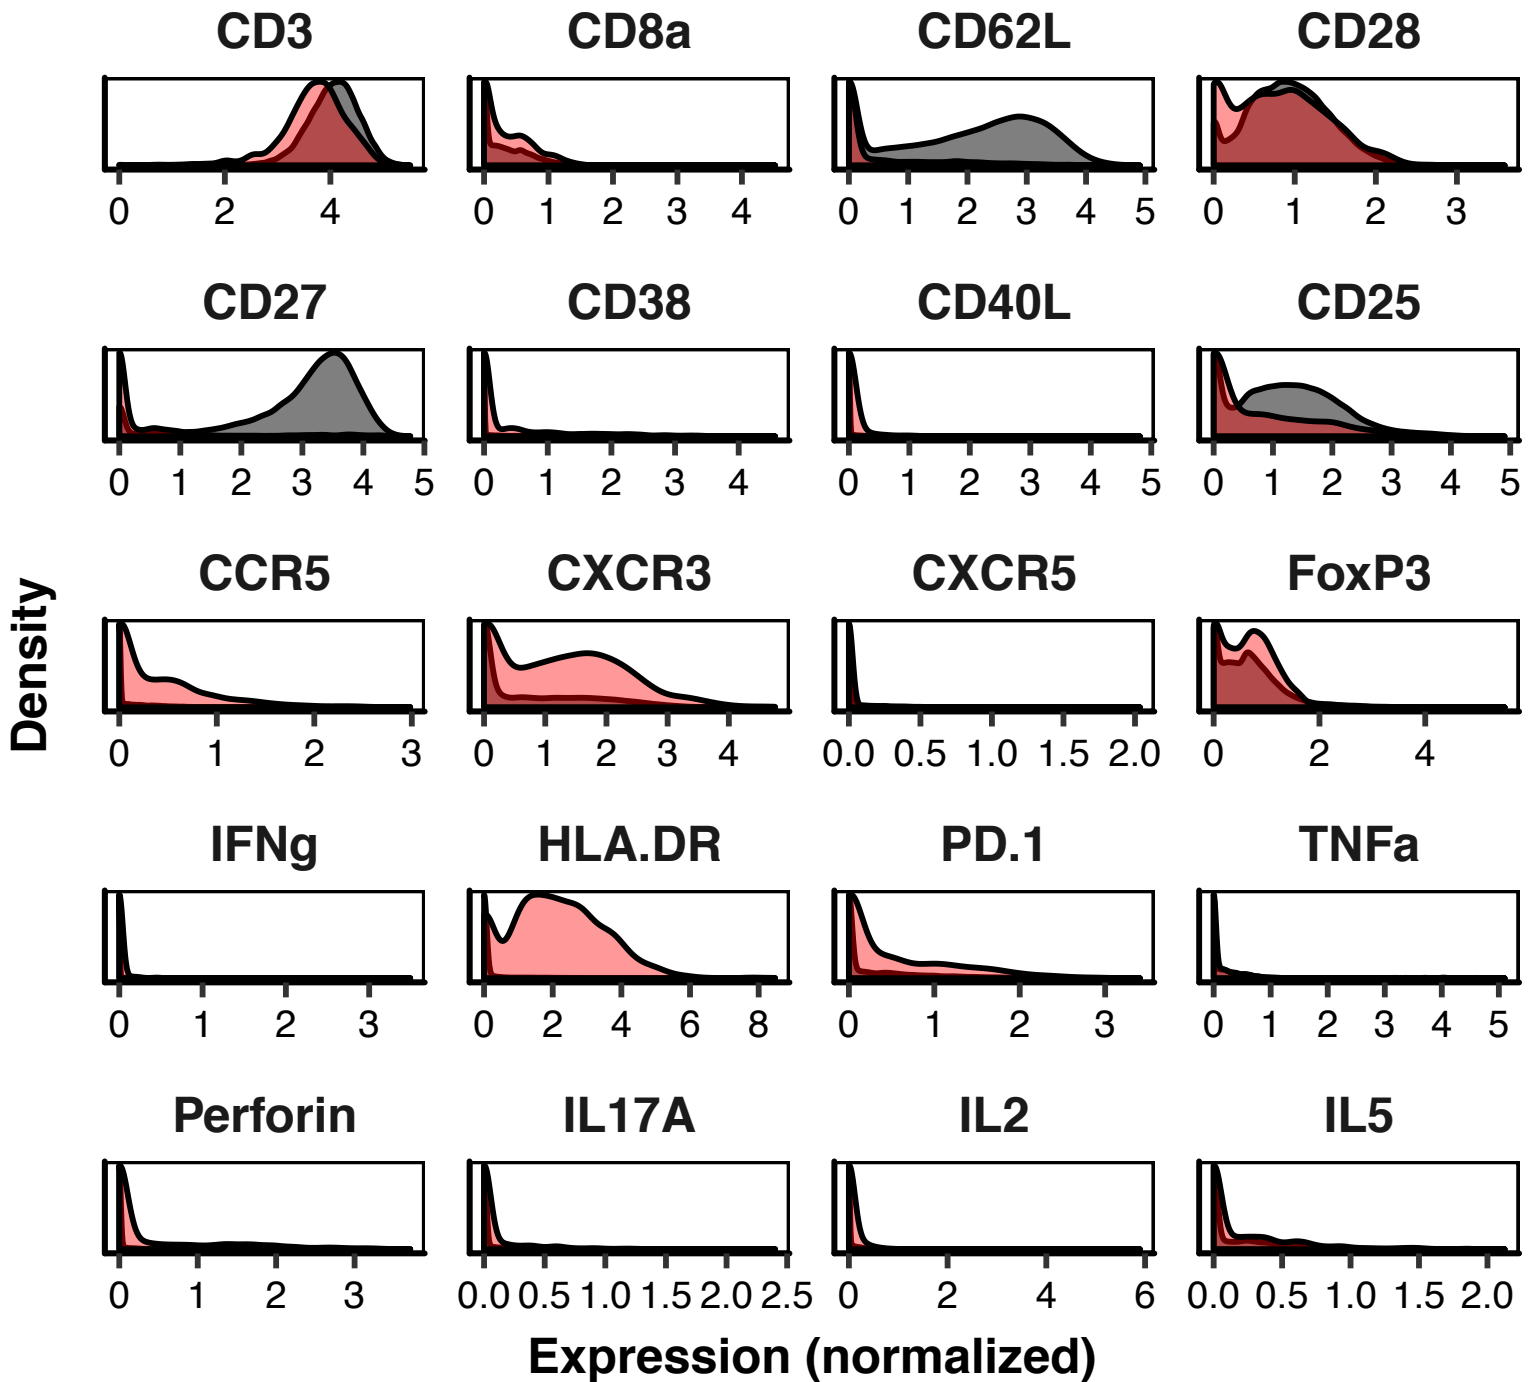

# Cluster 19 – Resting

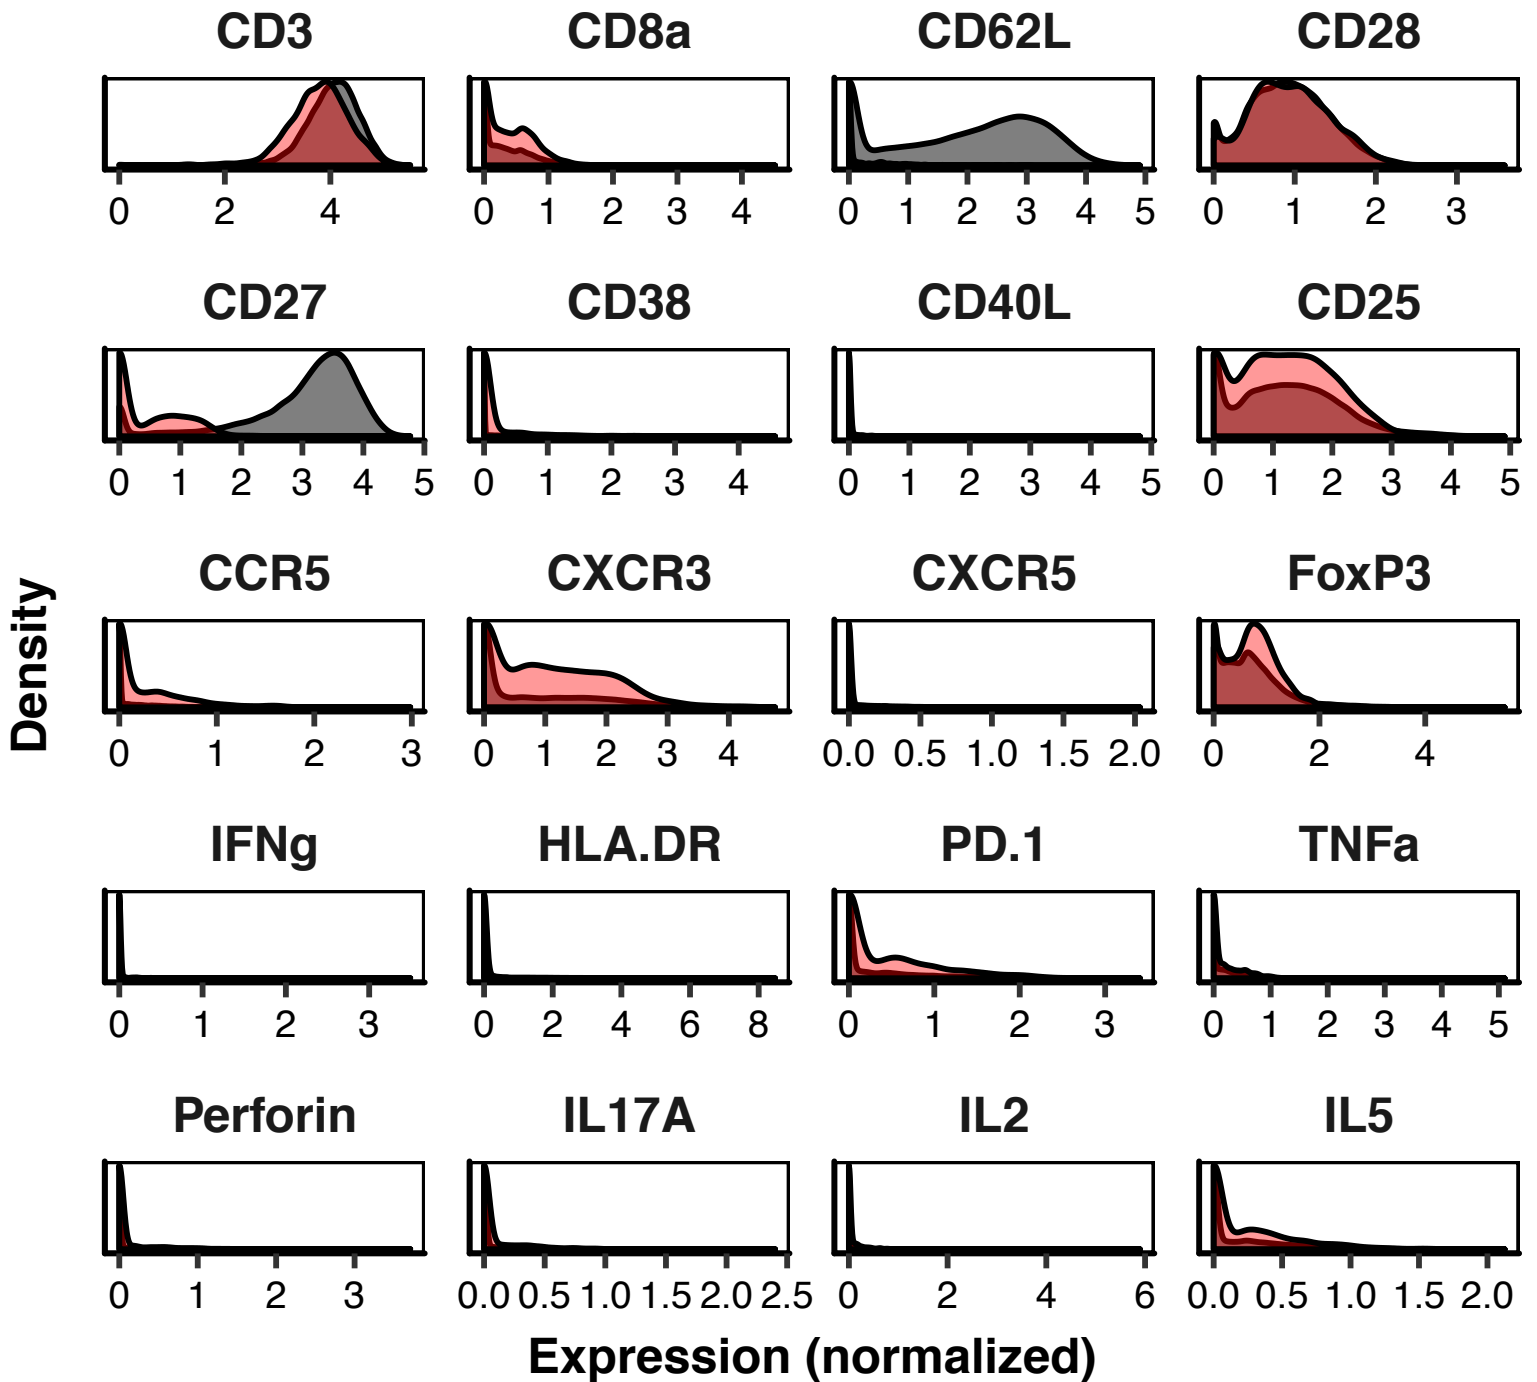

# Cluster 1 – Stimulated

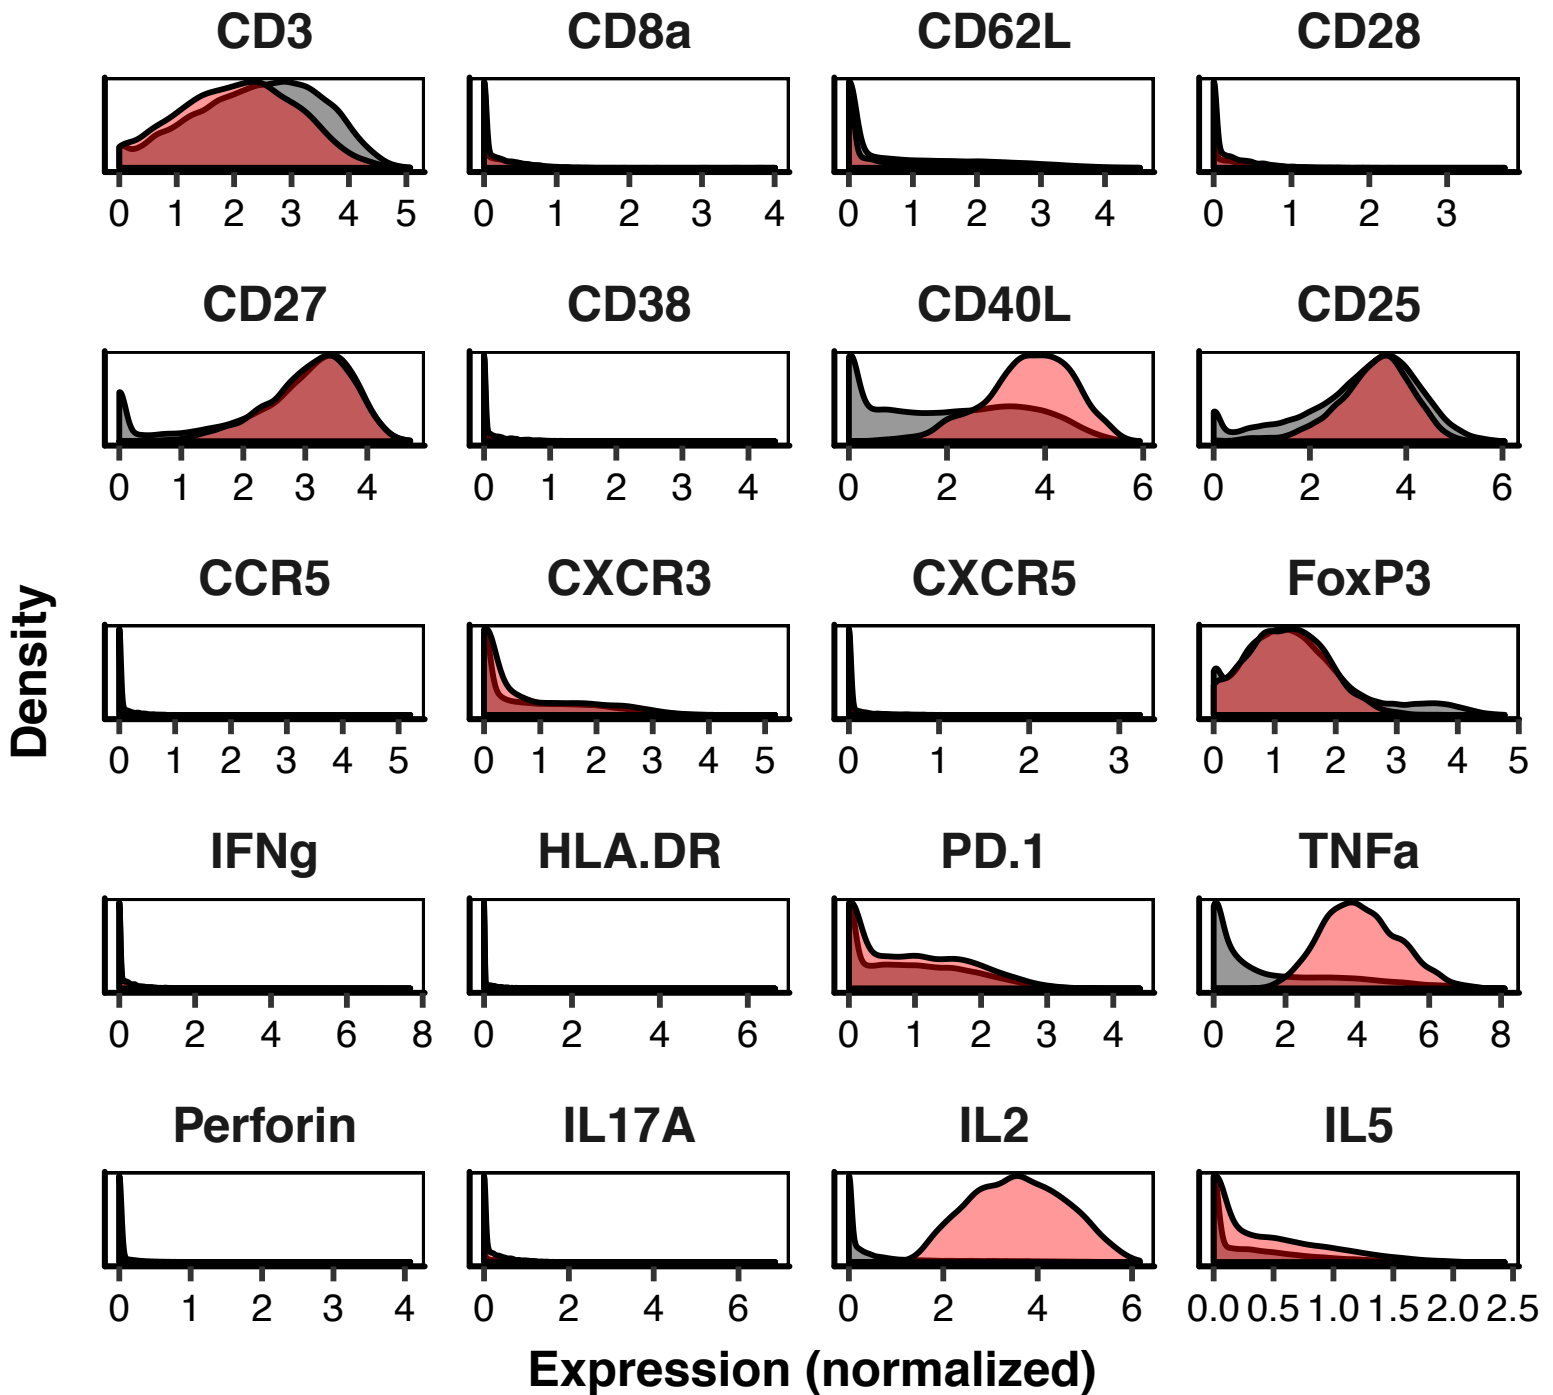

# Cluster 2 – Stimulated

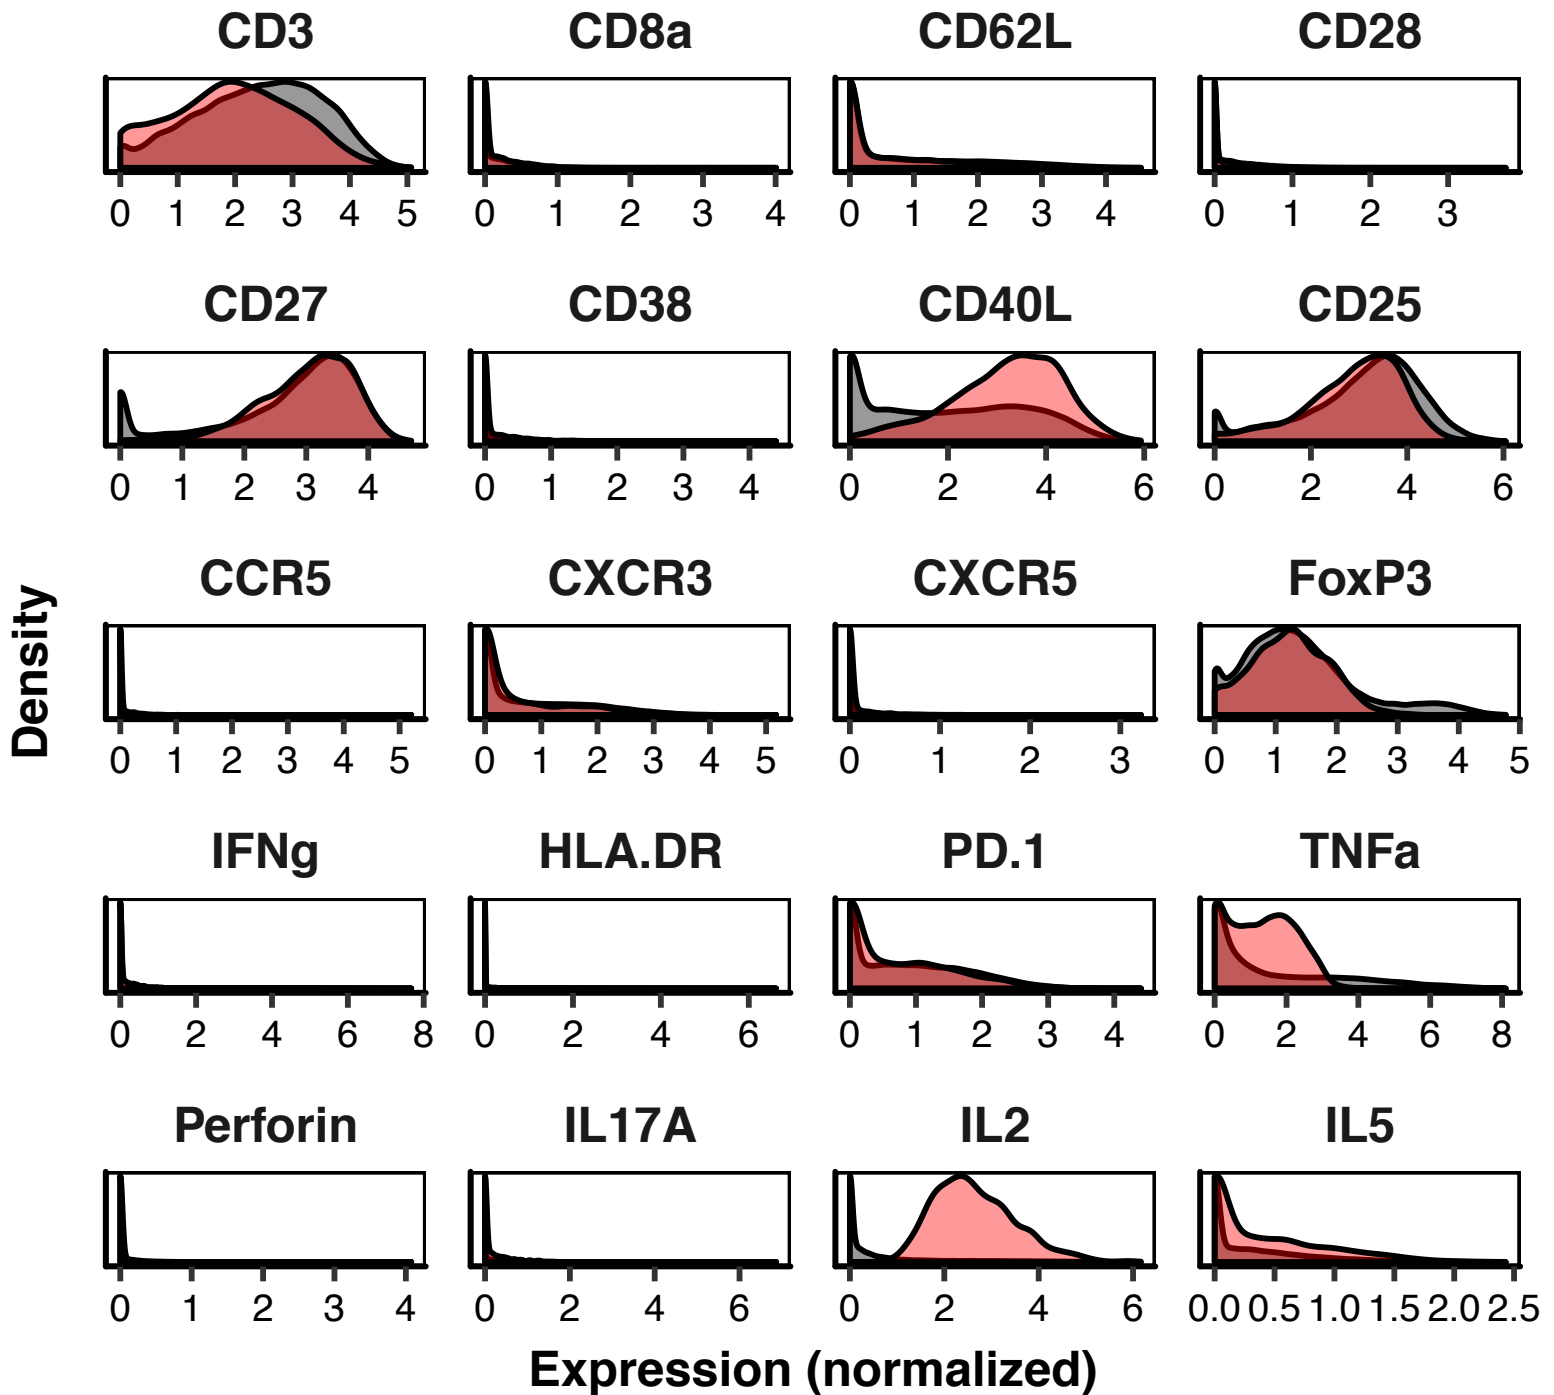

# Cluster 3 – Stimulated

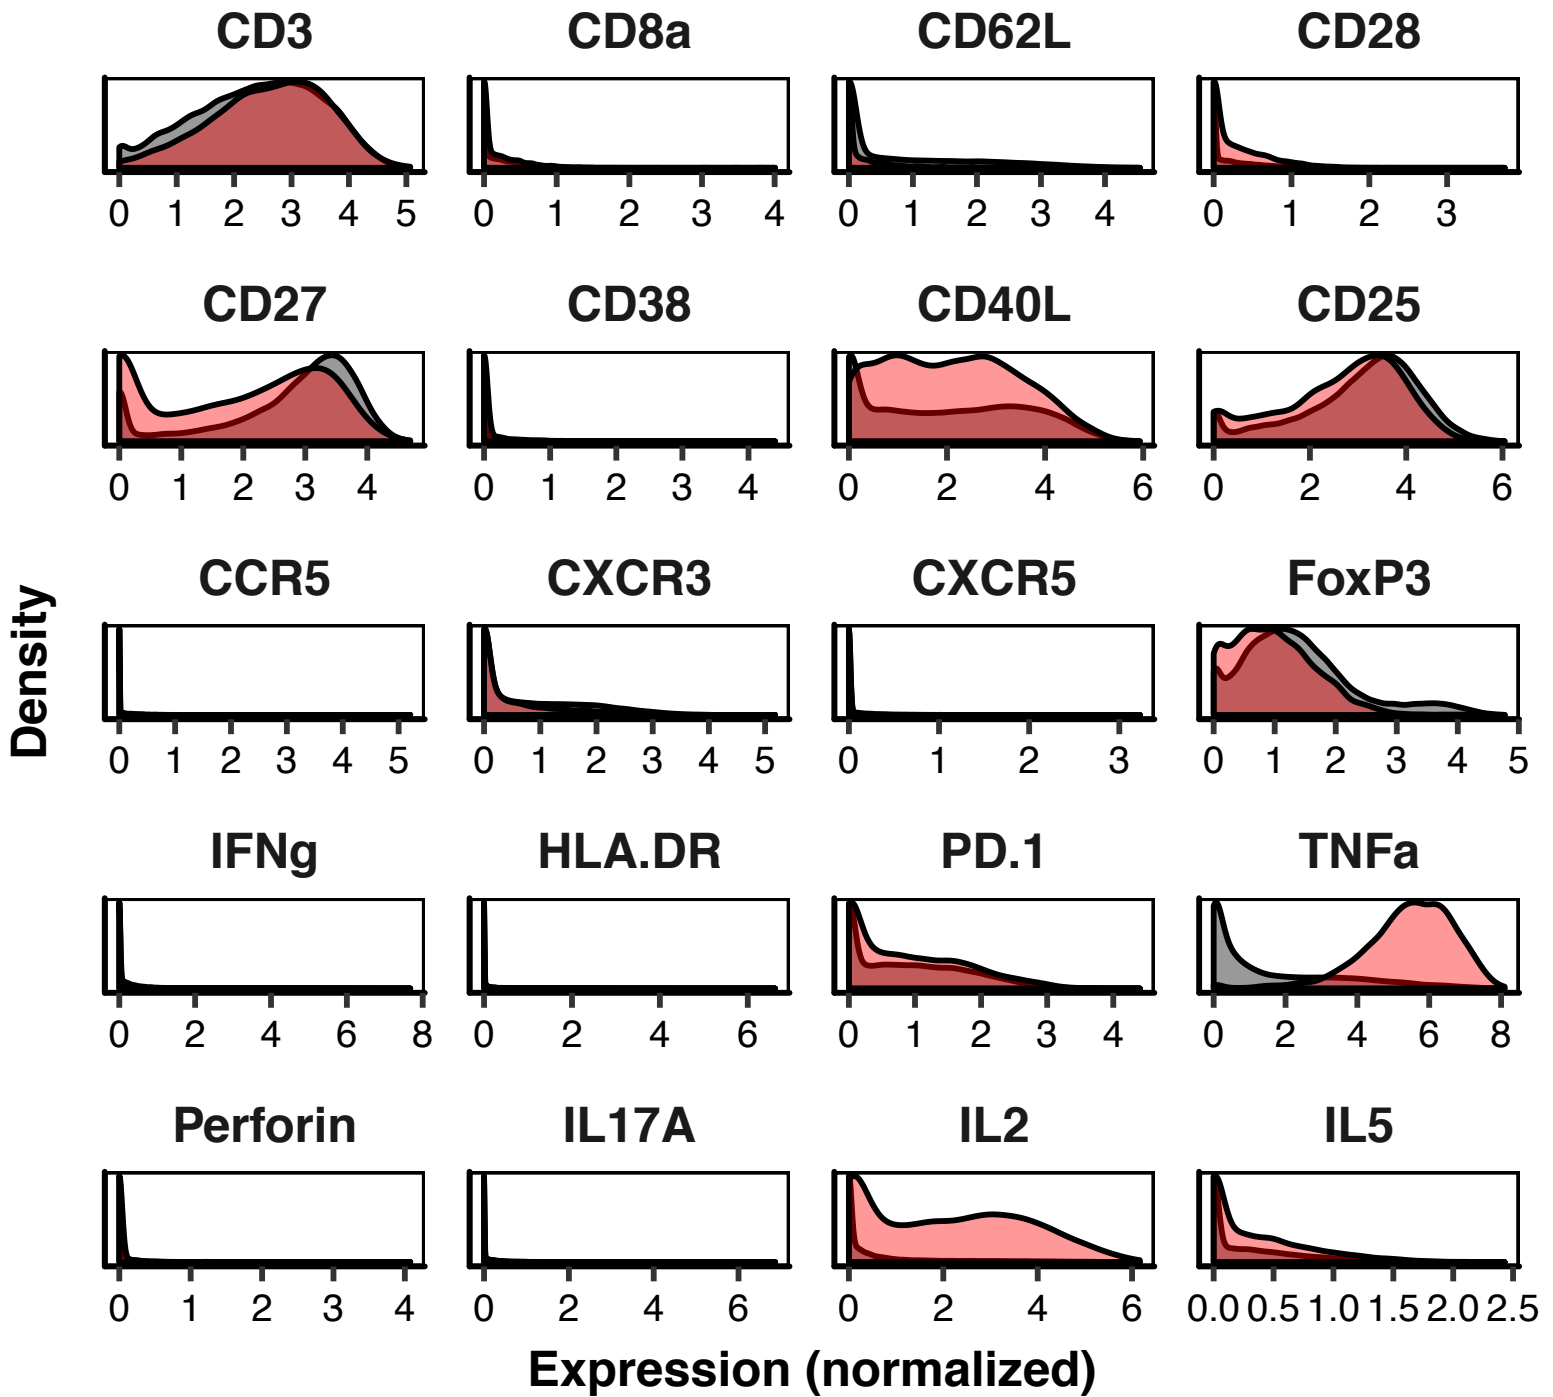

# Cluster 4 – Stimulated

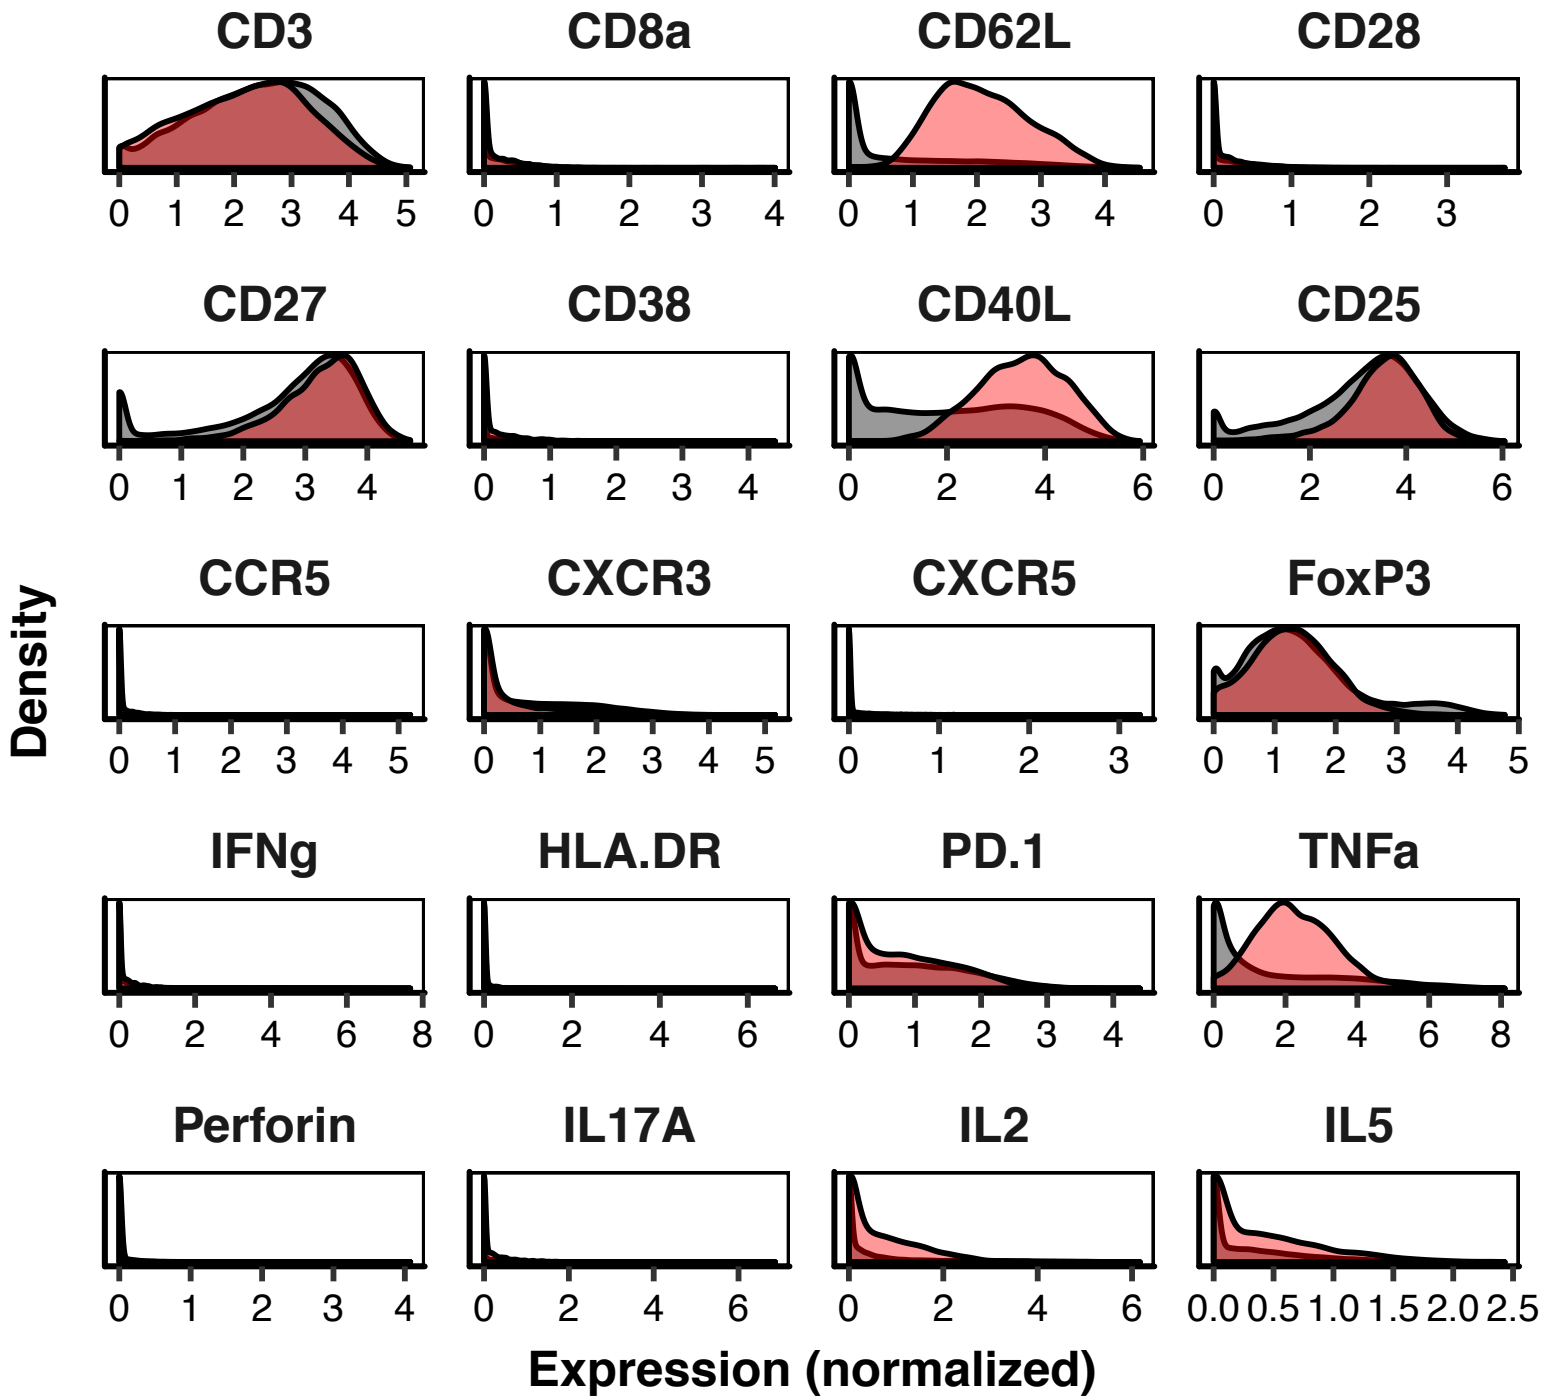

# Cluster 5 – Stimulated

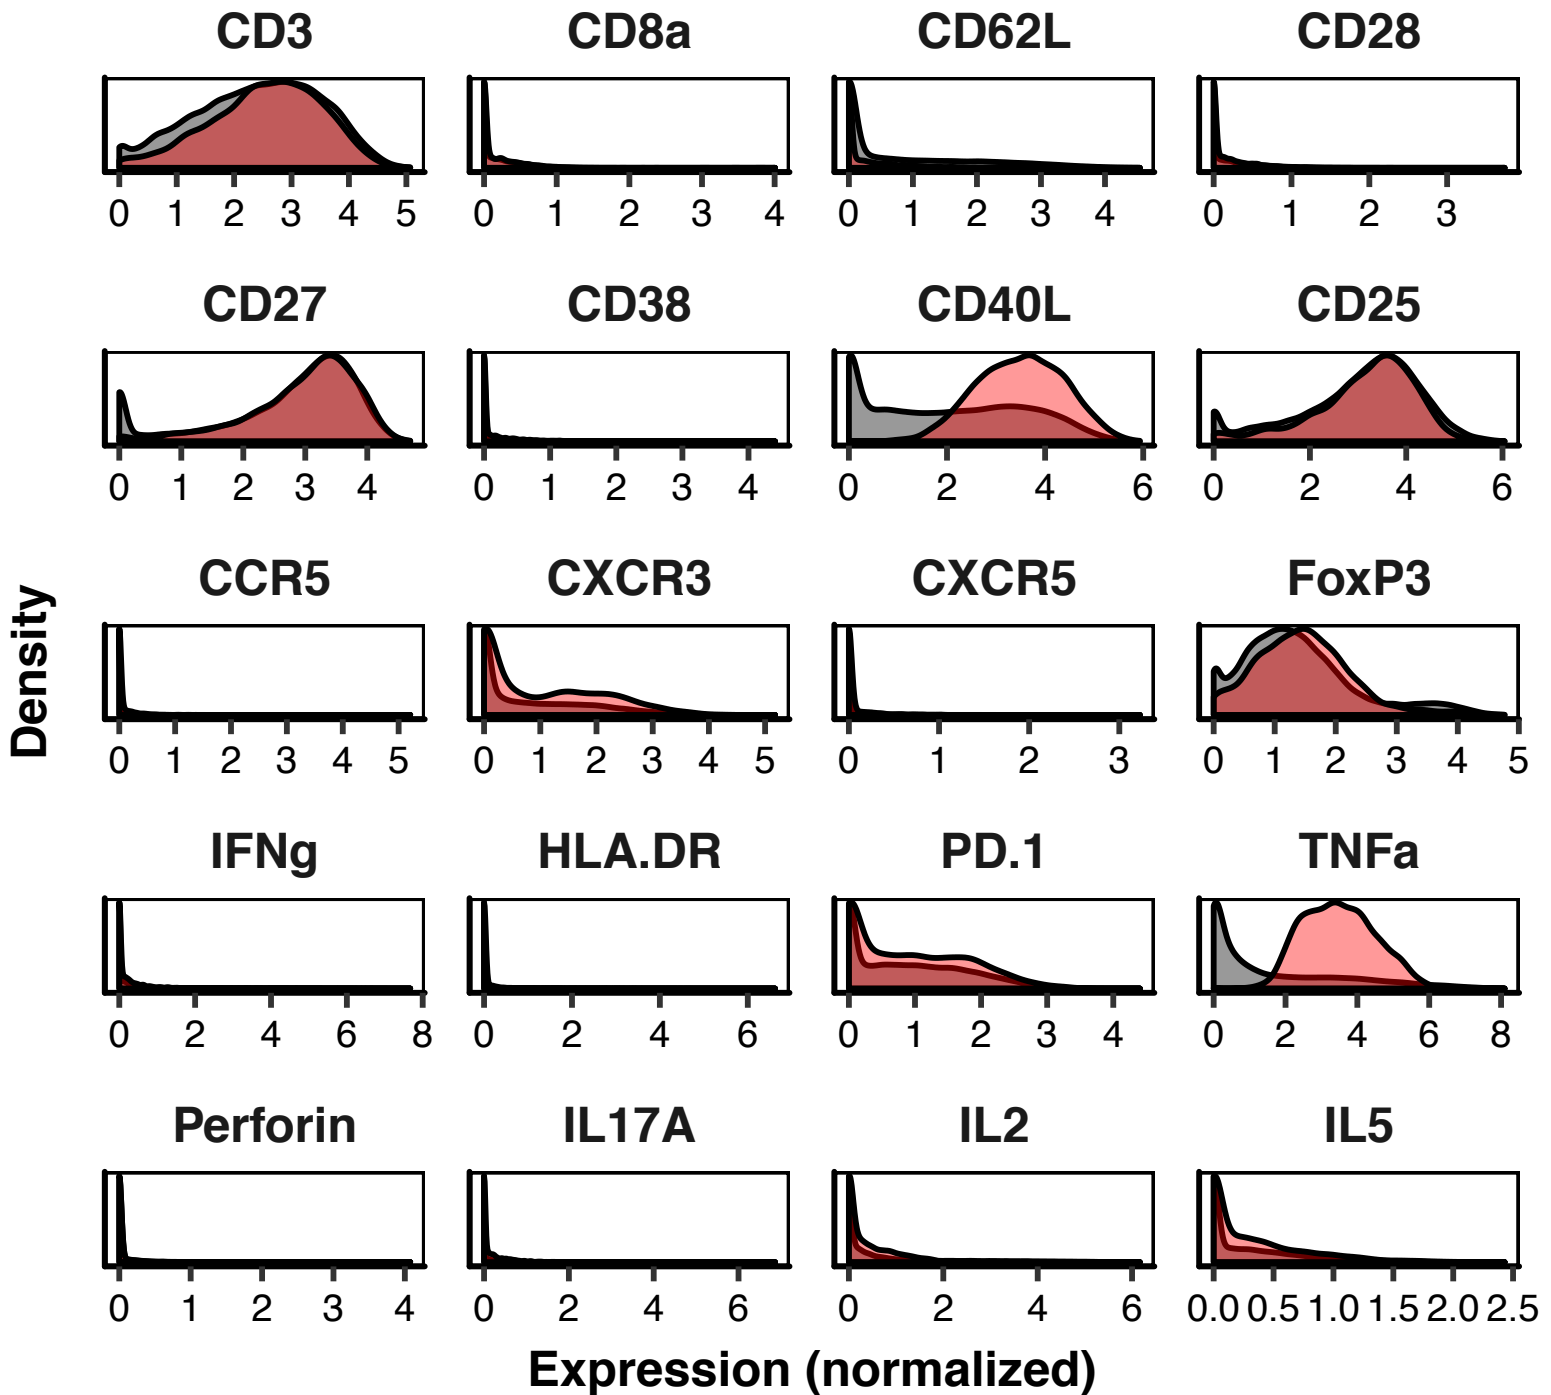



# Cluster 6 – Stimulated

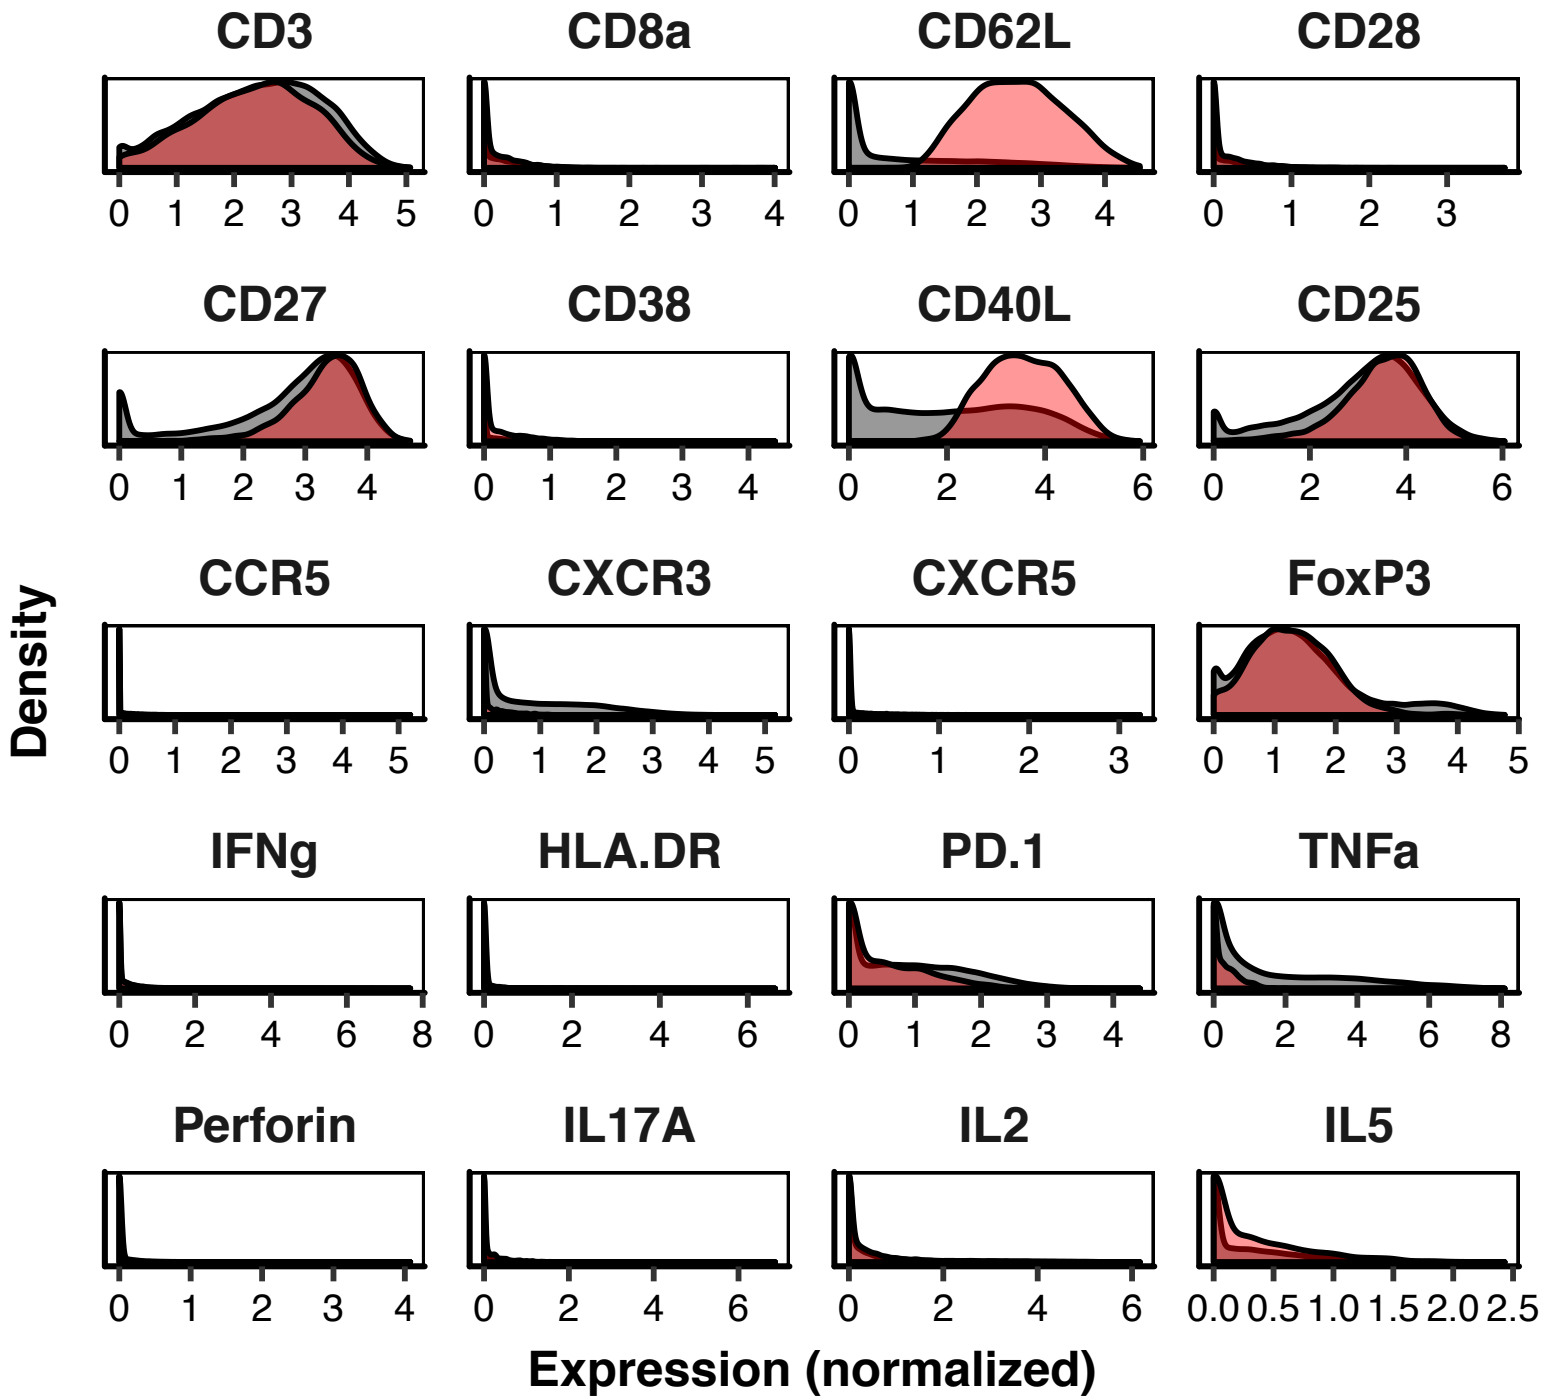

# Cluster 7 – Stimulated

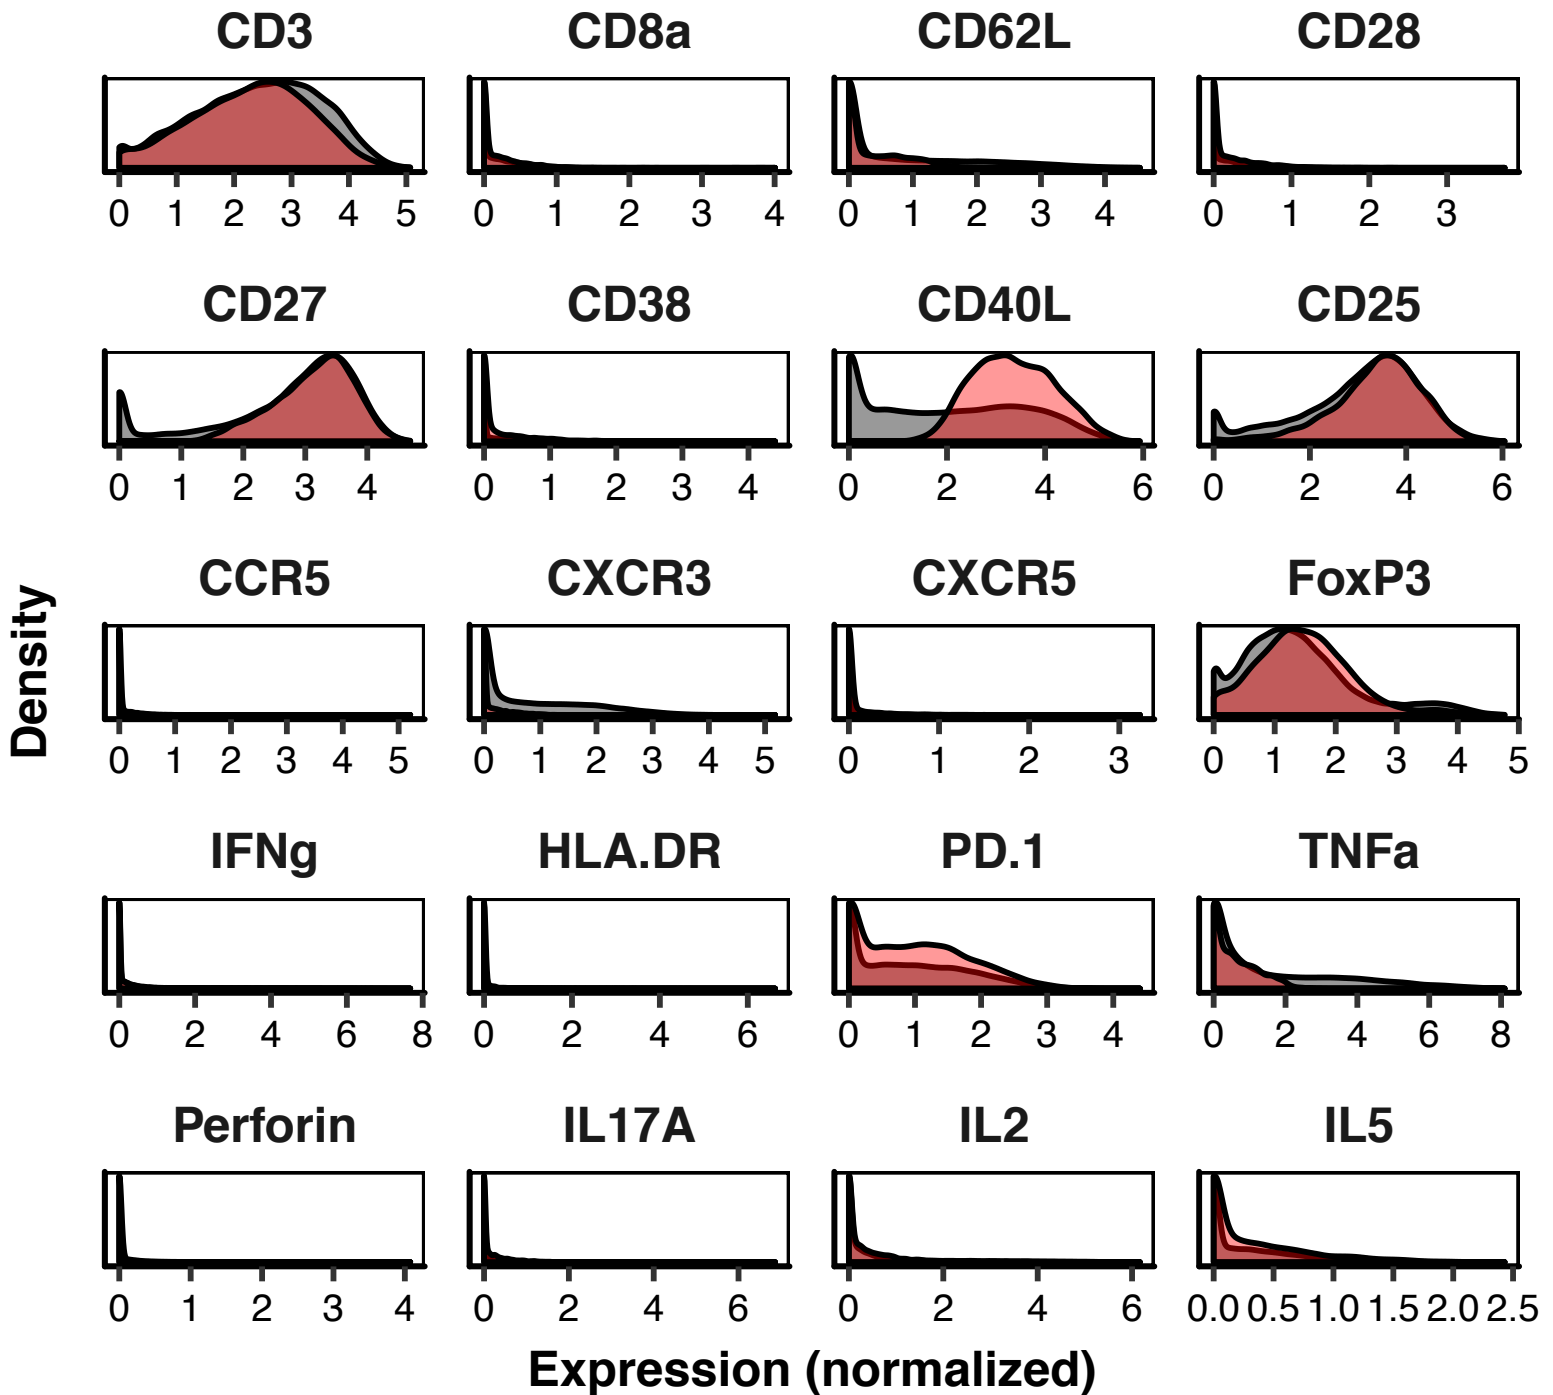

# Cluster 8 – Stimulated

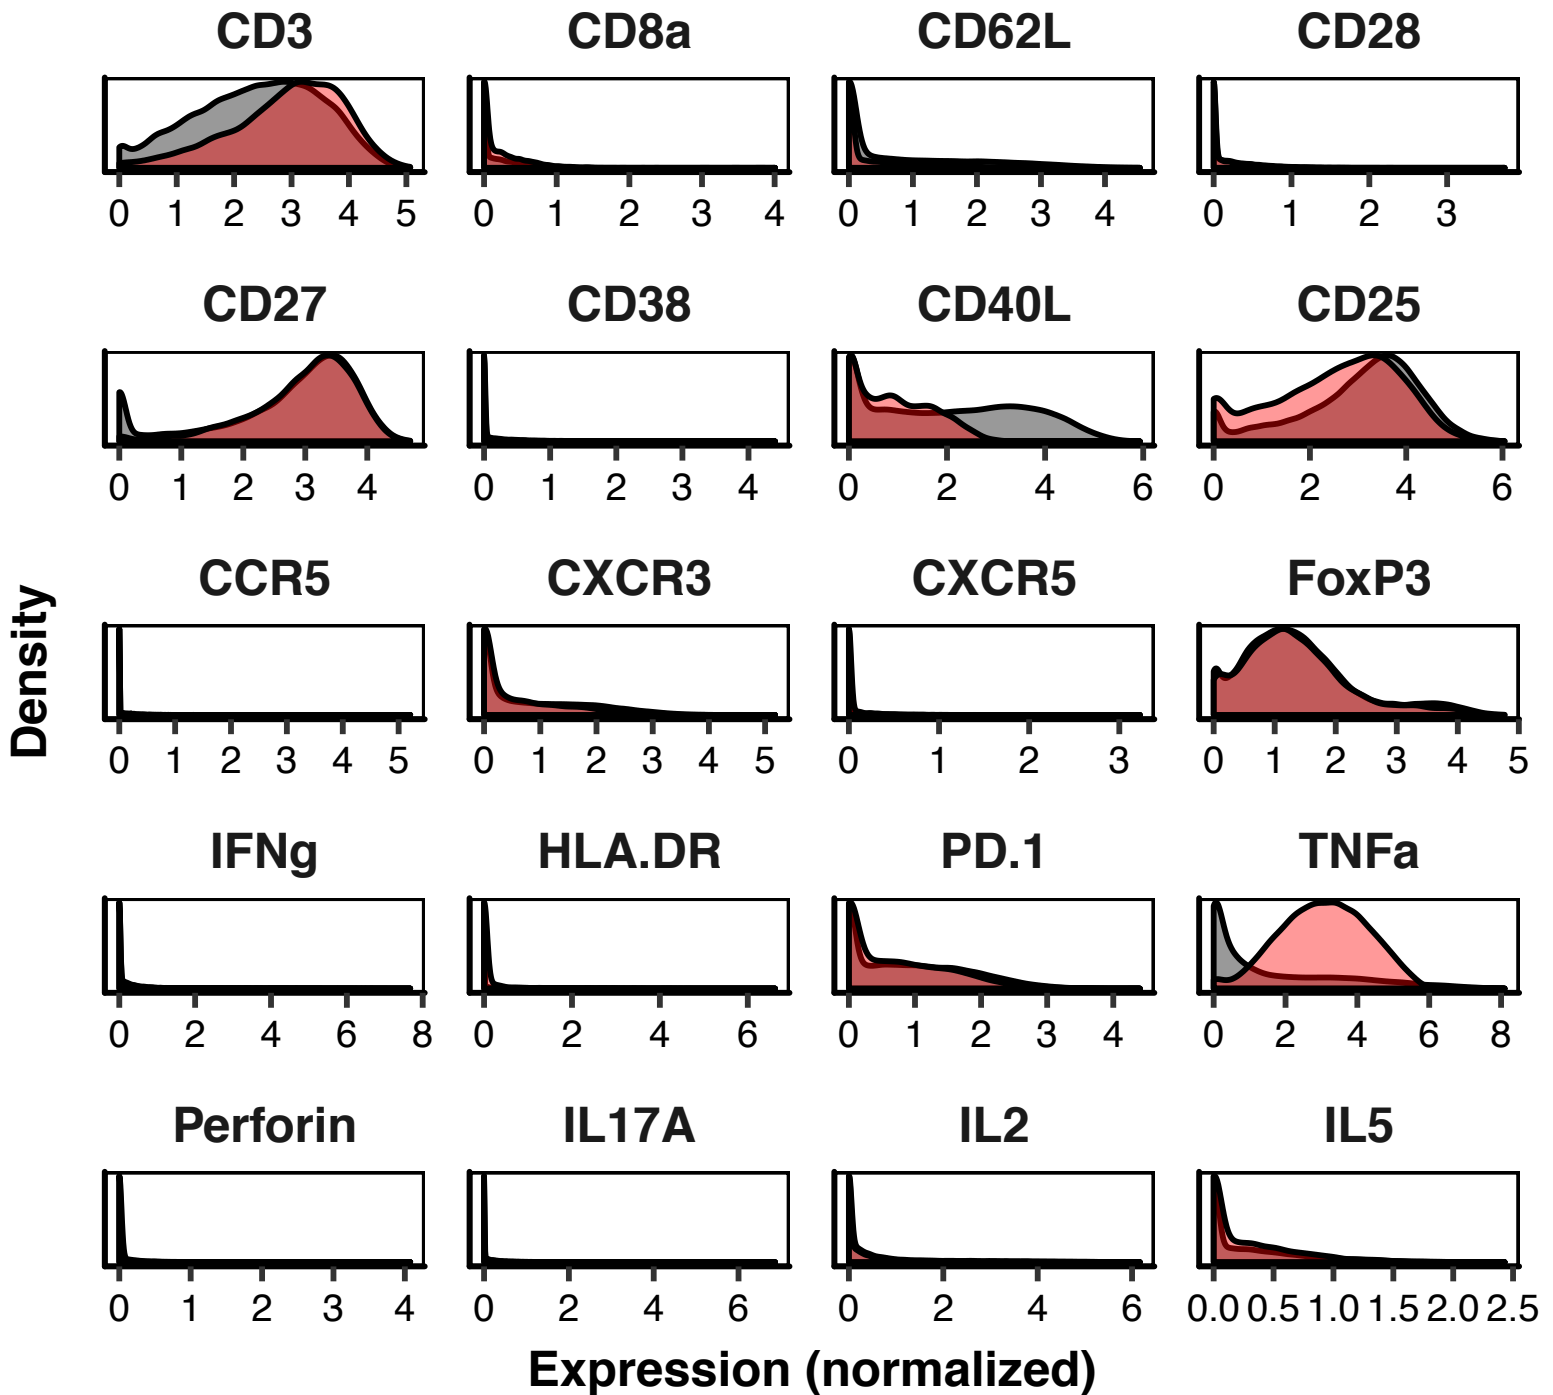

# Cluster 9 – Stimulated

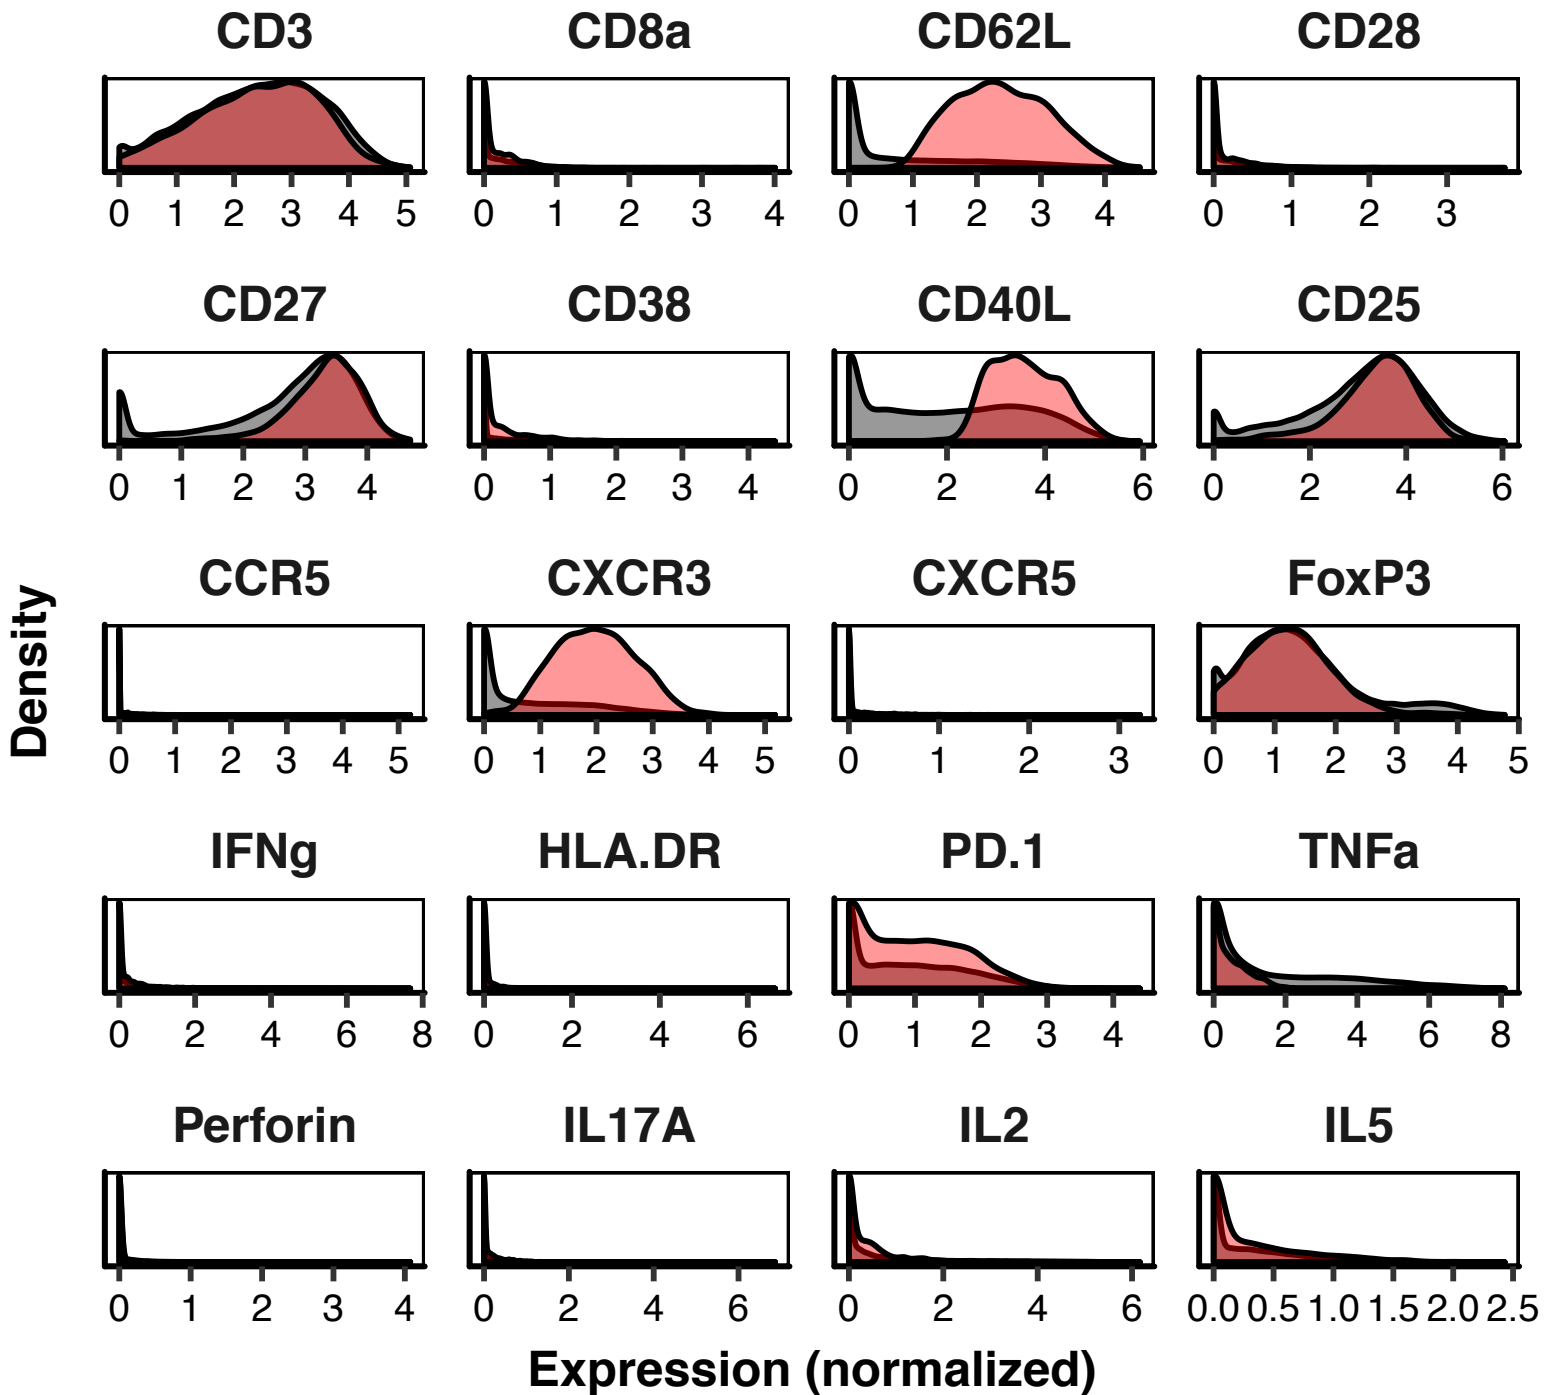

# Cluster 10 – Stimulated

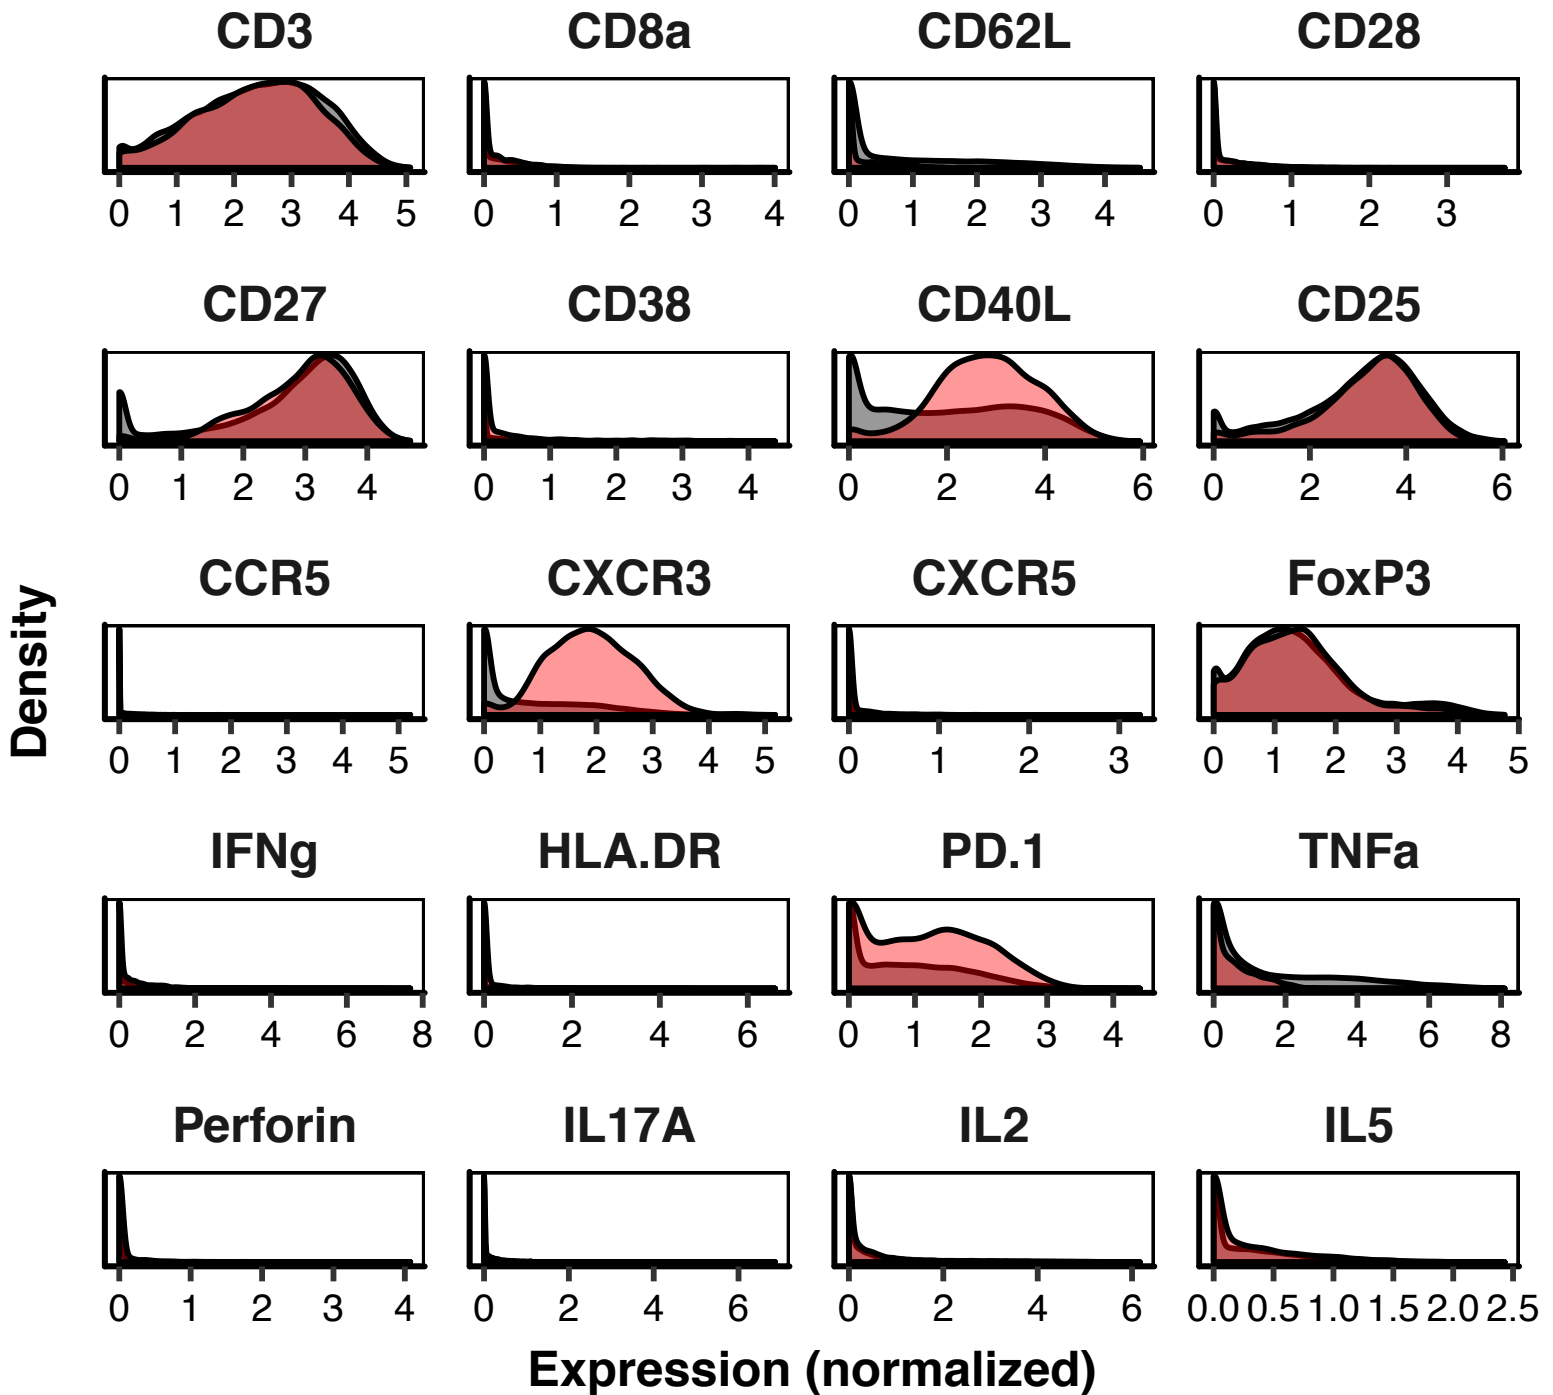

# Cluster 11 – Stimulated

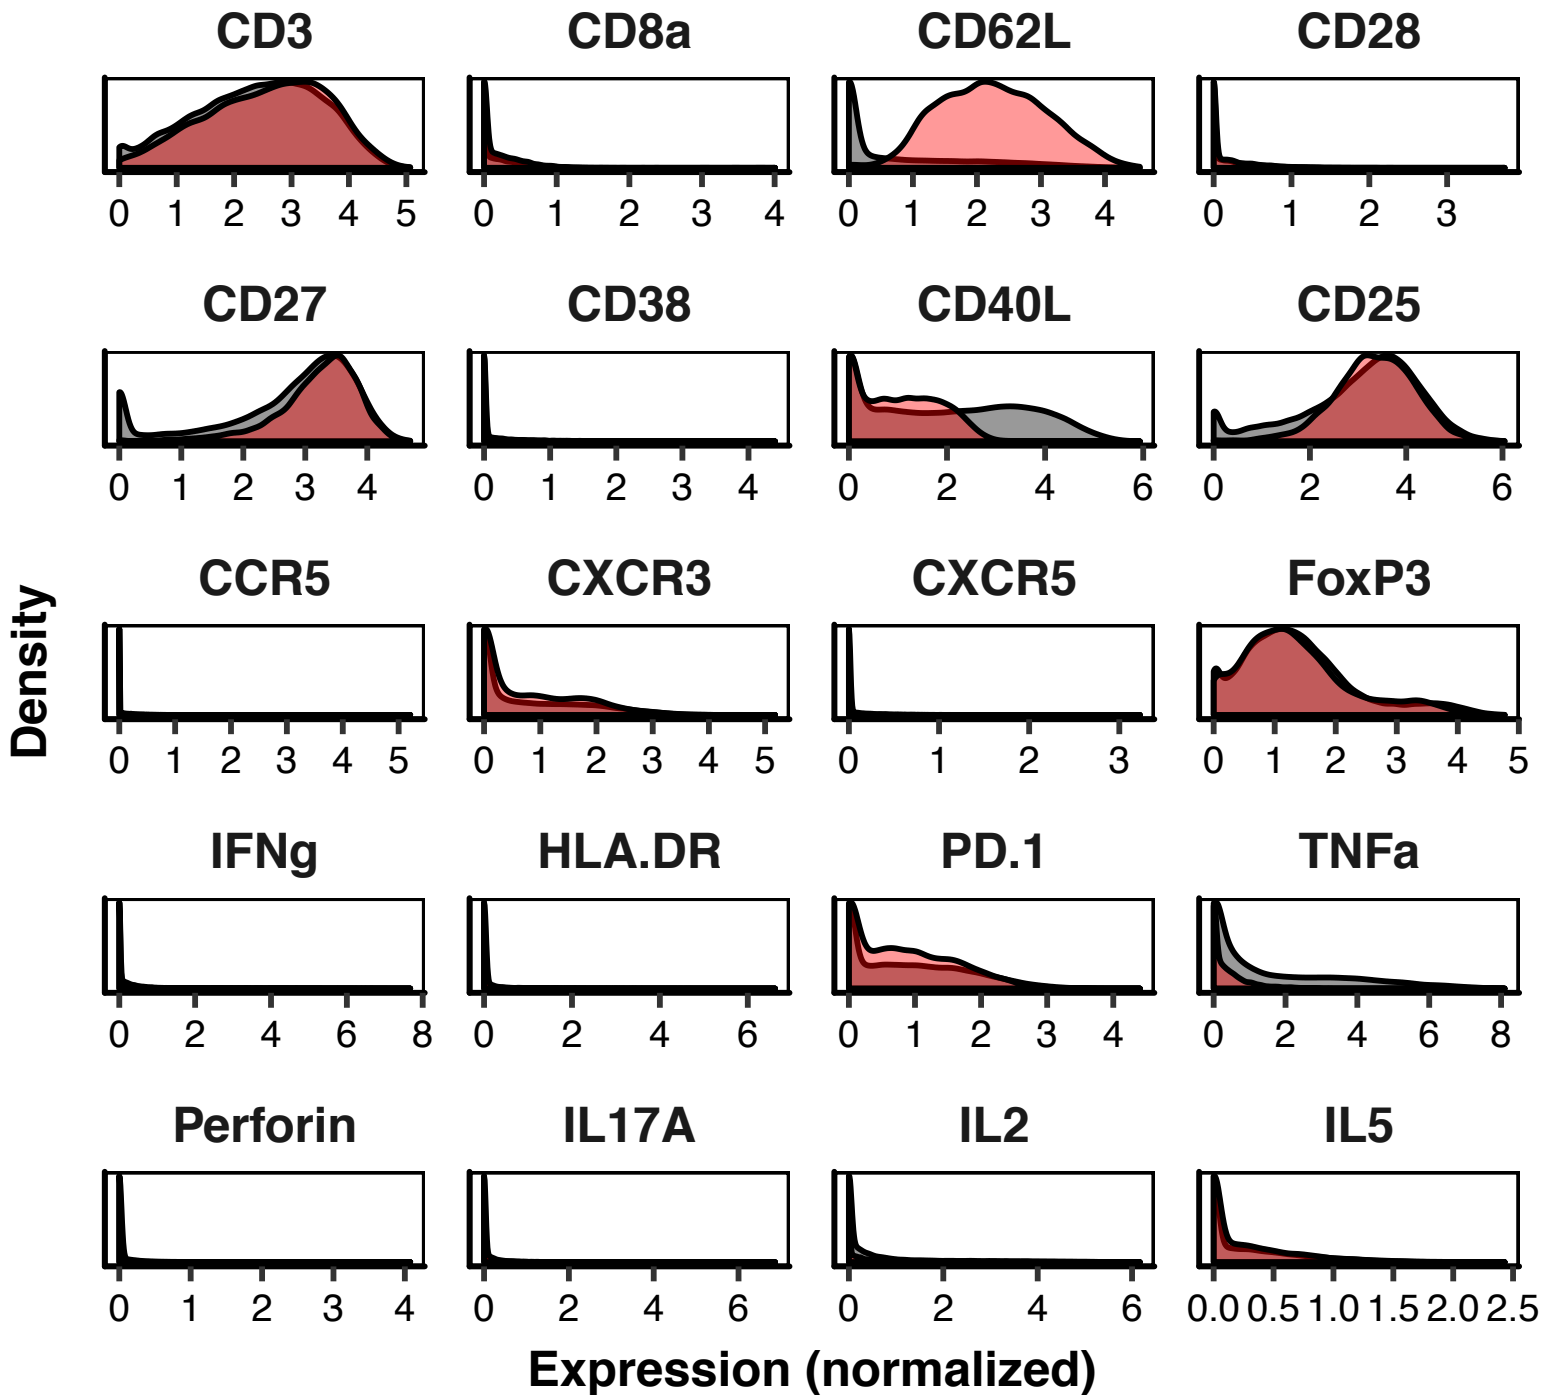

# Cluster 12 – Stimulated

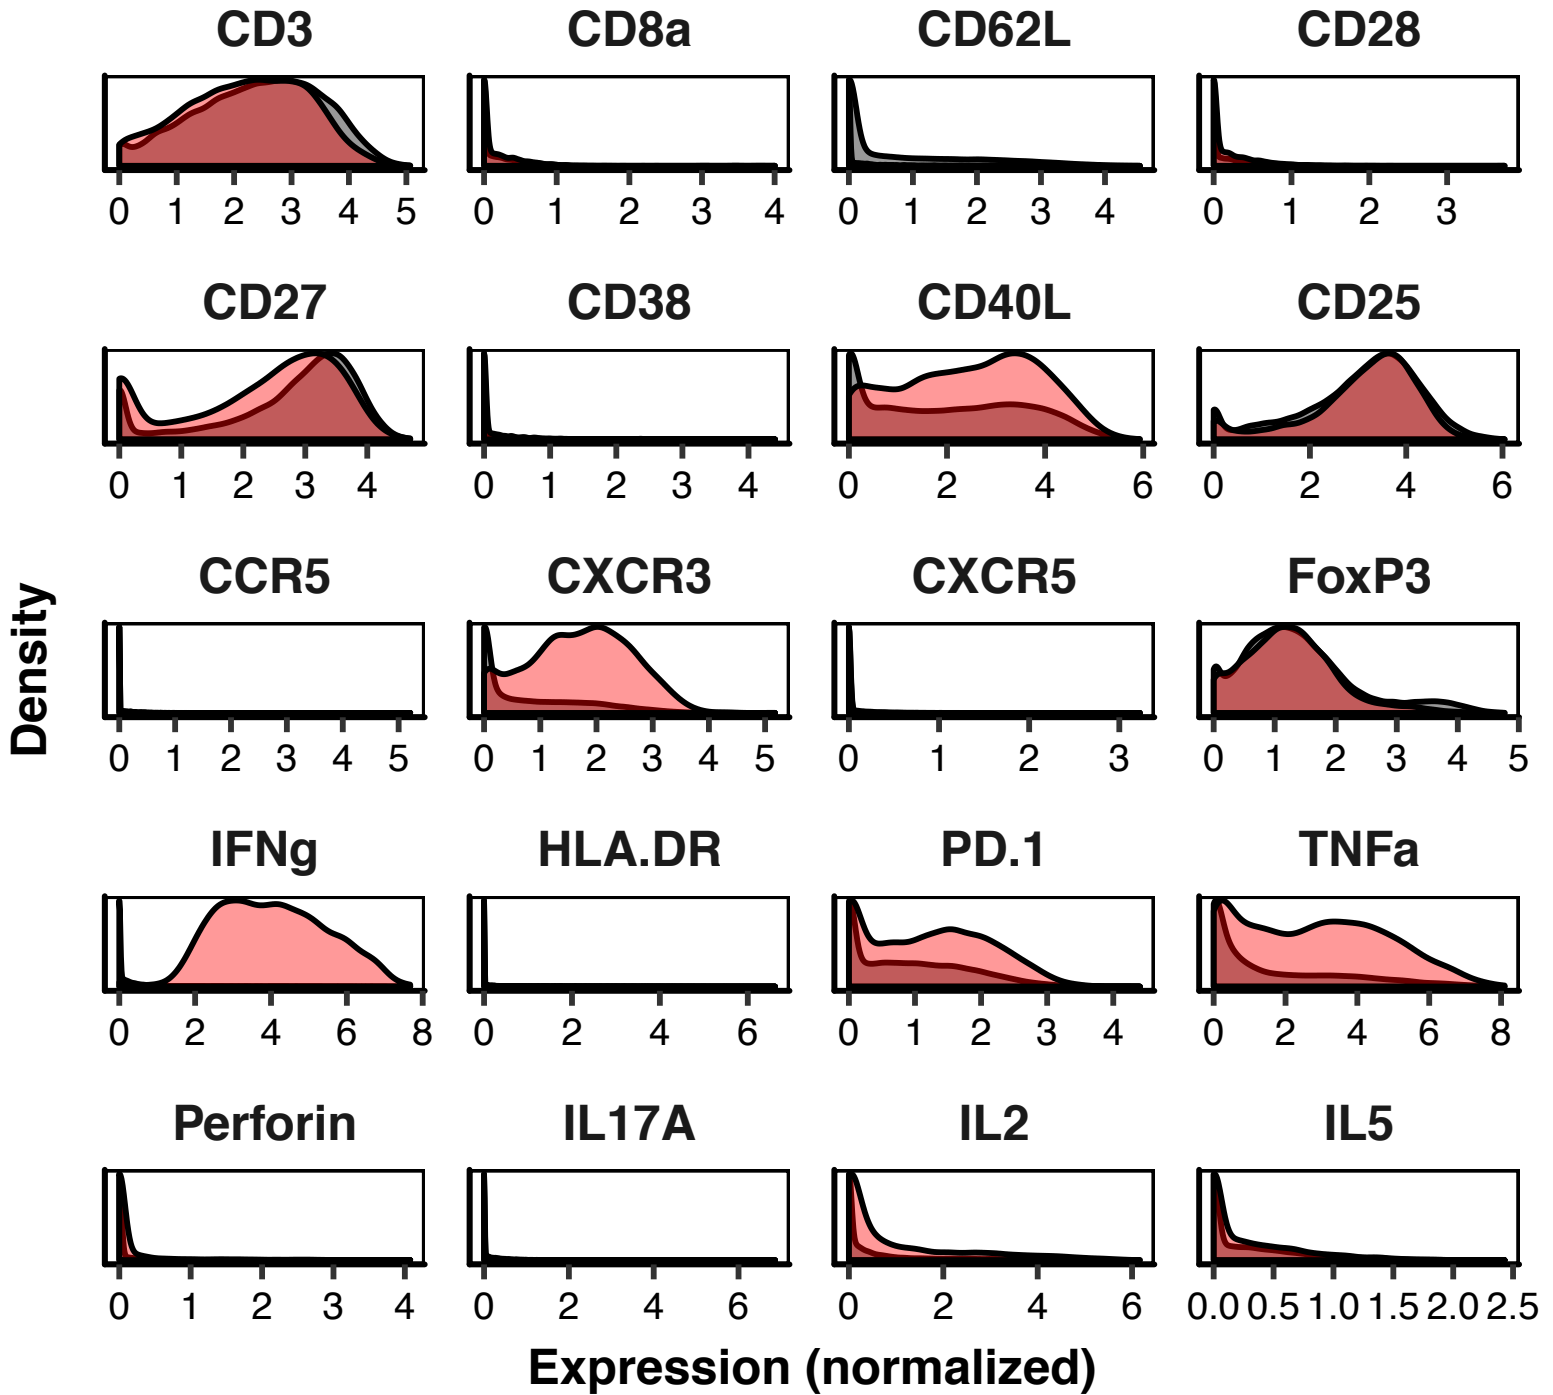

# Cluster 13 – Stimulated

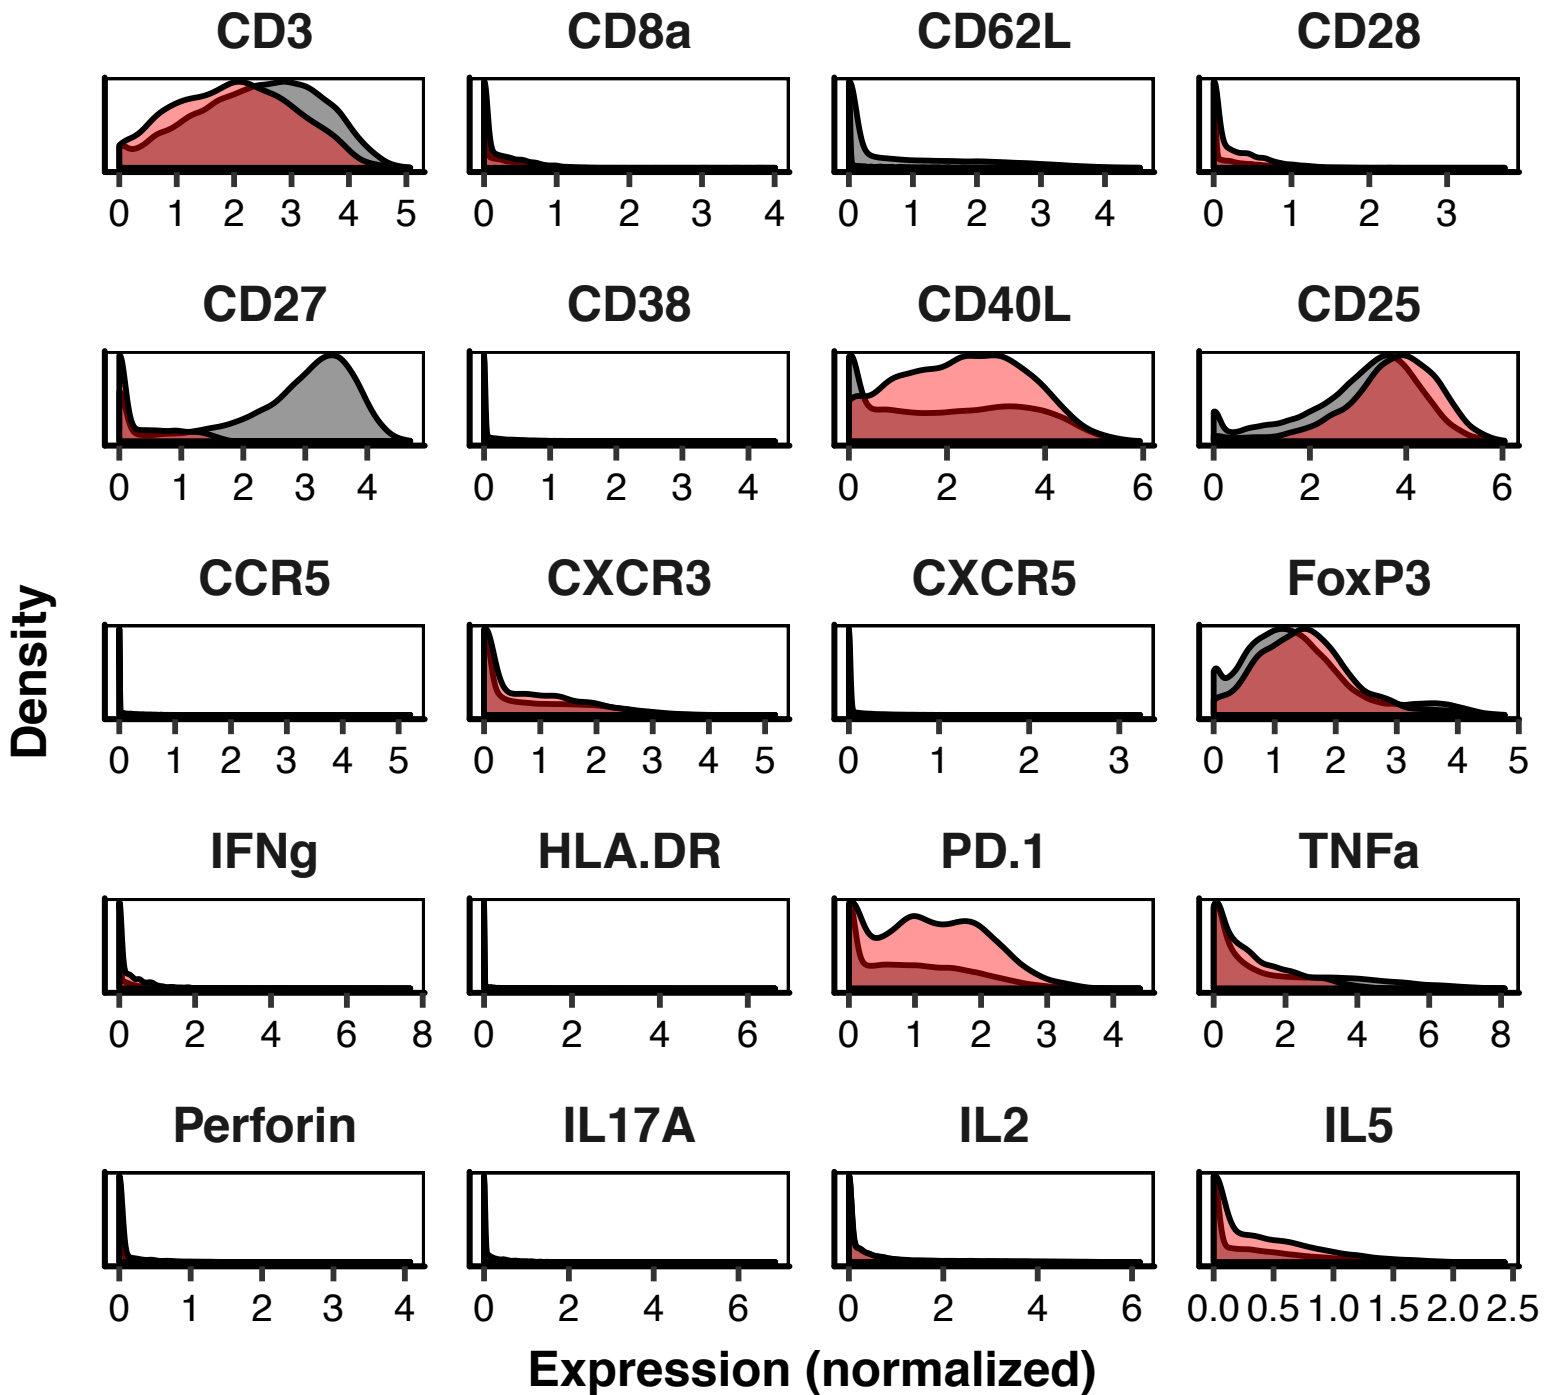



# Cluster 14 – Stimulated

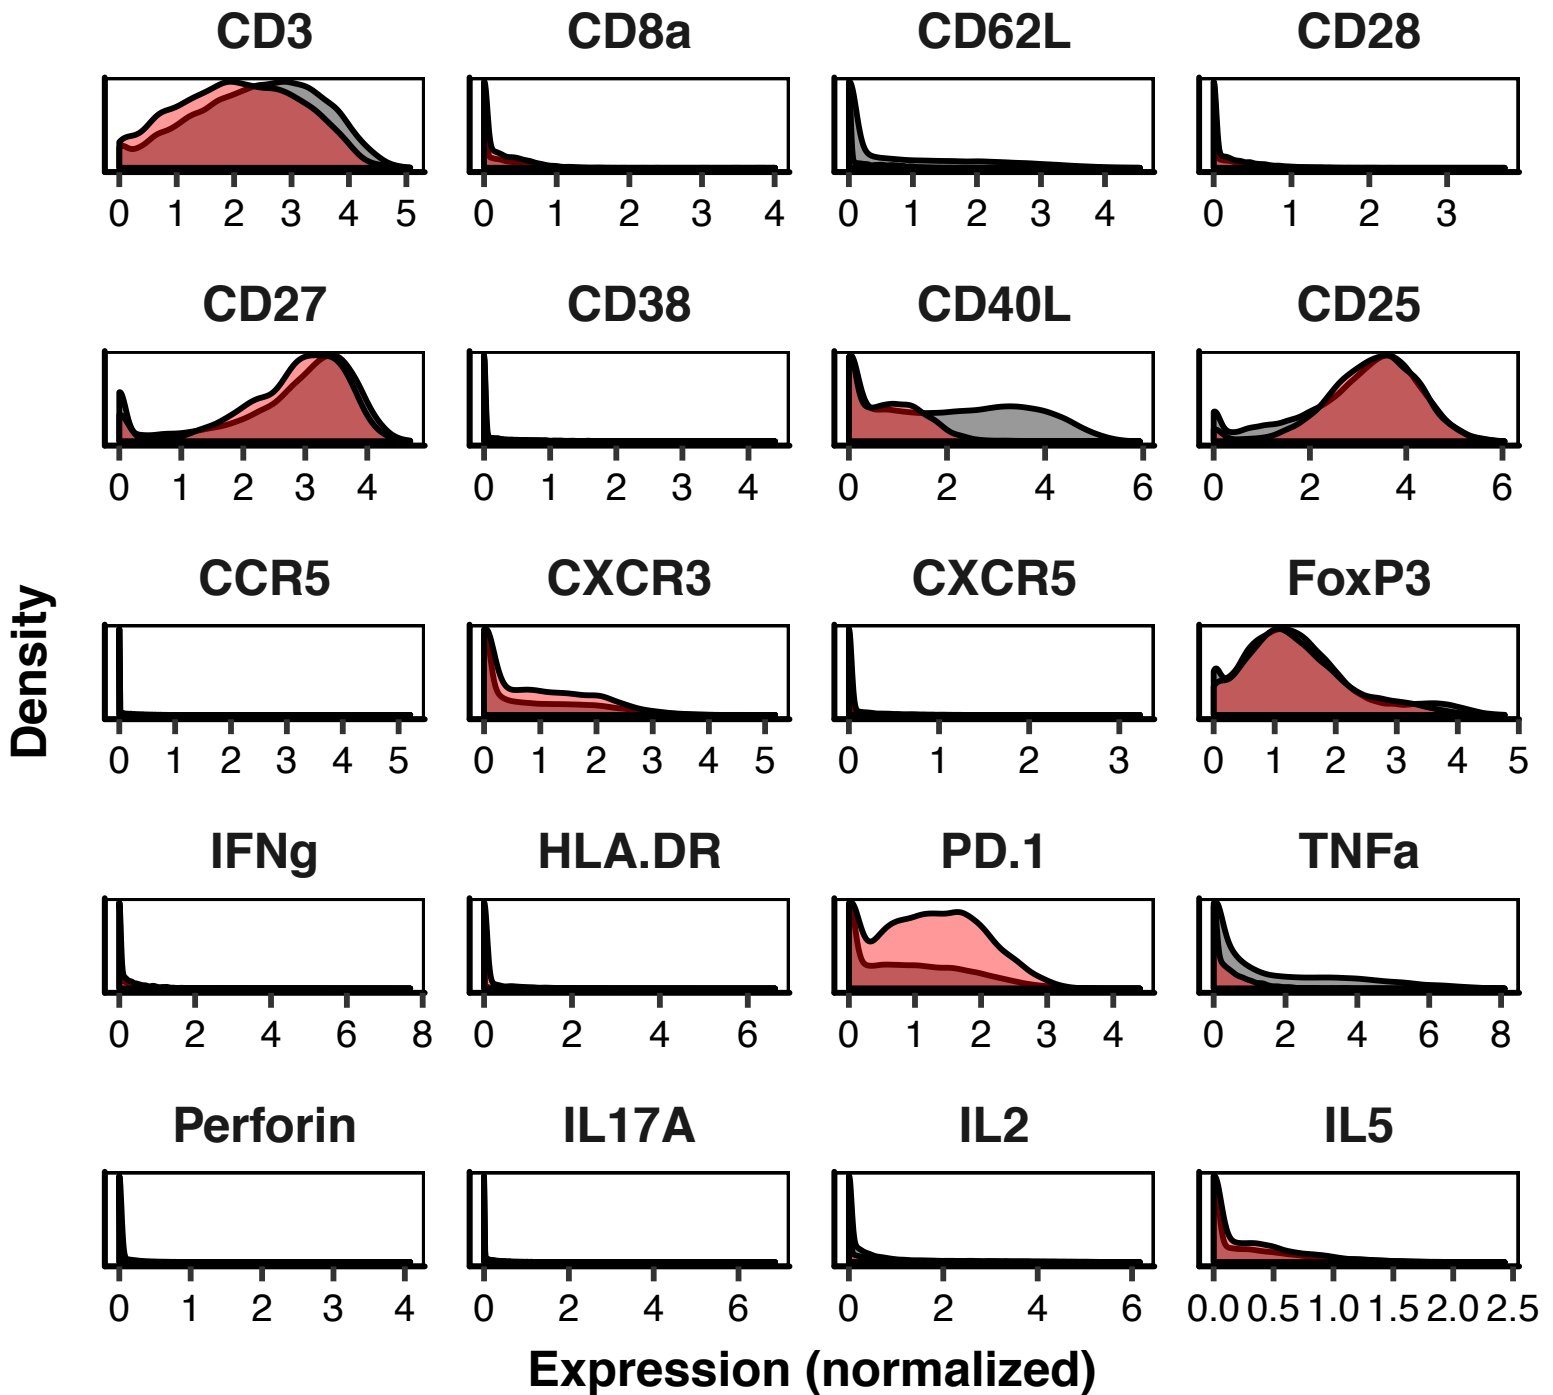

# Cluster 15 – Stimulated

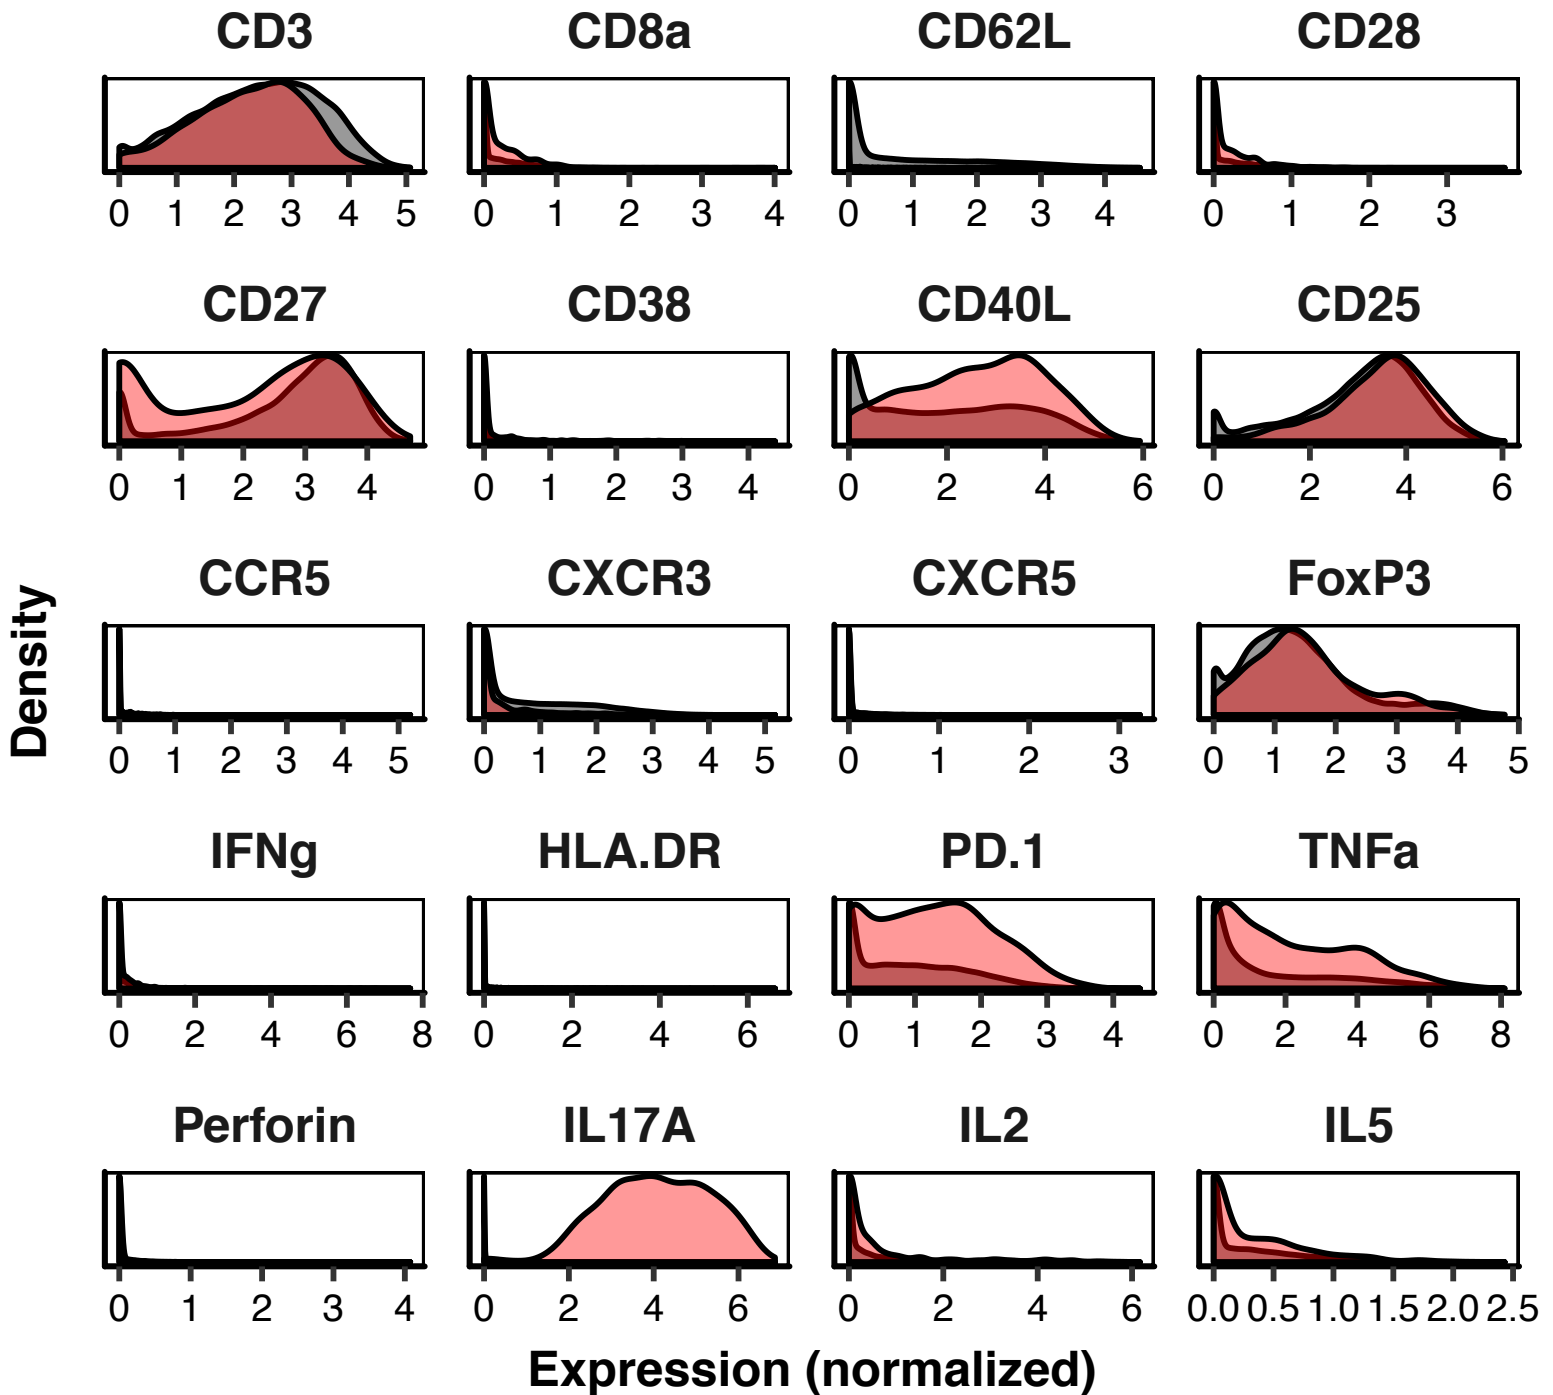

# Cluster 16 – Stimulated

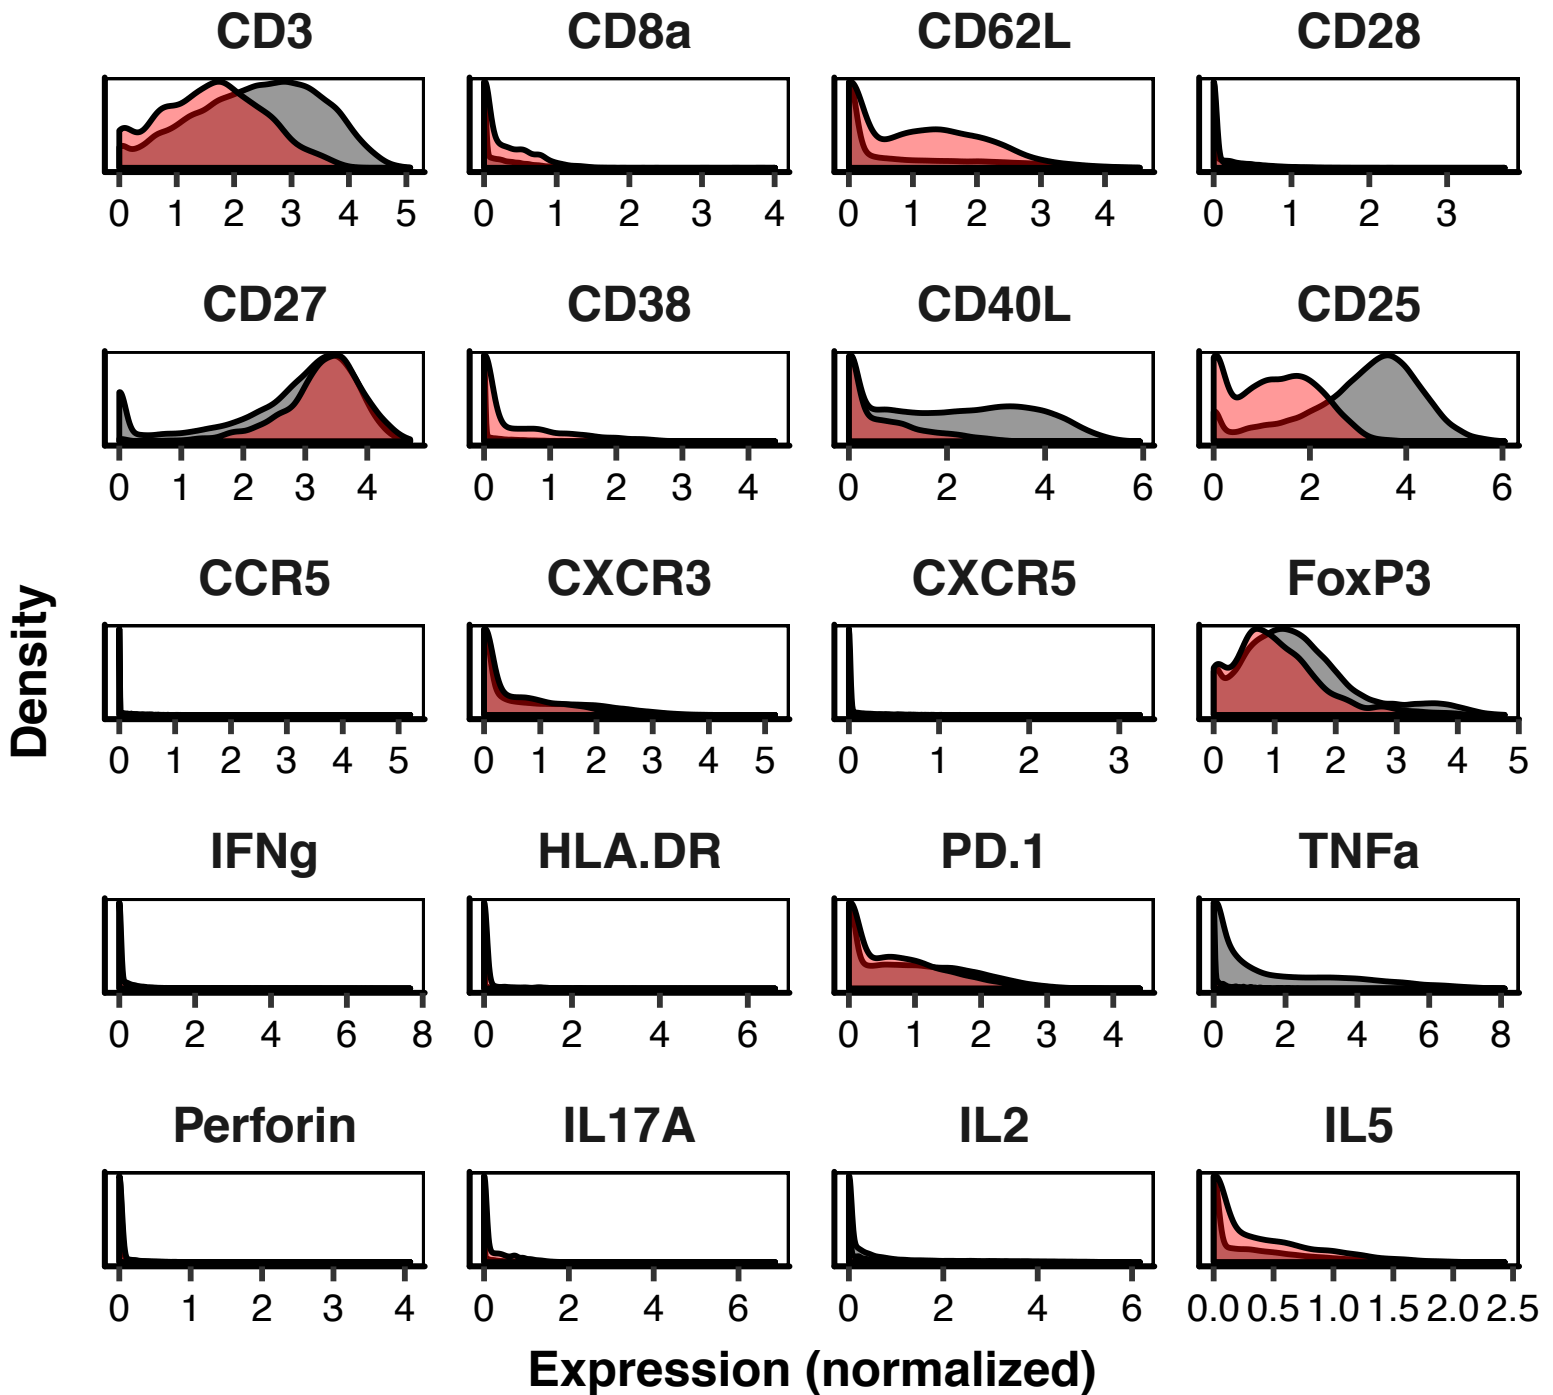

# Cluster 17 – Stimulated

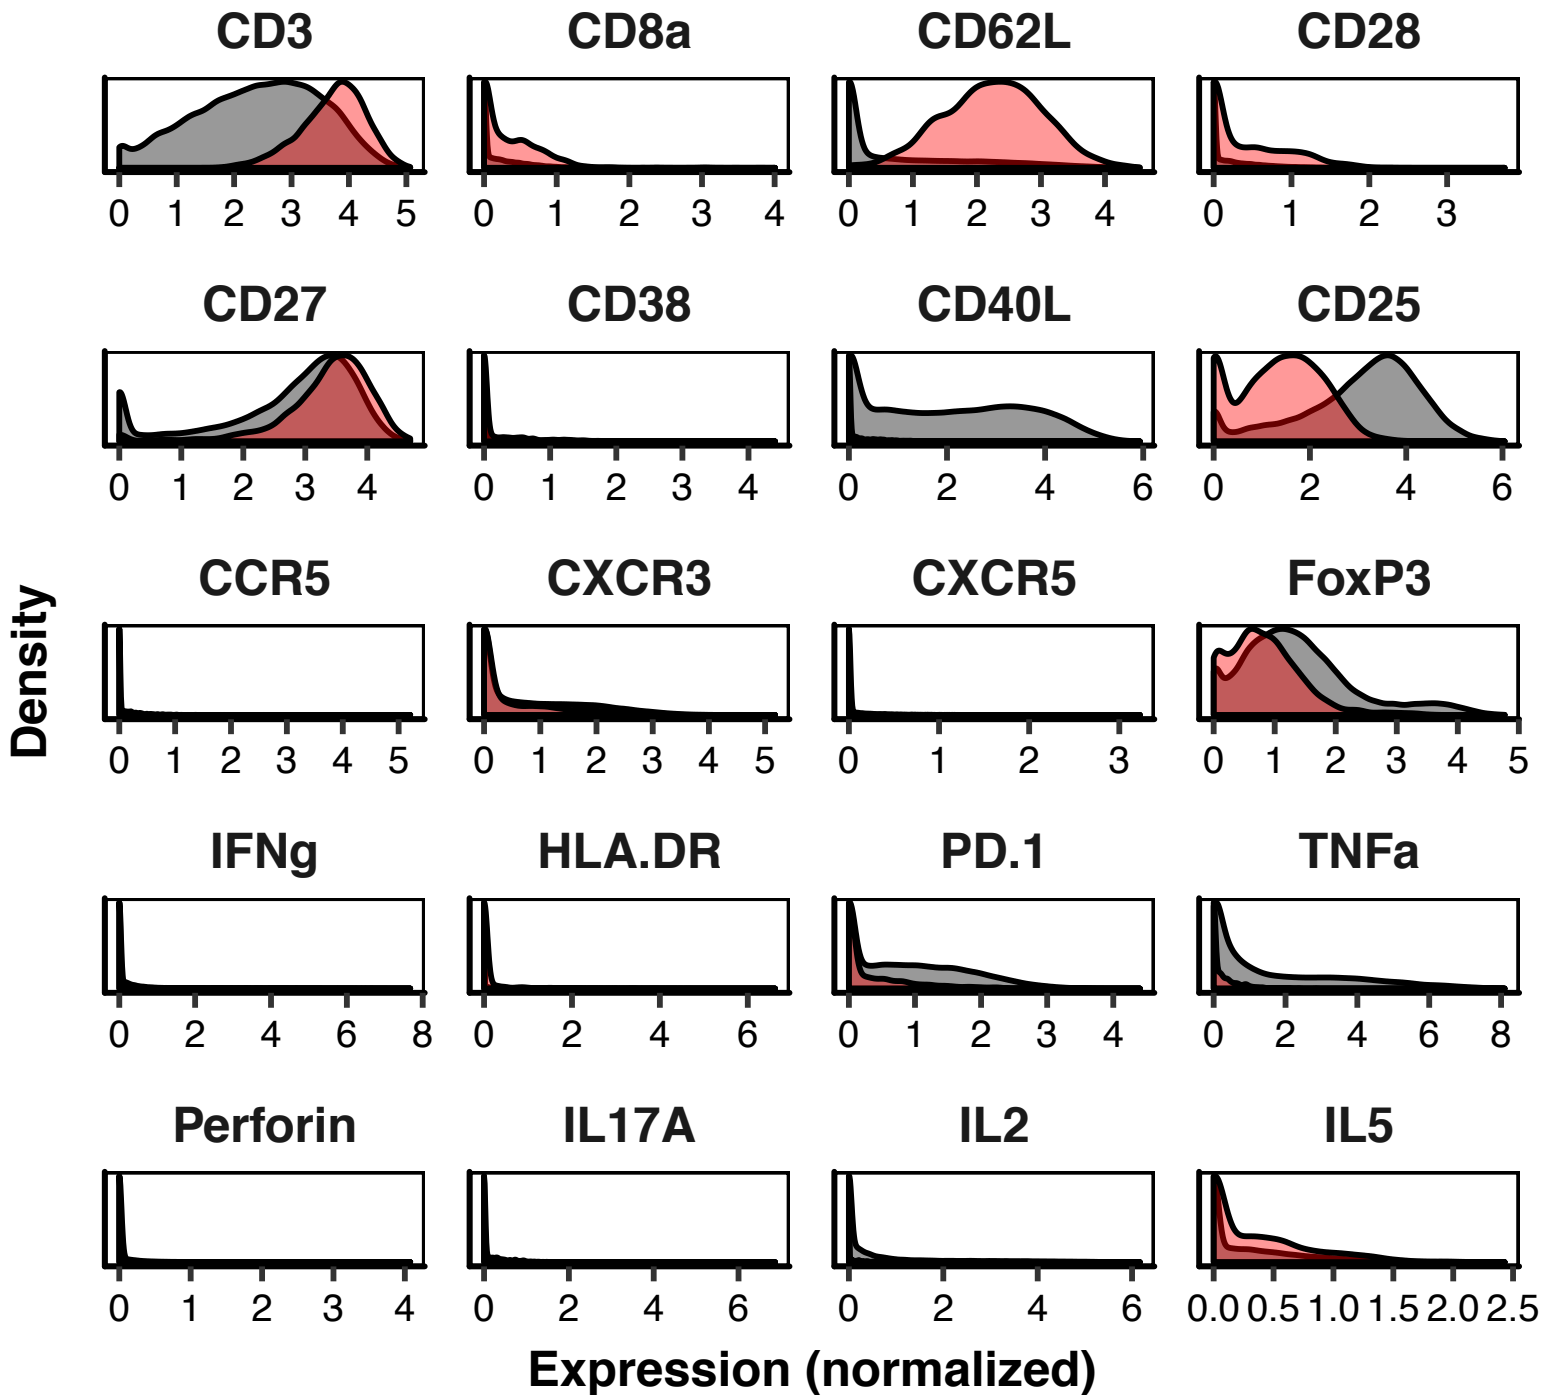

# Cluster 18 – Stimulated

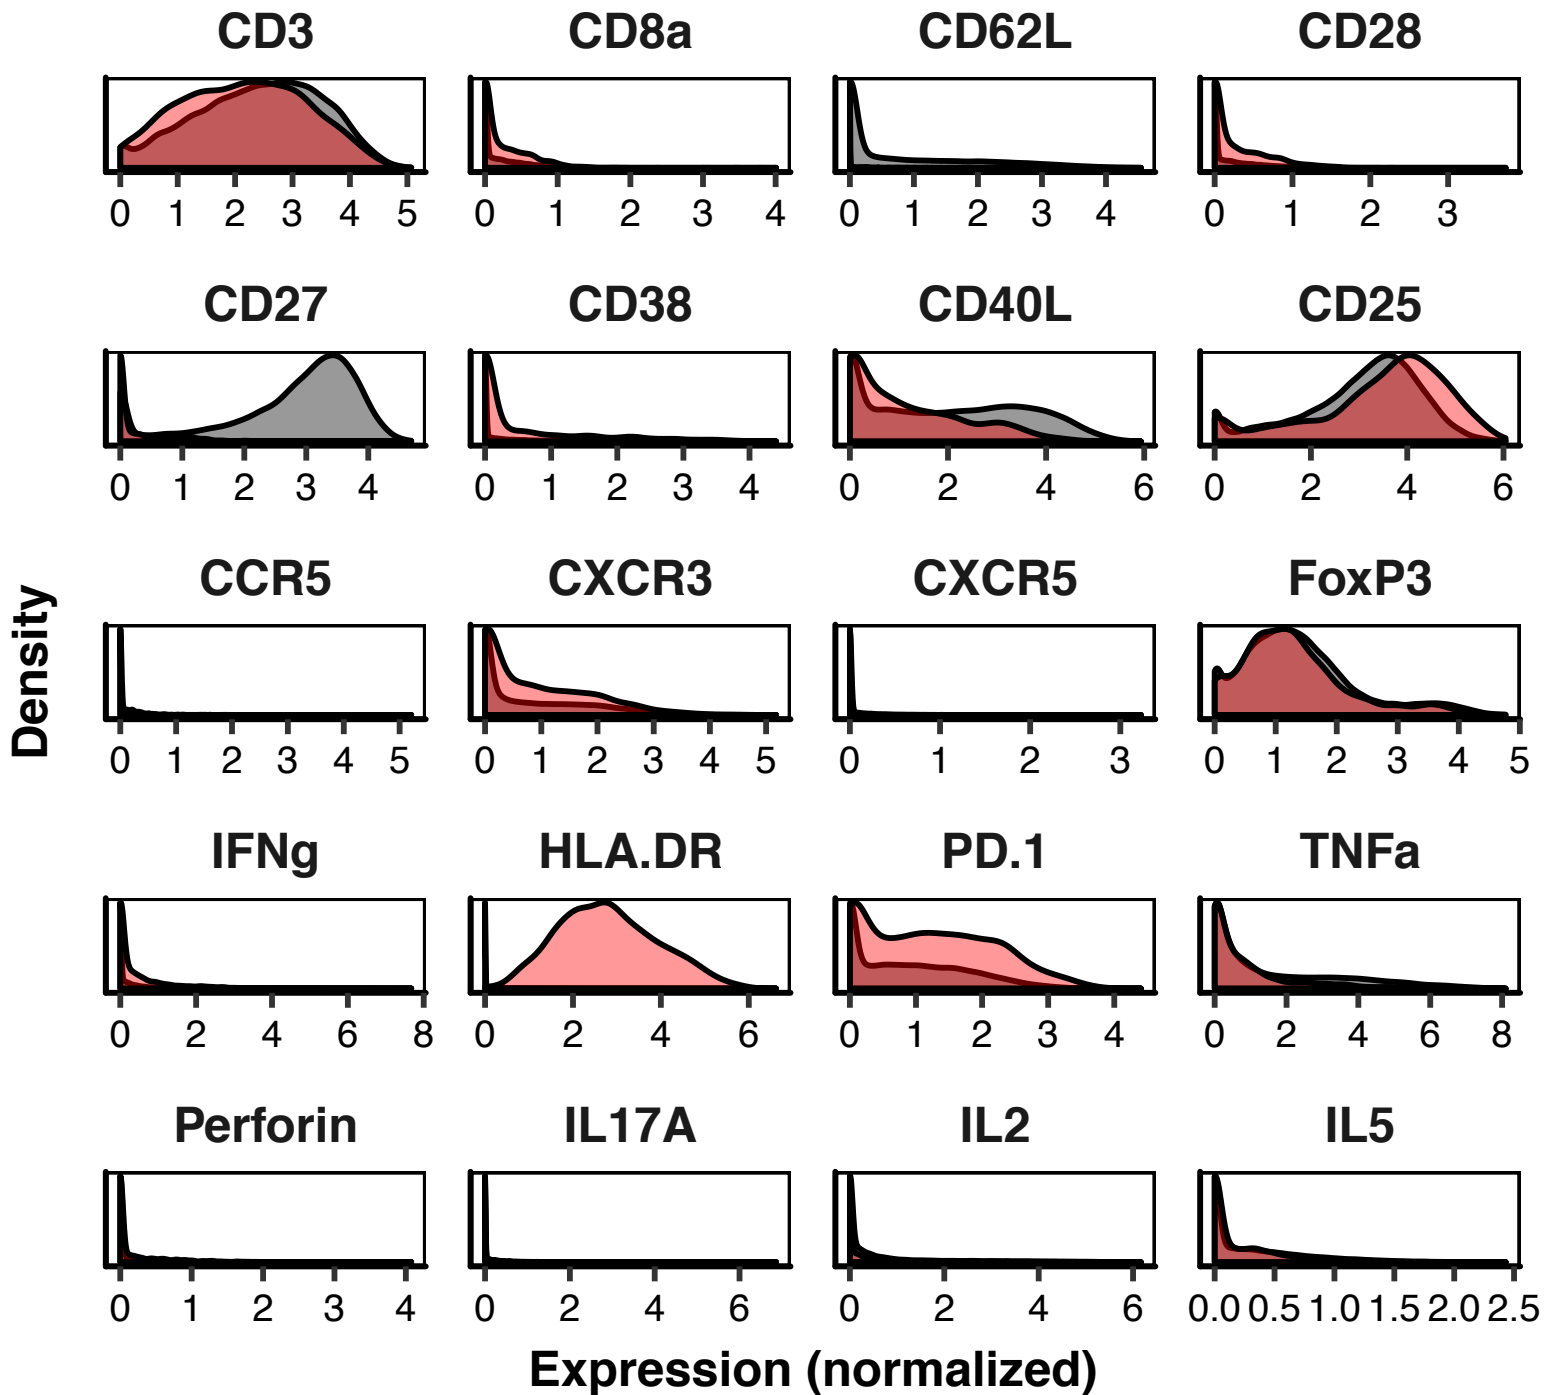

# Cluster 19 – Stimulated

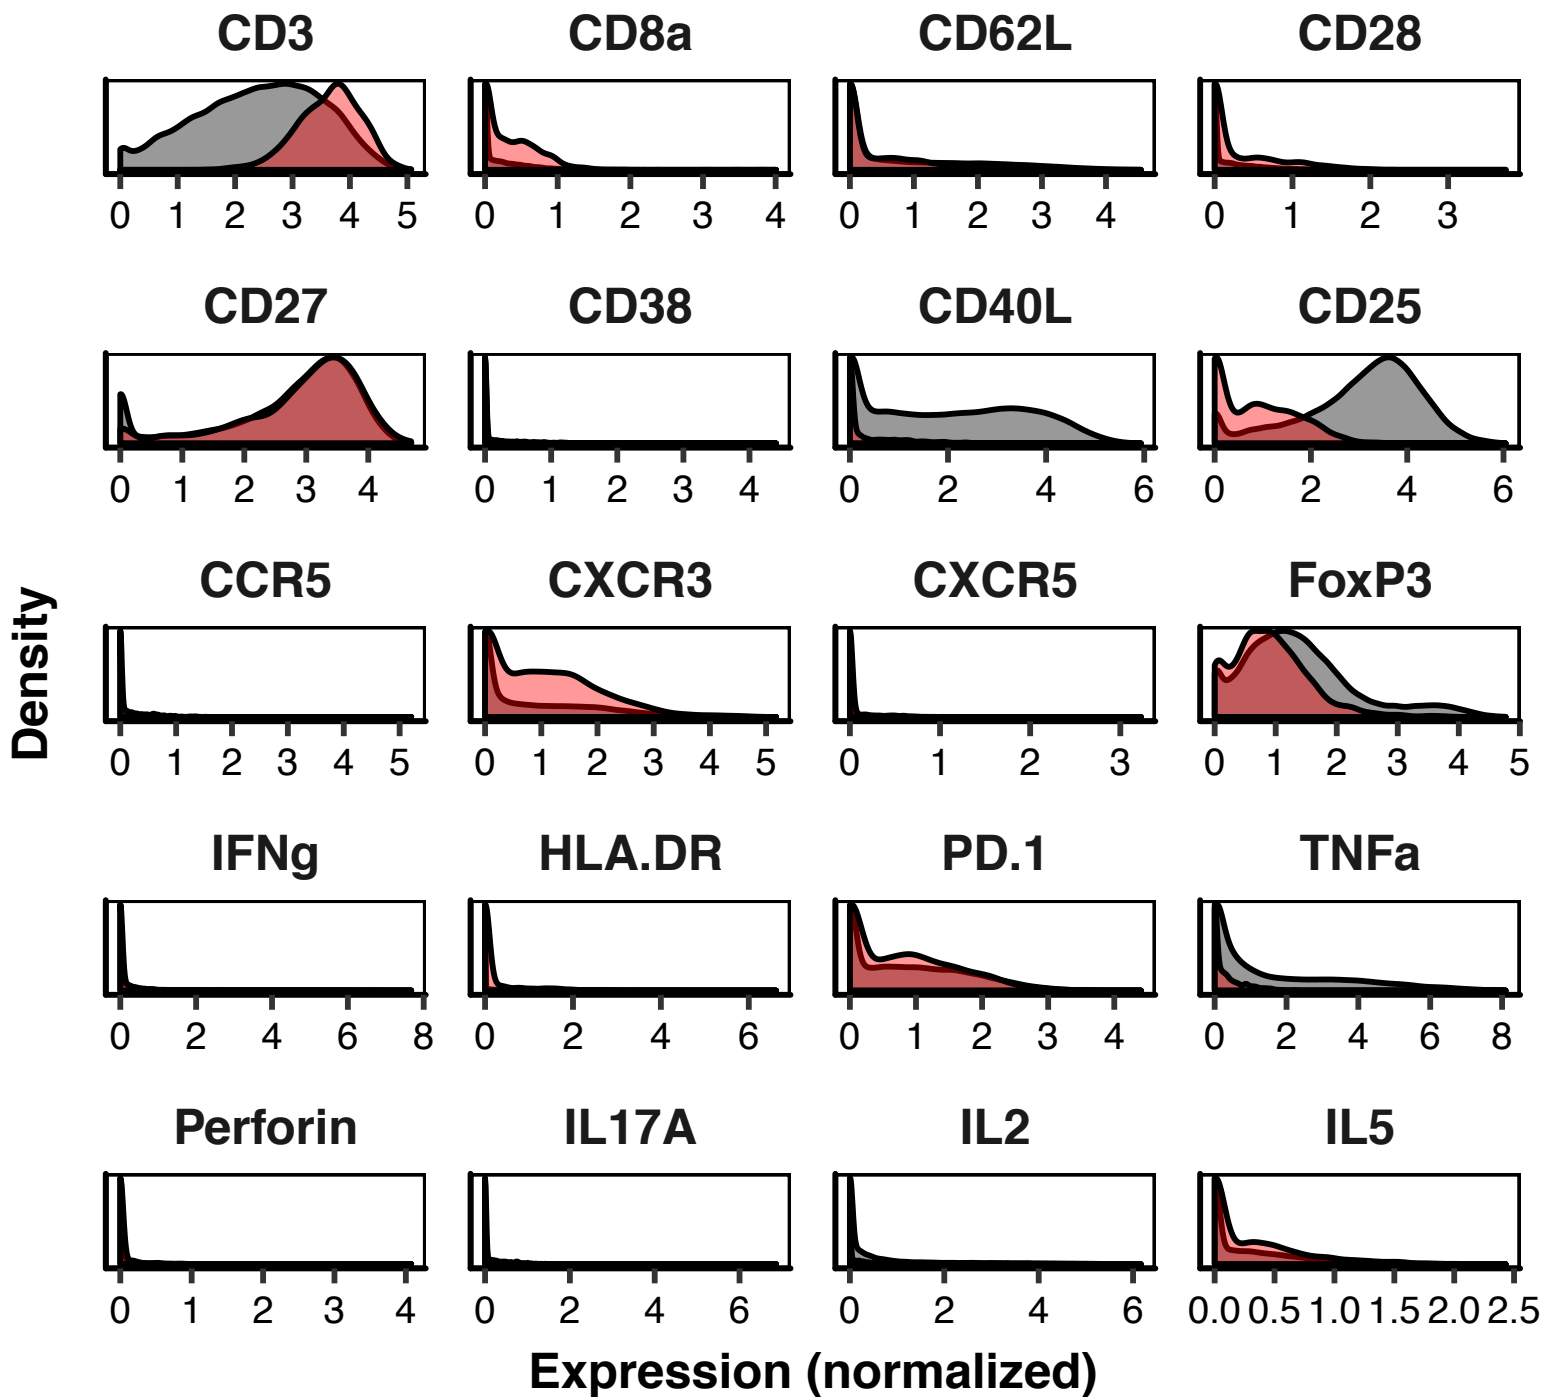

# Cluster 20 – Stimulated

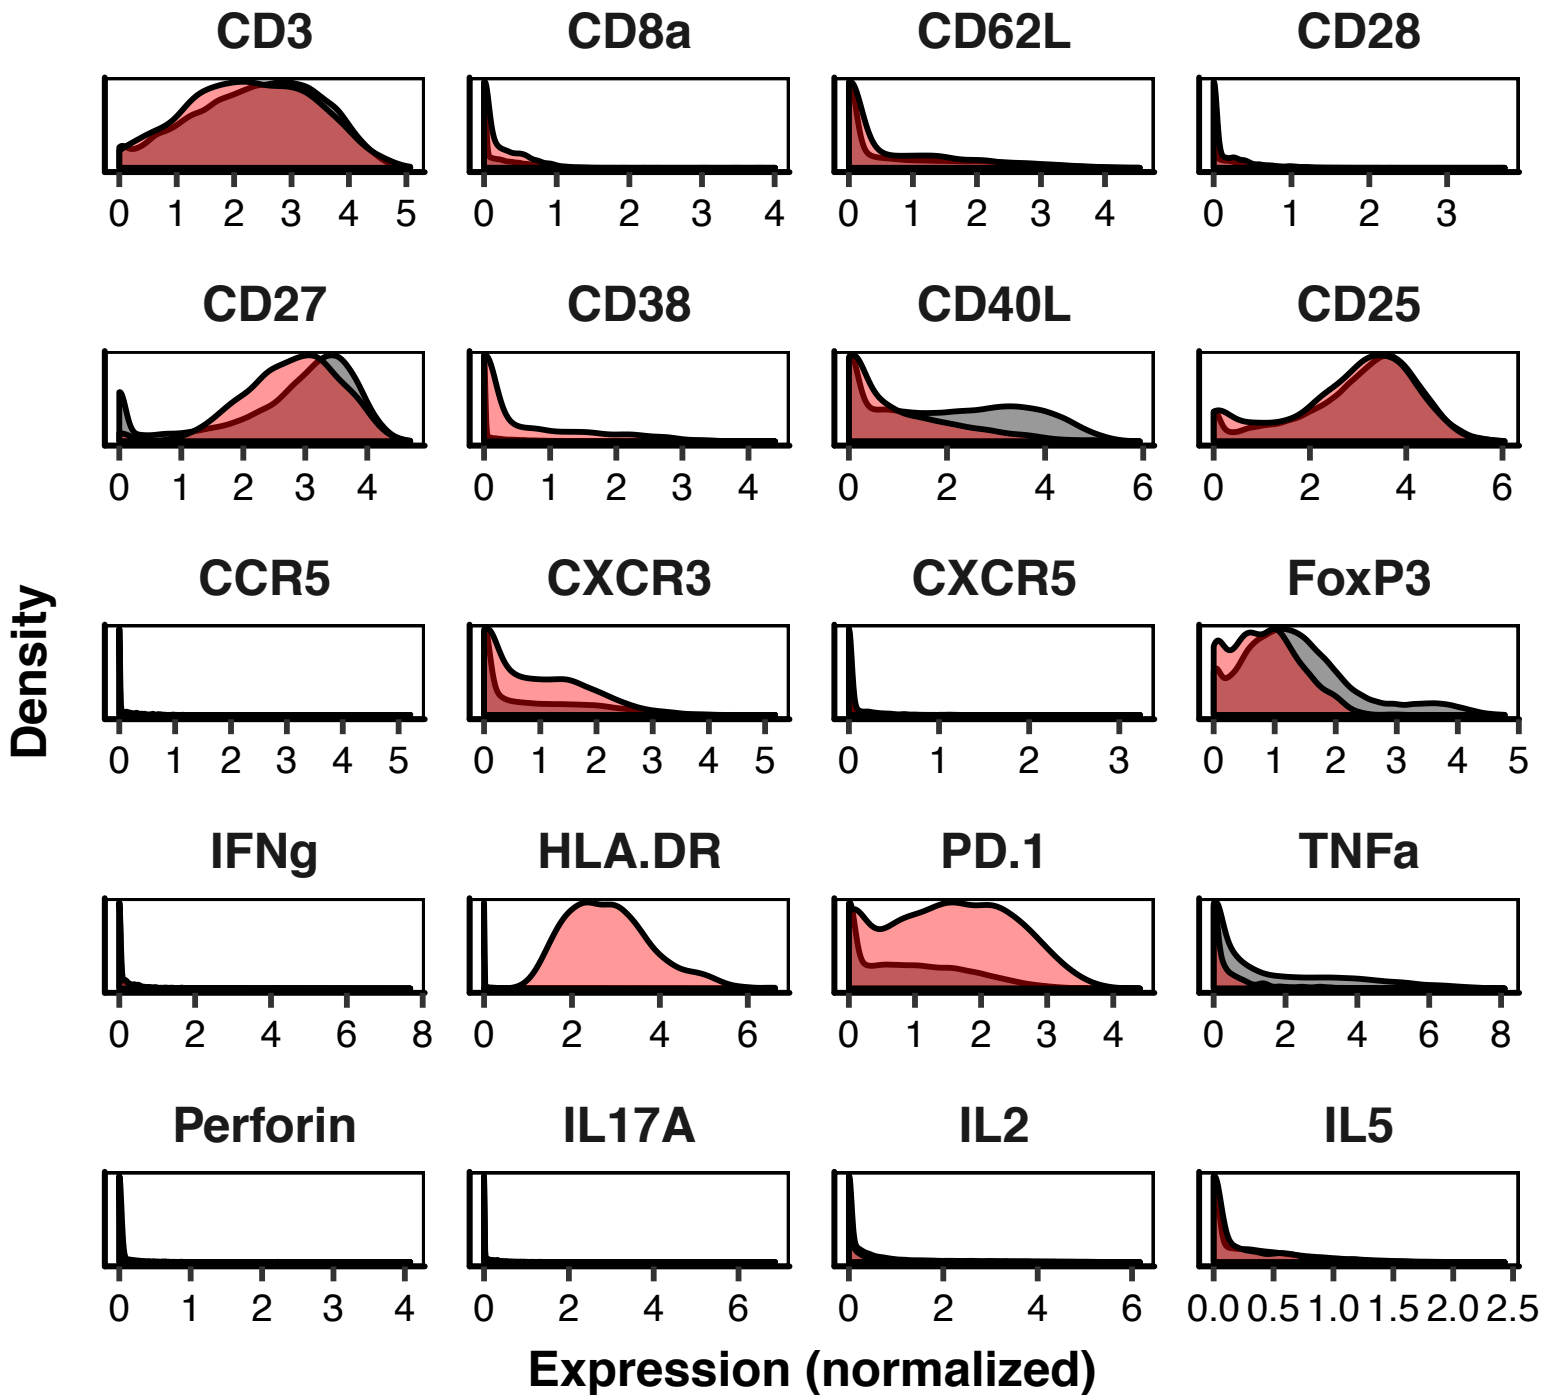

# Cluster 21 – Stimulated

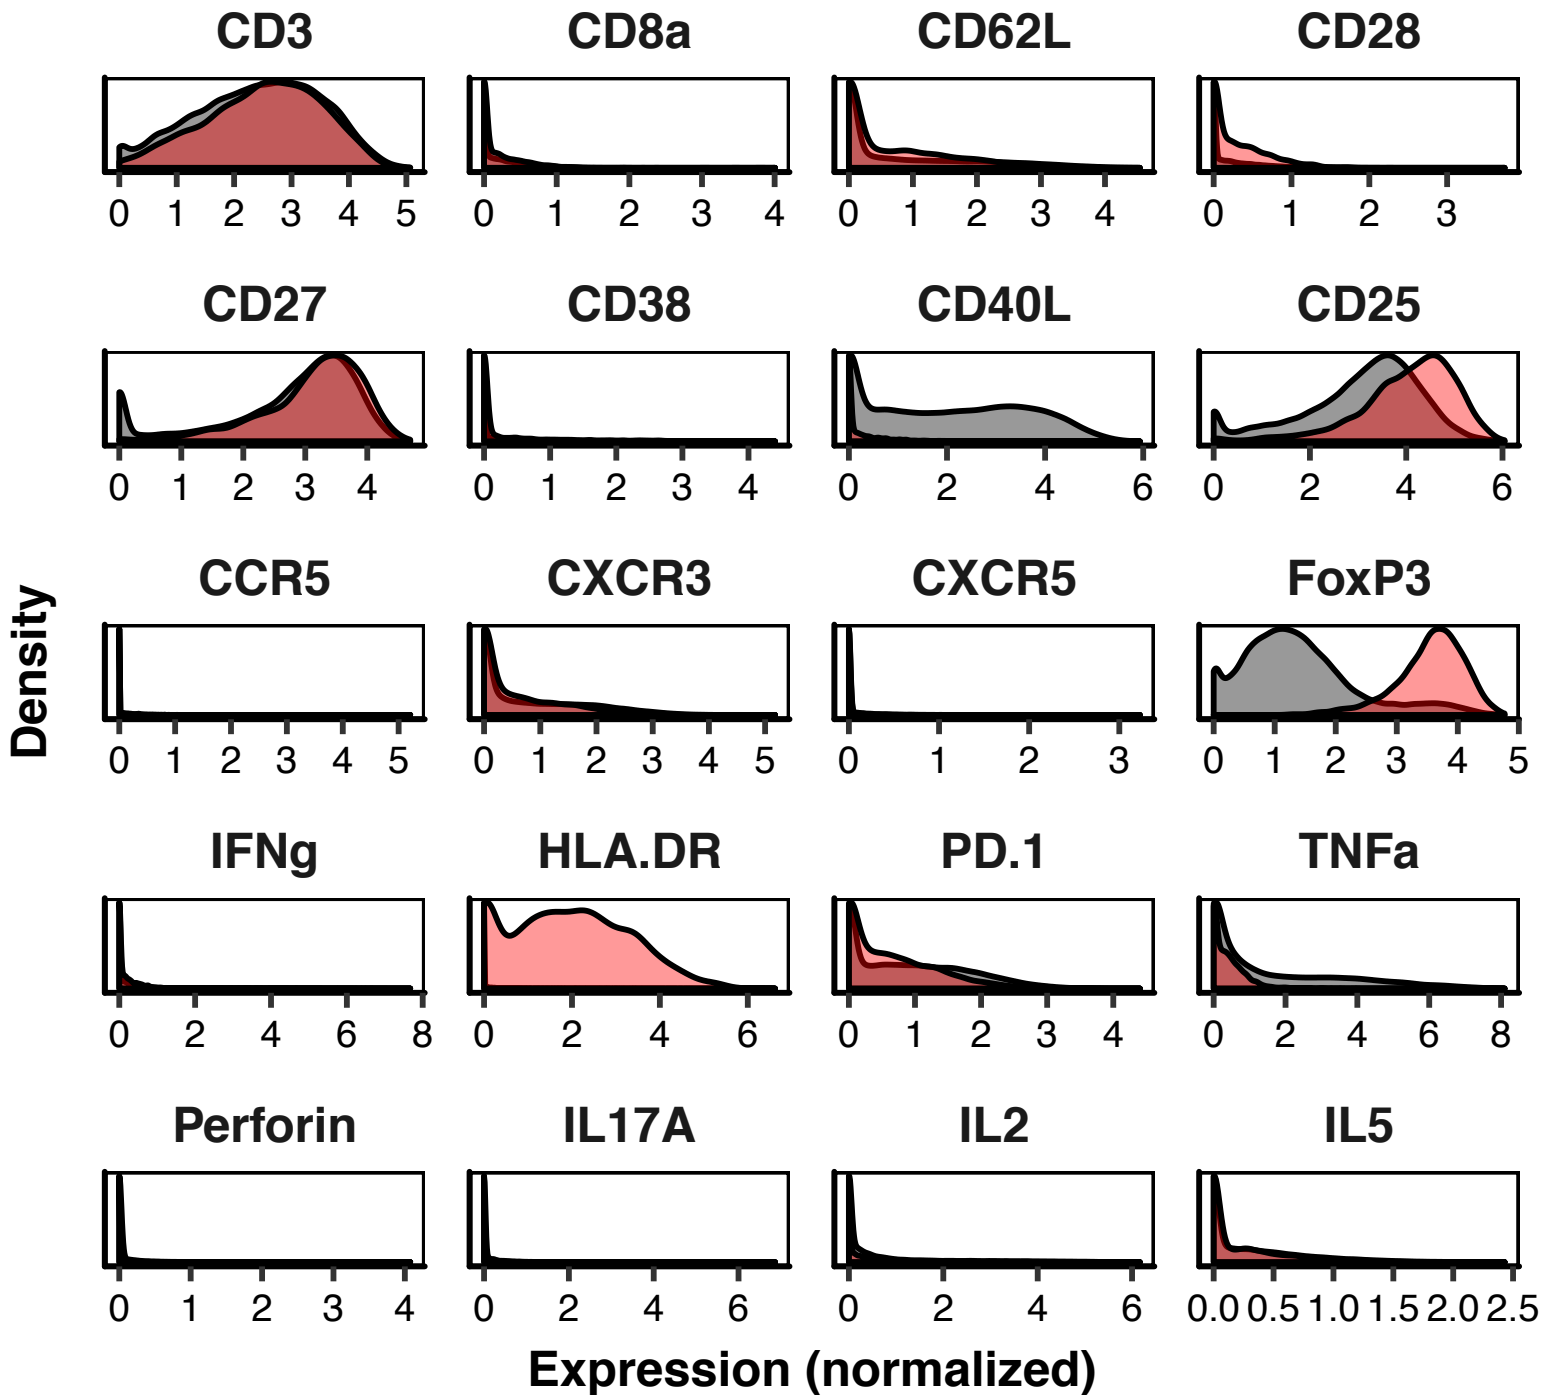

Supplement: NIHMS1009396-supplement-Supplemental_Figure_s15.pdf [file NIHMS1009396-supplement-Supplemental_Figure_s15.pdf]
